# Supplementary material for: Classification of Thyroid Tumors Based on Mass Spectrometry Imaging of Tissue Microarrays; a Single-Pixel Approach
Source: Int J Mol Sci. 2020 Aug 31;21(17):6289. doi: 10.3390/ijms21176289 (PMC7503764; doi:10.3390/ijms21176289)
Supplement: Supplementary file 1 [file ijms-21-06289-s001.xlsx]

## Sheet: Figure S1
Figure S1. Average spectra of each type of ROI

## Sheet: Table S1
Table S1. Included tissue specimens
Tissue Type (ROI)	ROI Abbreviation	Number of Patients	Age of Patients (Median and Range)	Sex of Patients (Female/Male)	pT Tumor Stage (T1a/T1b/T2/T3/T4)	pN Lymph Node Stage (N0/N1a/N1b/Nx)	pM Distant Metastasis Stage (M0/M1)	Specimens (Tissue Cores)	Total Spectra	Spectra/Core (Average)
normal thyroid	NT	31	53 (31-75)	27/4	-	-	-	70	27154	387.914
follicular adenoma of thyroid	FA	21	48 (27-72)	19/2	-	-	-	56	19897	355.304
papillary thyroid carcinoma - classical variant	PTC-CV	23	49 (29-80)	20/3	6/5/7/4/1	9/4/6/4	23/0	58	19412	334.69
papillary thyroid carcinoma - follicular variant	PTC-FV	23	54 (32-75)	19/4	7/5/5/5/1	13/3/4/3	23/0	57	20734	363.754
follicular thyroid carcinoma	FTC	20	64 (37-75)	17/3	0/4/9/6/1	11/0/3/6	19/1	55	18864	342.982
anaplastic thyroid carcinoma	ATC	9	54 (47-78)	7/2	1/1/0/2/5	2/3/3/1	9/0	21	7370	350.952
medullary thyroid carcinoma	MTC	20	52 (37-84)	7/13	1/6/9/3/1	4/2/12/2	20/0	58	20733	357.466

## Sheet: Table S2
Table S2. Intra-ROI similarity of spectral features
	based on all 1536 components					based on 147 most abundant components
ROI	Median	Lower Quartile	Upper Quartile	Mean	Variance	Median	Lower Quartile	Upper Quartile	Mean	Variance
NT	0.932844	0.767142	0.979451	0.844189	0.035211	0.905406	0.69298	0.971782	0.813219	0.0405195
FA	0.83073	0.694575	0.92174	0.79228	0.0251545	0.77639	0.6411	0.886508	0.753048	0.0263453
MTC	0.821294	0.701869	0.901471	0.783395	0.0244089	0.643346	0.566769	0.725511	0.638197	0.0167648
PTC-FV	0.808537	0.61296	0.932642	0.758748	0.0378729	0.636444	0.522594	0.830874	0.66175	0.036603
PTC-CV	0.776592	0.630287	0.878459	0.739908	0.029742	0.63632	0.539343	0.738894	0.632914	0.0226483
FTC	0.775946	0.637751	0.881277	0.748445	0.0257082	0.652875	0.550653	0.758309	0.653144	0.0216298
ATC	0.774138	0.665862	0.876938	0.763473	0.0190539	0.652844	0.57558	0.736109	0.657687	0.0152649
cancers	0.768964	0.61773	0.879842	0.735083	0.0309735	0.623139	0.528757	0.728594	0.625145	0.0234325
WDTC	0.766443	0.607632	0.884943	0.733337	0.0325488	0.625768	0.523478	0.750256	0.633992	0.0273204

## Sheet: Table S3
Table S3. Inter-ROI similarity of spectral features
	based on all 1536 components					based on 147 most abundant components
ROI1 vs ROI2	Median	Lower Quartile	Upper Quartile	Mean	Variance	Median	Lower Quartile	Upper Quartile	Mean	Variance
NT vs FA	0.845603	0.677627	0.946199	0.793563	0.0319279	0.79752	0.618846	0.928053	0.759107	0.0351444
NT vs PTC-FV	0.814401	0.562364	0.942484	0.743964	0.0488167	0.705437	0.49814	0.910711	0.689263	0.0512701
FA vs PTC-FV	0.794343	0.623661	0.91322	0.753845	0.0340025	0.698968	0.544178	0.863026	0.6927	0.0364332
MTC vs PTC-CV	0.788111	0.652316	0.880471	0.750521	0.0272443	0.631446	0.546189	0.722049	0.626136	0.0189972
ATC vs MTC	0.786926	0.672515	0.877803	0.761215	0.0219663	0.640011	0.56354	0.72161	0.637834	0.0161793
FTC vs MTC	0.776033	0.638772	0.876848	0.743553	0.0272292	0.630292	0.541118	0.722533	0.626138	0.0189138
FTC vs PTC-CV	0.770468	0.6265	0.874477	0.737309	0.0283279	0.639813	0.539206	0.743057	0.636526	0.0224685
MTC vs WDTC	0.768605	0.616446	0.87655	0.732398	0.0311968	0.615473	0.525804	0.711027	0.612383	0.0206405
ATC vs PTC-CV	0.767631	0.640419	0.867861	0.741624	0.0246583	0.638775	0.551014	0.728029	0.635464	0.0181338
FTC vs PTC-FV	0.759081	0.604075	0.886018	0.733063	0.0315541	0.619788	0.521623	0.754981	0.63752	0.0276108
ATC vs FTC	0.755764	0.624409	0.859347	0.729695	0.0259528	0.634687	0.54021	0.727379	0.629618	0.0194757
FA vs WDTC	0.754712	0.583209	0.882563	0.720275	0.0364785	0.66024	0.519814	0.810285	0.658068	0.0350866
FA vs FTC	0.753529	0.589477	0.876413	0.722335	0.0329879	0.664846	0.531143	0.801071	0.661319	0.0307507
ATC vs WDTC	0.740907	0.597486	0.854388	0.714796	0.0293041	0.615465	0.518453	0.712518	0.612691	0.0209421
PTC-CV vs PTC-FV	0.739736	0.564507	0.87195	0.706664	0.0376584	0.596312	0.490271	0.723129	0.605473	0.0297925
MTC vs PTC-FV	0.734613	0.562824	0.871106	0.705283	0.0373511	0.58816	0.490669	0.683276	0.586992	0.0227561
FA vs cancers	0.727557	0.555597	0.863218	0.698816	0.0374951	0.631676	0.49749	0.77641	0.633399	0.0340495
FA vs PTC-CV	0.714142	0.536542	0.850224	0.682418	0.0398743	0.623575	0.482772	0.761654	0.61792	0.0349585
NT vs WDTC	0.701328	0.483551	0.889551	0.678026	0.0510591	0.600314	0.441595	0.823385	0.622932	0.0490694
ATC vs PTC-FV	0.692132	0.535917	0.830189	0.676123	0.0343314	0.575968	0.472377	0.671485	0.575971	0.0228109
NT vs FTC	0.678932	0.490575	0.865598	0.67079	0.0445343	0.590749	0.453847	0.791308	0.617074	0.0417926
FA vs MTC	0.675536	0.510625	0.819081	0.657475	0.0366328	0.583822	0.460723	0.703206	0.582412	0.0274865
FA vs ATC	0.660857	0.494626	0.802122	0.643296	0.0364826	0.582419	0.451817	0.705011	0.579306	0.029096
NT vs cancers	0.643902	0.450332	0.85087	0.643691	0.050401	0.560719	0.414228	0.751319	0.585793	0.0455143
NT vs PTC-CV	0.614252	0.424252	0.814487	0.614629	0.0510808	0.540387	0.391133	0.713539	0.557778	0.0448125
NT vs MTC	0.554842	0.408646	0.747946	0.57867	0.0420479	0.499014	0.379626	0.615889	0.51218	0.0291274
NT vs ATC	0.529657	0.391423	0.706479	0.551694	0.0388354	0.47933	0.363351	0.603669	0.495514	0.0287093

## Sheet: Table S4
Table S4. Indices of multicomponet classifiers
Indices of binary classifiers
Accuracy								Sensitivity								Specificity
1536 components; a single spectrum-based
	FA	MTC	ATC	PTC-FV	PTC-CV	FTC			FA	MTC	ATC	PTC-FV	PTC-CV	FTC			FA	MTC	ATC	PTC-FV	PTC-CV	FTC
NT	0.9019	0.9218	0.9356	0.8277	0.9244	0.8839		NT	0.9242	0.9183	0.8866	0.7985	0.9075	0.8757		NT	0.9018	0.9285	0.9489	0.8485	0.9292	0.8881
FA		0.9212	0.9037	0.8363	0.8803	0.633		FA		0.9352	0.9129	0.8359	0.8874	0.6466		FA		0.9089	0.9089	0.858	0.8761	0.6517
MTC			0.8349	0.8215	0.8424	0.8394		MTC			0.7618	0.7977	0.8021	0.8331		MTC			0.8705	0.846	0.883	0.855
ATC				0.8825	0.8729	0.8139		ATC				0.8864	0.8812	0.847		ATC				0.8483	0.8321	0.7475
PTC-FV					0.7343	0.7342		PTC-FV					0.7405	0.793		PTC-FV					0.7078	0.7283
PTC-CV						0.7849		PTC-CV						0.7734		PTC-CV						0.7731
147 components; a sinle spectrum-based
	FA	MTC	ATC	PTC-FV	PTC-CV	FTC			FA	MTC	ATC	PTC-FV	PTC-CV	FTC			FA	MTC	ATC	PTC-FV	PTC-CV	FTC
NT	0.8831	0.903	0.9561	0.8023	0.9172	0.8525		NT	0.8935	0.9018	0.9015	0.7573	0.919	0.851		NT	0.8879	0.9121	0.972	0.8364	0.9119	0.8536
FA		0.9011	0.8615	0.8012	0.8345	0.565		FA		0.9069	0.7914	0.7923	0.8409	0.5796		FA		0.8975	0.8806	0.8247	0.8311	0.5766
MTC			0.8016	0.7848	0.8003	0.82		MTC			0.6918	0.7572	0.7785	0.8161		MTC			0.8475	0.8112	0.8212	0.8308
ATC				0.8644	0.7928	0.8046		ATC				0.8659	0.8159	0.8496		ATC				0.8524	0.6906	0.722
PTC-FV					0.673	0.7124		PTC-FV					0.6874	0.7664		PTC-FV					0.6462	0.7147
PTC-CV						0.7435		PTC-CV						0.7345		PTC-CV						0.7335
1536 components; a mean spectrum-based
	FA	MTC	ATC	PTC-FV	PTC-CV	FTC			FA	MTC	ATC	PTC-FV	PTC-CV	FTC			FA	MTC	ATC	PTC-FV	PTC-CV	FTC
NT	0.9034	0.9198	0.9307	0.8321	0.9194	0.9119		NT	0.9263	0.9062	0.9048	0.8111	0.9381	0.9413		NT	0.9015	0.9449	0.9405	0.8739	0.9062	0.8921
FA		0.873	0.8314	0.7638	0.8613	0.5368		FA		0.8467	0.75	0.7282	0.8818	0.553		FA		0.9116	0.82	0.8386	0.8543	0.6217
MTC			0.8213	0.7853	0.8446	0.8875		MTC			0.7	0.7615	0.8929	0.915		MTC			0.8256	0.8207	0.8038	0.8744
ATC				0.8572	0.827	0.7794		ATC				0.8479	0.8323	0.785		ATC				0.8667	0.65	0.45
PTC-FV					0.7216	0.7795		PTC-FV					0.7854	0.8885		PTC-FV					0.6455	0.7457
PTC-CV						0.6782		PTC-CV						0.6253		PTC-CV						0.744
Contribution of "not classified" spectra
Actual ROI	Minimum	Average	Maximum
1536 components; a single-pixel approach
NT	0	0.0323819	0.475758
MTC	0	0.0603226	0.932292
FA	0	0.0608516	0.480892
PTC-FV	0	0.0659431	0.28254
FTC	0	0.083076	0.397015
PTC-CV	0	0.0899521	0.91092
ATC	0.00510204	0.0976899	0.378223
147 components; a single-pixel approach
NT	0	0.035478	0.269697
MTC	0	0.0635309	0.434896
FA	0	0.0920872	0.372159
PTC-FV	0	0.103878	0.554054
PTC-CV	0	0.112049	0.570093
FTC	0	0.134151	0.665672
ATC	0	0.168349	0.644578
Core's classification indices
Actual ROI	TP	TN	FP	FN	accuracy	sensitivity	specificity	PPV	NPV	ClassificationRate
1536 components; a single-pixel approach
ATC	13	349	5	8	0.965333	0.619048	0.985876	0.722222	0.977591	0.952381
FA	36	296	23	20	0.885333	0.642857	0.9279	0.610169	0.936709	0.964286
FTC	21	298	22	34	0.850667	0.381818	0.93125	0.488372	0.89759	0.963636
MTC	45	311	6	13	0.949333	0.775862	0.981073	0.882353	0.959877	0.965517
NT	61	290	15	9	0.936	0.871429	0.95082	0.802632	0.9699	0.985714
PTC-CV	38	305	12	20	0.914667	0.655172	0.962145	0.76	0.938462	0.965517
PTC-FV	36	287	31	21	0.861333	0.631579	0.902516	0.537313	0.931818	0.982456
147 components; a single-pixel approach
ATC	7	348	6	14	0.946667	0.333333	0.983051	0.538462	0.961326	0.904762
FA	29	294	25	27	0.861333	0.517857	0.92163	0.537037	0.915888	0.982143
FTC	14	294	26	41	0.821333	0.254545	0.91875	0.35	0.877612	0.927273
MTC	43	301	16	15	0.917333	0.741379	0.949527	0.728814	0.952532	0.982759
NT	60	284	21	10	0.917333	0.857143	0.931148	0.740741	0.965986	1
PTC-CV	31	298	19	27	0.877333	0.534483	0.940063	0.62	0.916923	0.913793
PTC-FV	23	279	39	34	0.805333	0.403509	0.877358	0.370968	0.891374	0.947368
1536 components; a mean spectrum approach
ATC	5	352	2	16	0.952	0.238095	0.99435	0.714286	0.956522	0.904762
FA	20	298	21	36	0.848	0.357143	0.934169	0.487805	0.892216	0.946429
FTC	18	289	31	37	0.818667	0.327273	0.903125	0.367347	0.886503	0.981818
MTC	40	299	18	18	0.904	0.689655	0.943218	0.689655	0.943218	0.948276
NT	58	288	17	12	0.922667	0.828571	0.944262	0.773333	0.96	0.985714
PTC-CV	29	297	20	29	0.869333	0.5	0.936909	0.591837	0.911043	0.913793
PTC-FV	24	268	50	33	0.778667	0.421053	0.842767	0.324324	0.890365	0.877193
1536 components; a hybrid approach
ATC	13	350	4	8	0.968	0.619048	0.988701	0.764706	0.977654	1
FA	35	298	21	21	0.888	0.625	0.934169	0.625	0.934169	0.964286
FTC	22	296	24	33	0.848	0.4	0.925	0.478261	0.899696	0.963636
MTC	44	313	4	14	0.952	0.758621	0.987382	0.916667	0.957187	0.931034
NT	63	291	14	7	0.944	0.9	0.954098	0.818182	0.97651	1
PTC-CV	36	304	13	22	0.906667	0.62069	0.958991	0.734694	0.932515	0.931034
PTC-FV	36	286	32	21	0.858667	0.631579	0.899371	0.529412	0.931596	0.964912

## Sheet: Table S5
Table S5. Significance of differences in abundance of molecular components detected by MSI between tissue types shown as the Cohen's d effect size
Spectral component				NT vs FA		NT vs cancers		NT vs WDTC		NT vs ATC		NT vs MTC		NT vs FTC		NT vs PTC-CV		NT vs PTC-FV		FA vs cancers		FA vs WDTC		FA vs ATC		FA vs MTC		FA vs FTC		FA vs PTC-CV		FA vs PTC-FV		ATC vs WDTC		ATC vs MTC		ATC vs FTC		ATC vs PTC-CV		ATC vs PTC-FV		MTC vs WDTC		FTC vs MTC		MTC vs PTC-CV
Peak vs No	m/z	intensity class	average intensity	effect size	description	effect size	description	effect size	description	effect size	description	effect size	description	effect size	description	effect size	description	effect size	description	effect size	description	effect size	description	effect size	description	effect size	description	effect size	description	effect size	description	effect size	description	effect size	description	effect size	description	effect size	description	effect size	description	effect size	description	effect size	description	effect size	description	effect size	description
1	699.939	5	117.095	-0.296175	small	-0.163443	small	-0.153241	small	-0.291454	small	-0.140487	small	-0.240774	small	-0.254896	small	0.0256805	small	0.138425	small	0.147341	small	0.000795723	small	0.162667	small	0.0539979	small	0.0442777	small	0.332749	small	0.146098	small	0.161725	small	0.0526716	small	0.0434086	small	0.331157	small	-0.0130139	small	0.106402	small	-0.11923	small
2	700.063	4	976.813	-0.381175	small	-0.205072	small	-0.19646	small	-0.369004	small	-0.167924	small	-0.313886	small	-0.317778	small	0.0306639	small	0.184119	small	0.192173	small	0.0104436	small	0.222734	small	0.0646098	small	0.0727744	small	0.428127	small	0.181621	small	0.213052	small	0.0535453	small	0.062271	small	0.422901	small	-0.0298529	small	0.154691	small	-0.154519	small
3	700.843	3	3520.95	-0.440779	small	-0.260707	small	-0.248855	small	-0.457645	small	-0.217428	small	-0.397476	small	-0.362724	small	0.00597729	small	0.200633	small	0.211292	small	-0.0108642	small	0.240367	small	0.0474576	small	0.09788	small	0.472333	small	0.226103	small	0.259581	small	0.0590193	small	0.112842	small	0.506859	medium	-0.0321452	small	0.193911	small	-0.151314	small
4	705.12	2	7847.54	-0.621169	medium	-0.3599	small	-0.346754	small	-0.670034	medium	-0.315709	small	-0.55547	medium	-0.532168	medium	0.00742098	small	0.267187	small	0.283265	small	-0.0198081	small	0.317411	small	0.0685429	small	0.12813	small	0.640378	medium	0.3102	small	0.350379	small	0.089157	small	0.155736	small	0.706044	medium	-0.0404308	small	0.249118	small	-0.208238	small
5	715.029	2	6355.89	-0.436323	small	-0.156893	small	-0.146435	small	-0.388562	small	-0.107687	small	-0.314342	small	-0.262854	small	0.124302	small	0.290293	small	0.299474	small	0.0540635	small	0.337361	small	0.115897	small	0.197287	small	0.562312	medium	0.244292	small	0.288861	small	0.0612619	small	0.144042	small	0.527547	medium	-0.0420253	small	0.214632	small	-0.156927	small
6	719.414	2	7149.6	-0.542034	medium	-0.269277	small	-0.261959	small	-0.54566	medium	-0.207391	small	-0.450724	small	-0.437991	small	0.0707013	small	0.279181	small	0.287952	small	0.0123819	small	0.342519	small	0.0900667	small	0.139544	small	0.614466	medium	0.278563	small	0.339259	small	0.0775918	small	0.131125	small	0.63003	medium	-0.0603457	small	0.25054	small	-0.225736	small
7	720.373	5	259.289	-0.26009	small	-0.0206648	small	-0.011972	small	-0.134682	small	-0.00359309	small	-0.155892	small	-0.102528	small	0.208061	small	0.246955	small	0.253906	small	0.12214	small	0.261587	small	0.103538	small	0.168179	small	0.465296	small	0.125274	small	0.135525	small	-0.0206117	small	0.0386156	small	0.345064	small	-0.00854701	small	0.155898	small	-0.102229	small
8	721.772	3	3287.36	-0.564799	medium	-0.321164	small	-0.310516	small	-0.60121	medium	-0.283135	small	-0.505346	medium	-0.537173	medium	0.0615642	small	0.242463	small	0.257263	small	-0.0108673	small	0.285842	small	0.0611329	small	0.0733234	small	0.620696	medium	0.273176	small	0.305388	small	0.0723496	small	0.0888642	small	0.66653	medium	-0.0351933	small	0.225001	small	-0.236266	small
9	722.375	5	182.791	-0.219046	small	-0.0433493	small	-0.0482779	small	-0.047068	small	-0.0259525	small	-0.149298	small	-0.172739	small	0.162618	small	0.188839	small	0.181356	small	0.169753	small	0.203986	small	0.0716281	small	0.0610656	small	0.386283	small	0.00063369	small	0.0240638	small	-0.101565	small	-0.127552	small	0.215635	small	-0.0232583	small	0.131262	small	-0.156971	small
10	722.945	2	4860.83	-0.544685	medium	-0.279465	small	-0.267901	small	-0.58617	medium	-0.230005	small	-0.397025	small	-0.520457	medium	0.0710735	small	0.261688	small	0.27555	small	-0.0181796	small	0.31821	small	0.135351	small	0.0655846	small	0.608667	medium	0.298882	small	0.346519	small	0.152813	small	0.0883952	small	0.658415	medium	-0.0466254	small	0.174607	small	-0.278166	small
11	725.172	3	3511.3	-0.585964	medium	-0.280744	small	-0.279816	small	-0.608988	medium	-0.194891	small	-0.472506	small	-0.500705	medium	0.0889076	small	0.29801	small	0.301807	small	0.000527162	small	0.388836	small	0.104039	small	0.123747	small	0.665285	medium	0.304915	small	0.398855	small	0.102919	small	0.127542	small	0.698079	medium	-0.0922372	small	0.278729	small	-0.292778	small
12	727.083	2	4802	-0.607848	medium	-0.319627	small	-0.306287	small	-0.661365	medium	-0.27919	small	-0.502593	medium	-0.543132	medium	0.0718228	small	0.275593	small	0.294312	small	-0.0229665	small	0.326856	small	0.0939198	small	0.111829	small	0.665556	medium	0.322946	small	0.358633	small	0.115865	small	0.142056	small	0.724831	medium	-0.0383134	small	0.226801	small	-0.240989	small
13	730.374	2	4496.52	-0.58887	medium	-0.648559	medium	-0.579977	medium	-0.715785	medium	-0.630536	medium	-0.658366	medium	-0.698814	medium	-0.271198	small	0.0479214	small	0.0909761	small	-0.172702	small	0.0014848	small	-0.0758409	small	-0.0853486	small	0.408448	small	0.280821	small	0.208009	small	0.0982597	small	0.111723	small	0.632393	medium	0.0952142	small	0.0867272	small	-0.0997007	small
14	731.4	2	4366.06	-0.574196	medium	-0.784482	medium	-0.703139	medium	-0.758469	medium	-0.688361	medium	-0.762406	medium	-0.757112	medium	-0.362064	small	-0.0624026	small	-0.0209759	small	-0.276688	small	-0.0867796	small	-0.214602	small	-0.19151	small	0.317568	small	0.297217	small	0.25811	small	0.0779936	small	0.123886	small	0.684785	medium	0.0707462	small	0.16089	small	-0.130709	small
15	732.401	4	1158.05	-0.50849	medium	-0.472159	small	-0.445557	small	-0.639157	medium	-0.417208	small	-0.614939	medium	-0.6012	medium	-0.103278	small	0.0917688	small	0.104152	small	-0.138538	small	0.135616	small	-0.105386	small	-0.0641164	small	0.461199	small	0.254141	small	0.30524	small	0.0334037	small	0.0891619	small	0.646623	medium	-0.0292465	small	0.254328	small	-0.220885	small
16	733.045	3	1769.39	-0.471216	small	-0.193543	small	-0.214687	small	-0.49128	small	-0.0397541	small	-0.306555	small	-0.46884	small	0.0983252	small	0.272626	small	0.254811	small	-0.00735963	small	0.423817	small	0.147366	small	0.0378399	small	0.564004	medium	0.264649	small	0.439563	small	0.152034	small	0.0469481	small	0.592069	medium	-0.174772	small	0.262954	small	-0.422224	small
17	734.279	2	5365.14	-0.528233	medium	-0.214636	small	-0.209438	small	-0.544327	medium	-0.131905	small	-0.375505	small	-0.440239	small	0.152311	small	0.309586	small	0.316649	small	0.00523539	small	0.391787	small	0.137985	small	0.128685	small	0.664925	medium	0.31552	small	0.398174	small	0.132022	small	0.128453	small	0.694328	medium	-0.0818498	small	0.243877	small	-0.296768	small
18	736.401	5	194.163	-0.163646	small	0.077172	small	0.0742368	small	-0.0336027	small	0.12671	small	-0.0486953	small	-0.0202468	small	0.284404	small	0.238901	small	0.23341	small	0.126675	small	0.281862	small	0.107649	small	0.143896	small	0.431978	small	0.105728	small	0.159206	small	-0.0159759	small	0.0136424	small	0.317057	small	-0.0486165	small	0.167536	small	-0.147562	small
19	738.329	2	5381.12	-0.514839	medium	-0.212677	small	-0.201706	small	-0.476026	small	-0.167574	small	-0.375904	small	-0.422956	small	0.163493	small	0.303491	small	0.316141	small	0.0527917	small	0.346545	small	0.130827	small	0.130193	small	0.66706	medium	0.263031	small	0.299553	small	0.0776734	small	0.0757305	small	0.645068	medium	-0.0385539	small	0.21041	small	-0.244205	small
20	738.39	5	231.865	0.227933	small	0.399537	small	0.376976	small	0.516559	medium	0.455244	small	0.443095	small	0.352028	small	0.367782	small	0.178098	small	0.154031	small	0.271383	small	0.217588	small	0.216267	small	0.1176	small	0.131205	small	-0.115464	small	-0.0585048	small	-0.0424231	small	-0.157816	small	-0.147864	small	-0.0587164	small	-0.0117249	small	-0.100936	small
21	739.459	3	2252.58	-0.538672	medium	-0.227064	small	-0.222499	small	-0.515786	medium	-0.155383	small	-0.392792	small	-0.435127	small	0.127962	small	0.309749	small	0.315959	small	0.0383596	small	0.380861	small	0.133914	small	0.138477	small	0.65906	medium	0.278481	small	0.350031	small	0.0952102	small	0.100736	small	0.649876	medium	-0.07151	small	0.2389	small	-0.269731	small
22	740.401	4	1436.61	-0.577774	medium	-0.2679	small	-0.272124	small	-0.571895	medium	-0.16838	small	-0.451543	small	-0.475005	small	0.0705591	small	0.307431	small	0.305643	small	0.0223973	small	0.408989	small	0.117698	small	0.138555	small	0.644002	medium	0.284784	small	0.395179	small	0.094637	small	0.118134	small	0.64686	medium	-0.109079	small	0.285223	small	-0.298256	small
23	741.345	3	2386.95	-0.560284	medium	-0.268353	small	-0.263294	small	-0.566054	medium	-0.200084	small	-0.433097	small	-0.478266	small	0.0821869	small	0.288753	small	0.295457	small	0.0134966	small	0.361885	small	0.115706	small	0.119592	small	0.63622	medium	0.284448	small	0.357315	small	0.101583	small	0.108822	small	0.651936	medium	-0.0706995	small	0.238195	small	-0.268151	small
24	743.398	2	6222.22	-0.552161	medium	-0.233734	small	-0.230608	small	-0.484367	small	-0.168234	small	-0.398596	small	-0.431842	small	0.10521	small	0.321179	small	0.322869	small	0.0784518	small	0.390115	small	0.140915	small	0.157596	small	0.650197	medium	0.2415	small	0.317009	small	0.0621104	small	0.0749887	small	0.593574	medium	-0.0698927	small	0.238639	small	-0.260068	small
25	745.617	2	5475.42	-0.506754	medium	-0.207801	small	-0.191156	small	-0.439311	small	-0.181398	small	-0.369521	small	-0.356928	small	0.128781	small	0.307907	small	0.319688	small	0.0780347	small	0.340284	small	0.126211	small	0.18169	small	0.631632	medium	0.239909	small	0.268472	small	0.0486856	small	0.101952	small	0.578615	medium	-0.0186263	small	0.202888	small	-0.177331	small
26	748.466	2	9019.35	-0.563862	medium	-0.284436	small	-0.260618	small	-0.55357	medium	-0.275241	small	-0.427986	small	-0.466165	small	0.0753747	small	0.281883	small	0.303302	small	0.0262391	small	0.303718	small	0.12476	small	0.132246	small	0.637144	medium	0.278693	small	0.285006	small	0.0982361	small	0.107902	small	0.636933	medium	0.00186131	small	0.169395	small	-0.188441	small
27	752.389	2	4172.08	-0.667772	medium	-0.415031	small	-0.394126	small	-0.750697	medium	-0.404946	small	-0.589426	medium	-0.641703	medium	-0.0228338	small	0.238337	small	0.261417	small	-0.0485142	small	0.273237	small	0.0664645	small	0.0711345	small	0.640299	medium	0.315537	small	0.332299	small	0.113702	small	0.127374	small	0.723841	medium	-0.0108356	small	0.200511	small	-0.220127	small
28	754.391	3	3616.09	-0.590468	medium	-0.315581	small	-0.29942	small	-0.630567	medium	-0.282302	small	-0.487585	small	-0.533451	medium	0.0709392	small	0.266637	small	0.284128	small	-0.0145336	small	0.313156	small	0.0931016	small	0.09655	small	0.651318	medium	0.302935	small	0.337319	small	0.107082	small	0.116298	small	0.698135	medium	-0.0300544	small	0.213803	small	-0.237964	small
29	757.325	2	5033.18	-0.56466	medium	-0.279886	small	-0.265065	small	-0.587454	medium	-0.244882	small	-0.450441	small	-0.483224	small	0.0939437	small	0.27476	small	0.291718	small	0.000534606	small	0.319992	small	0.0989327	small	0.120421	small	0.645323	medium	0.294402	small	0.327197	small	0.0973714	small	0.124306	small	0.675951	medium	-0.0310053	small	0.212016	small	-0.222446	small
30	758.585	3	1792.51	-0.473188	small	-0.128107	small	-0.125007	small	-0.334047	small	-0.0731657	small	-0.293781	small	-0.287196	small	0.177337	small	0.337407	small	0.337316	small	0.142337	small	0.391105	small	0.160795	small	0.206721	small	0.622893	medium	0.190424	small	0.25107	small	0.0206261	small	0.0564986	small	0.494468	small	-0.0544756	small	0.217665	small	-0.206849	small
31	760.35	3	3961.71	-0.323394	small	-0.0672737	small	-0.0677508	small	-0.24572	small	-0.00232003	small	-0.203707	small	-0.233789	small	0.219085	small	0.262605	small	0.255173	small	0.0886202	small	0.321538	small	0.11063	small	0.109807	small	0.521896	medium	0.1668	small	0.248291	small	0.0249531	small	0.0171134	small	0.468167	small	-0.065822	small	0.202042	small	-0.235681	small
32	761.358	3	3154.05	-0.516302	medium	-0.190707	small	-0.186772	small	-0.481291	small	-0.11387	small	-0.391509	small	-0.379601	small	0.179229	small	0.326926	small	0.330852	small	0.0555139	small	0.396772	small	0.120092	small	0.172606	small	0.675229	medium	0.276894	small	0.354016	small	0.0651883	small	0.119287	small	0.658539	medium	-0.0758586	small	0.274549	small	-0.255757	small
33	763.438	3	2763.26	-0.516908	medium	-0.145068	small	-0.123622	small	-0.482342	small	-0.0999108	small	-0.429212	small	-0.18544	small	0.233975	small	0.372905	small	0.390926	small	0.0623372	small	0.40929	small	0.0844451	small	0.345022	small	0.727447	medium	0.333741	small	0.366318	small	0.0232416	small	0.301593	small	0.726695	medium	-0.0271529	small	0.323596	small	-0.0804623	small
34	766.355	2	6745.5	-0.516426	medium	-0.184633	small	-0.189876	small	-0.449105	small	-0.0919275	small	-0.400417	small	-0.385803	small	0.185988	small	0.331786	small	0.326079	small	0.0880473	small	0.413347	small	0.108863	small	0.170027	small	0.677617	medium	0.2369	small	0.338771	small	0.0215535	small	0.0796223	small	0.632986	medium	-0.0996851	small	0.301091	small	-0.280421	small
35	767.498	3	1525.45	-0.441993	small	-0.105241	small	-0.108004	small	-0.291093	small	-0.0394702	small	-0.291767	small	-0.26808	small	0.217875	small	0.336209	small	0.334757	small	0.151537	small	0.386507	small	0.141363	small	0.197524	small	0.638072	medium	0.174086	small	0.236859	small	-0.0109437	small	0.0347179	small	0.506439	medium	-0.0676223	small	0.242453	small	-0.217958	small
36	769.049	3	3348.81	-0.564447	medium	-0.374814	small	-0.361321	small	-0.657385	medium	-0.362834	small	-0.570071	medium	-0.599667	medium	0.0228842	small	0.181782	small	0.200669	small	-0.0533398	small	0.209615	small	-0.00605268	small	0.0211849	small	0.582168	medium	0.262233	small	0.273244	small	0.0469284	small	0.0833274	small	0.682331	medium	-0.013087	small	0.215245	small	-0.209226	small
37	770.629	2	4229.21	-0.538508	medium	-0.236628	small	-0.229235	small	-0.511859	medium	-0.184295	small	-0.440902	small	-0.419596	small	0.133937	small	0.298139	small	0.30534	small	0.0490369	small	0.35324	small	0.0886569	small	0.159213	small	0.651126	medium	0.257138	small	0.313946	small	0.0398678	small	0.111662	small	0.636908	medium	-0.0531847	small	0.258719	small	-0.221994	small
38	771.44	5	512.337	0.146286	small	0.419855	small	0.398536	small	0.568568	medium	0.44073	small	0.378616	small	0.508099	medium	0.352569	small	0.28997	small	0.271332	small	0.459339	small	0.314411	small	0.251231	small	0.384819	small	0.229026	small	-0.112226	small	-0.104391	small	-0.159273	small	-0.0390112	small	-0.144774	small	-0.0167089	small	0.0550653	small	0.063375	small
39	772.443	2	5042.87	-0.422462	small	-0.0894879	small	-0.0742227	small	-0.320487	small	-0.0566103	small	-0.212599	small	-0.261202	small	0.234623	small	0.337083	small	0.348306	small	0.107902	small	0.362835	small	0.194034	small	0.187237	small	0.626357	medium	0.235025	small	0.259973	small	0.0862647	small	0.0729407	small	0.544734	medium	-0.0201526	small	0.156975	small	-0.201928	small
40	774.615	3	1723.69	-0.589867	medium	-0.344329	small	-0.335278	small	-0.632508	medium	-0.310321	small	-0.531275	medium	-0.543425	medium	0.0133774	small	0.235561	small	0.249839	small	-0.0136254	small	0.280363	small	0.0546172	small	0.0876356	small	0.595893	medium	0.267864	small	0.301309	small	0.0680114	small	0.106016	small	0.641629	medium	-0.0360393	small	0.223452	small	-0.212368	small
41	775.494	2	6222.61	-0.498372	small	-1.41827	very large	-1.16863	large	-1.03861	large	-1.21409	very large	-1.0553	large	-1.08538	large	-0.723723	medium	-0.840713	large	-0.634388	medium	-0.77956	medium	-0.934625	large	-0.708812	medium	-0.747835	medium	-0.242638	small	0.46248	small	0.0132873	small	0.352933	small	0.277213	small	0.792226	medium	0.492813	small	-0.39278	small	0.30604	small
42	776.496	4	887.225	-0.50023	medium	-1.38072	very large	-1.14192	large	-1.0485	large	-1.2514	very large	-1.06203	large	-1.10411	large	-0.708765	medium	-0.807332	large	-0.612249	medium	-0.790988	medium	-0.982829	large	-0.715246	medium	-0.76986	medium	-0.232379	small	0.392698	small	-0.100285	small	0.293856	small	0.180269	small	0.695801	medium	0.477006	small	-0.405806	small	0.278748	small
43	777.078	2	4144.35	-0.756448	medium	-0.641252	medium	-0.604079	medium	-0.946885	large	-0.720558	medium	-0.797052	medium	-0.900159	large	-0.222698	small	0.109575	small	0.153698	small	-0.137	small	0.0747559	small	-0.0370559	small	-0.0647691	small	0.558093	medium	0.304203	small	0.225775	small	0.0995234	small	0.088169	small	0.747363	medium	0.0811063	small	0.113952	small	-0.151531	small
44	780.424	2	5742.15	-0.634596	medium	-0.381454	small	-0.375799	small	-0.713942	medium	-0.320907	small	-0.604235	medium	-0.635823	medium	0.0418592	small	0.246234	small	0.250021	small	-0.0376367	small	0.330713	small	0.0257027	small	0.0538399	small	0.669133	medium	0.294516	small	0.388836	small	0.0630207	small	0.0992109	small	0.758258	medium	-0.0782923	small	0.301615	small	-0.306516	small
45	780.43	5	177.732	-0.14114	small	-0.00798355	small	-0.0291983	small	-0.111014	small	0.0891378	small	-0.14859	small	-0.196538	small	0.22884	small	0.129428	small	0.108402	small	0.0303971	small	0.2262	small	-0.00978609	small	-0.0505538	small	0.362893	small	0.0782803	small	0.195675	small	-0.0391807	small	-0.0835459	small	0.331415	small	-0.115856	small	0.231357	small	-0.284176	small
46	781.418	3	2298.43	-0.259117	small	-0.645803	medium	-0.538283	medium	-0.528755	medium	-0.675002	medium	-0.613062	medium	-0.567862	medium	-0.251722	small	-0.346548	small	-0.257549	small	-0.358077	small	-0.503786	medium	-0.426649	small	-0.367063	small	0.0268463	small	0.160119	small	-0.121559	small	-0.0537218	small	0.0299982	small	0.449516	small	0.271182	small	-0.0550443	small	0.151811	small
47	783.293	2	4262.03	-0.513341	medium	-0.336929	small	-0.31811	small	-0.577944	medium	-0.326302	small	-0.503223	medium	-0.524801	medium	0.0300272	small	0.184634	small	0.202106	small	-0.0389114	small	0.209227	small	0.0130548	small	0.0335867	small	0.544843	medium	0.248028	small	0.26158	small	0.0523302	small	0.0796361	small	0.619715	medium	-0.00678485	small	0.196927	small	-0.194926	small
48	784.732	3	3348.52	-0.547773	medium	-0.20291	small	-0.194934	small	-0.47514	small	-0.144575	small	-0.390426	small	-0.363031	small	0.133518	small	0.342831	small	0.348216	small	0.0876193	small	0.40232	small	0.145038	small	0.215618	small	0.659756	medium	0.259042	small	0.323068	small	0.0580486	small	0.127386	small	0.596971	medium	-0.0567799	small	0.248451	small	-0.211563	small
49	785.423	5	317.993	-0.0811372	small	0.218558	small	0.19469	small	0.259686	small	0.266705	small	0.150202	small	0.228473	small	0.211473	small	0.301394	small	0.27533	small	0.380751	small	0.368527	small	0.240161	small	0.329502	small	0.291934	small	-0.0443826	small	0.0142896	small	-0.101418	small	-0.0288293	small	-0.0164721	small	-0.0568307	small	0.111536	small	-0.040936	small
50	786.436	3	3715.93	-0.523732	medium	-0.171847	small	-0.169153	small	-0.376534	small	-0.118639	small	-0.360308	small	-0.346607	small	0.171066	small	0.352087	small	0.353181	small	0.146662	small	0.404126	small	0.151981	small	0.207578	small	0.675033	medium	0.196373	small	0.254677	small	0.0037867	small	0.0485076	small	0.540149	medium	-0.0554057	small	0.243721	small	-0.222687	small
51	787.452	5	205.473	0.0642658	small	0.333977	small	0.313777	small	0.535666	medium	0.34961	small	0.317555	small	0.303721	small	0.344385	small	0.265371	small	0.24336	small	0.433554	small	0.268184	small	0.239545	small	0.224747	small	0.263886	small	-0.199842	small	-0.18563	small	-0.186759	small	-0.223556	small	-0.18255	small	-0.018667	small	0.0153842	small	-0.0422176	small
52	788.483	2	5632.79	-0.299432	small	0.074017	small	0.104807	small	0.178689	small	-0.0547945	small	-0.0928135	small	0.0822096	small	0.339806	small	0.348119	small	0.367552	small	0.407898	small	0.239977	small	0.182232	small	0.334393	small	0.571915	medium	-0.0527064	small	-0.219826	small	-0.228916	small	-0.0757691	small	0.145816	small	0.149087	small	0.0412257	small	0.126719	small
53	789.477	5	490.372	-0.110362	small	-0.171225	small	-0.121998	small	0.0190225	small	-0.343231	small	-0.154406	small	-0.0913273	small	-0.0970319	small	-0.053301	small	-0.00487346	small	0.157617	small	-0.294875	small	-0.0532828	small	0.0225134	small	0.00937854	small	-0.159499	small	-0.471965	small	-0.221666	small	-0.133311	small	-0.130612	small	0.266813	small	-0.255611	small	0.315511	small
54	790.376	3	3878.65	-0.537275	medium	-0.245869	small	-0.241553	small	-0.46534	small	-0.198486	small	-0.411747	small	-0.443647	small	0.0939733	small	0.296119	small	0.299486	small	0.0858824	small	0.345244	small	0.120326	small	0.133907	small	0.619905	medium	0.210152	small	0.264503	small	0.0339599	small	0.0422675	small	0.559103	medium	-0.0512539	small	0.220324	small	-0.237849	small
55	792.079	3	3757.05	-0.527531	medium	-0.203097	small	-0.201117	small	-0.459751	small	-0.130908	small	-0.380175	small	-0.398263	small	0.144376	small	0.326736	small	0.328916	small	0.0788073	small	0.395728	small	0.139339	small	0.163786	small	0.660589	medium	0.247591	small	0.322922	small	0.0600771	small	0.081494	small	0.606403	medium	-0.0741279	small	0.250728	small	-0.260639	small
56	795.432	2	5596.58	-0.342005	small	0.0419244	small	0.0266263	small	0.0757183	small	0.0779831	small	0.0879373	small	-0.197947	small	0.174153	small	0.379147	small	0.351891	small	0.395798	small	0.41516	small	0.374658	small	0.160668	small	0.500999	medium	-0.0423064	small	0.0017592	small	0.0207984	small	-0.279963	small	0.100027	small	-0.0446978	small	-0.0208501	small	-0.281663	small
57	795.472	5	529.181	0.219729	small	0.375912	small	0.334046	small	0.770713	medium	0.364192	small	0.572511	medium	0.284344	small	0.15545	small	0.173899	small	0.136461	small	0.606229	medium	0.154974	small	0.394862	small	0.072397	small	-0.0705637	small	-0.391603	small	-0.450165	small	-0.0946825	small	-0.519308	medium	-0.682947	medium	0.000995556	small	-0.26952	small	-0.0800306	small
58	796.441	2	5006.06	-0.365241	small	-0.0922268	small	-0.134095	small	-0.159575	small	0.0543756	small	-0.178626	small	-0.39118	small	0.137145	small	0.27922	small	0.231287	small	0.20696	small	0.399163	small	0.161911	small	0.025937	small	0.476307	small	0.0120584	small	0.208299	small	-0.035738	small	-0.228401	small	0.298168	small	-0.181741	small	0.218983	small	-0.437347	small
59	799.363	3	3994.96	-0.515235	medium	-0.217519	small	-0.214711	small	-0.486459	small	-0.149653	small	-0.388687	small	-0.425991	small	0.136797	small	0.296498	small	0.300715	small	0.0478039	small	0.361114	small	0.115884	small	0.129651	small	0.637031	medium	0.253667	small	0.322357	small	0.0683482	small	0.0816111	small	0.622968	medium	-0.0692657	small	0.238614	small	-0.26262	small
60	801.212	3	3706.32	-0.414782	small	-0.148481	small	-0.141061	small	-0.35462	small	-0.106829	small	-0.31375	small	-0.325	small	0.19711	small	0.269557	small	0.278336	small	0.0680503	small	0.304691	small	0.0944715	small	0.121945	small	0.598256	medium	0.207609	small	0.239962	small	0.0260361	small	0.0493775	small	0.556616	medium	-0.0360517	small	0.206097	small	-0.209134	small
61	803.462	2	4836.03	-0.382355	small	-0.119431	small	-0.111104	small	-0.316193	small	-0.0805776	small	-0.272705	small	-0.310538	small	0.232227	small	0.2682	small	0.275493	small	0.0755131	small	0.299327	small	0.104381	small	0.103748	small	0.59355	medium	0.197642	small	0.229774	small	0.0288411	small	0.022218	small	0.55076	medium	-0.0324762	small	0.19168	small	-0.223651	small
62	805.486	3	3511.89	-0.250886	small	0.0289653	small	0.0252095	small	0.0580612	small	0.0300932	small	-0.04018	small	-0.176901	small	0.280129	small	0.284684	small	0.276852	small	0.280516	small	0.278734	small	0.196928	small	0.0916061	small	0.505848	medium	-0.0325515	small	-0.0299074	small	-0.0897359	small	-0.230426	small	0.212359	small	-0.00370909	small	0.0686467	small	-0.211655	small
63	806.465	3	3923.22	-0.225196	small	0.166912	small	0.137391	small	0.496048	small	0.139794	small	0.104863	small	-0.0398467	small	0.342094	small	0.388639	small	0.357132	small	0.635828	medium	0.354013	small	0.301592	small	0.190709	small	0.537601	medium	-0.360738	small	-0.373676	small	-0.344637	small	-0.543222	medium	-0.182357	small	0.00405374	small	0.0227545	small	-0.185371	small
64	807.458	4	706.204	-0.0935489	small	0.264748	small	0.239079	small	0.553479	medium	0.249981	small	0.214999	small	0.131567	small	0.374986	small	0.350121	small	0.322635	small	0.585584	medium	0.326707	small	0.285724	small	0.21567	small	0.443072	small	-0.310368	small	-0.316969	small	-0.296599	small	-0.427579	small	-0.196703	small	-0.000323908	small	0.0165141	small	-0.119421	small
65	808.029	2	4649.06	-0.500396	medium	-0.13008	small	-0.132903	small	-0.284287	small	-0.0720382	small	-0.334553	small	-0.305601	small	0.216571	small	0.378027	small	0.368777	small	0.217973	small	0.426111	small	0.156367	small	0.226208	small	0.693898	medium	0.139913	small	0.210196	small	-0.061108	small	-0.0103486	small	0.501983	medium	-0.0635597	small	0.262777	small	-0.230792	small
66	810.324	2	4762.22	-0.555345	medium	-0.213184	small	-0.215326	small	-0.509437	medium	-0.11537	small	-0.413259	small	-0.414145	small	0.147526	small	0.346932	small	0.342117	small	0.0688455	small	0.43986	small	0.135559	small	0.179541	small	0.687013	medium	0.274343	small	0.38837	small	0.0678141	small	0.111982	small	0.659938	medium	-0.104775	small	0.299592	small	-0.294156	small
67	813.354	2	4034.83	-0.54814	medium	-0.23579	small	-0.233218	small	-0.474977	small	-0.172357	small	-0.434165	small	-0.428392	small	0.130081	small	0.318882	small	0.318605	small	0.0924625	small	0.379926	small	0.109052	small	0.157849	small	0.669794	medium	0.224862	small	0.298413	small	0.0173404	small	0.0621405	small	0.616476	medium	-0.0674079	small	0.26682	small	-0.249829	small
68	815.456	3	3462.84	-0.399591	small	-0.061824	small	-0.0574603	small	-0.240355	small	-0.0105495	small	-0.221424	small	-0.205357	small	0.240928	small	0.347933	small	0.348437	small	0.154866	small	0.389687	small	0.170574	small	0.215809	small	0.622163	medium	0.181452	small	0.232624	small	0.0130246	small	0.0480069	small	0.480421	small	-0.0475312	small	0.212355	small	-0.198329	small
69	816.473	2	6632.98	0.242429	small	0.539406	medium	0.517905	medium	0.873785	large	0.598952	medium	0.507703	medium	0.593933	medium	0.569974	medium	0.292301	small	0.267237	small	0.493167	small	0.279348	small	0.22341	small	0.304045	small	0.268707	small	-0.240365	small	-0.274727	small	-0.276096	small	-0.184275	small	-0.255371	small	0.0078797	small	0.0368339	small	0.0573082	small
70	817.467	5	499.218	0.625543	medium	0.701249	medium	0.668228	medium	1.23552	very large	0.8445	large	0.814167	large	0.830766	large	0.580067	medium	0.169408	small	0.119243	small	0.475382	small	0.221529	small	0.187244	small	0.207769	small	-0.0202017	small	-0.332867	small	-0.233932	small	-0.268478	small	-0.245113	small	-0.47733	small	-0.0966291	small	0.0338319	small	-0.012606	small
71	818.774	3	3510.78	-0.470493	small	-0.15456	small	-0.135221	small	-0.404107	small	-0.129233	small	-0.358762	small	-0.258558	small	0.197841	small	0.324154	small	0.340382	small	0.0797061	small	0.345916	small	0.106038	small	0.236336	small	0.657586	medium	0.260021	small	0.274849	small	0.0267443	small	0.159656	small	0.615398	medium	-0.0104656	small	0.234867	small	-0.126661	small
72	819.452	5	238.481	0.264359	small	0.431682	small	0.455885	small	0.534117	medium	0.348983	small	0.41719	small	0.574359	medium	0.435891	small	0.169614	small	0.194804	small	0.231057	small	0.0638555	small	0.149664	small	0.287068	small	0.152045	small	-0.0315455	small	-0.186442	small	-0.0694081	small	0.0605612	small	-0.0851644	small	0.139152	small	-0.097257	small	0.241308	small
73	821.449	2	5480.01	-0.518001	medium	-0.232379	small	-0.219308	small	-0.488163	small	-0.195932	small	-0.423046	small	-0.385429	small	0.120528	small	0.291057	small	0.303977	small	0.0476748	small	0.328049	small	0.0927204	small	0.168242	small	0.628639	medium	0.25716	small	0.288804	small	0.0449597	small	0.122562	small	0.613286	medium	-0.0301385	small	0.233011	small	-0.182106	small
74	821.455	5	172.002	0.120558	small	0.314359	small	0.292702	small	0.440328	small	0.352103	small	0.261851	small	0.302885	small	0.329983	small	0.192067	small	0.169127	small	0.295849	small	0.218648	small	0.135465	small	0.171602	small	0.197087	small	-0.131267	small	-0.0839752	small	-0.155228	small	-0.130348	small	-0.107457	small	-0.0485283	small	0.0774283	small	-0.0473645	small
75	822.341	3	2930.87	-0.516399	medium	-0.288123	small	-0.273075	small	-0.571525	medium	-0.2598	small	-0.44825	small	-0.493179	small	0.077443	small	0.223811	small	0.239936	small	-0.0263209	small	0.261898	small	0.0619095	small	0.0623576	small	0.583101	medium	0.272189	small	0.299501	small	0.0881804	small	0.094853	small	0.646504	medium	-0.0244065	small	0.195964	small	-0.219809	small
76	824.481	2	7146.87	-0.351098	small	-0.940067	large	-0.803898	large	-0.87126	large	-0.994001	large	-0.882679	large	-0.987087	large	-0.38856	small	-0.52047	medium	-0.410733	small	-0.577083	medium	-0.670553	medium	-0.555382	medium	-0.667726	medium	-0.0196881	small	0.253019	small	-0.0149793	small	0.0728859	small	-0.0296989	small	0.633702	medium	0.278259	small	-0.0935657	small	-0.0161852	small
77	825.485	5	362.577	-0.114854	small	-0.735332	medium	-0.620614	medium	-0.577532	medium	-0.793456	medium	-0.638843	medium	-0.713848	medium	-0.35047	small	-0.647029	medium	-0.537677	medium	-0.559855	medium	-0.811608	large	-0.615136	medium	-0.710399	medium	-0.264357	small	0.0843428	small	-0.235694	small	-0.00974577	small	-0.115514	small	0.277935	small	0.269853	small	-0.212895	small	0.112058	small
78	826.344	3	3404.21	-0.575367	medium	-0.379888	small	-0.361204	small	-0.662916	medium	-0.369773	small	-0.555394	medium	-0.600564	medium	0.0154088	small	0.186439	small	0.207083	small	-0.0643539	small	0.217677	small	0.0135721	small	0.0123859	small	0.592933	medium	0.276519	small	0.290301	small	0.0766559	small	0.0832279	small	0.687602	medium	-0.00918099	small	0.201051	small	-0.22039	small
79	829.431	2	7750.09	-0.500764	medium	-0.199071	small	-0.187511	small	-0.415175	small	-0.163725	small	-0.374055	small	-0.370468	small	0.158557	small	0.313198	small	0.322601	small	0.0938888	small	0.347354	small	0.124351	small	0.164075	small	0.654764	medium	0.224464	small	0.257272	small	0.0294078	small	0.0647609	small	0.58696	medium	-0.0294428	small	0.219303	small	-0.206201	small
80	830.474	5	250.834	0.200637	small	0.405292	small	0.383826	small	0.5604	medium	0.424905	small	0.388609	small	0.356662	small	0.422205	small	0.196333	small	0.174981	small	0.323029	small	0.200335	small	0.175542	small	0.13891	small	0.201183	small	-0.160749	small	-0.145031	small	-0.146544	small	-0.200587	small	-0.136155	small	-0.0225935	small	0.014366	small	-0.0615529	small
81	831.503	5	593.012	0.676281	medium	0.748371	medium	0.773994	medium	1.46202	very large	0.72775	medium	0.938047	large	1.03319	large	0.631315	medium	0.173646	small	0.165899	small	0.650568	medium	0.0260209	small	0.218821	small	0.346612	small	-0.063935	small	-0.512881	medium	-0.649769	medium	-0.448223	small	-0.29289	small	-0.741943	medium	0.143254	small	-0.199034	small	0.331176	small
82	831.814	2	6551.65	-0.3429	small	0.0254268	small	0.0397466	small	-0.0543196	small	0.0142825	small	-0.13534	small	-0.0485045	small	0.30273	small	0.379563	small	0.388491	small	0.264262	small	0.359681	small	0.19638	small	0.300408	small	0.627405	medium	0.0934552	small	0.0696343	small	-0.0750585	small	0.0089519	small	0.352485	small	0.0263059	small	0.151033	small	-0.0648901	small
83	835.058	3	3798.59	-0.480324	small	-0.174258	small	-0.158843	small	-0.400785	small	-0.143988	small	-0.326416	small	-0.325425	small	0.154004	small	0.318468	small	0.32893	small	0.0947657	small	0.345244	small	0.148631	small	0.183535	small	0.625934	medium	0.23335	small	0.26068	small	0.0554343	small	0.0878132	small	0.566743	medium	-0.0200949	small	0.190491	small	-0.181347	small
84	836.189	3	3410.88	-0.13448	small	0.165524	small	0.113054	small	0.423805	small	0.245793	small	0.06738	small	0.129848	small	0.149192	small	0.286888	small	0.23592	small	0.556676	medium	0.382062	small	0.195906	small	0.252151	small	0.285666	small	-0.289734	small	-0.179585	small	-0.327933	small	-0.252615	small	-0.274093	small	-0.117403	small	0.167144	small	-0.0971399	small
85	836.455	1	14370.5	0.0365957	small	0.229607	small	0.178458	small	0.514199	medium	0.297162	small	0.206809	small	0.239337	small	0.100343	small	0.200727	small	0.149448	small	0.517489	medium	0.280561	small	0.18419	small	0.217249	small	0.0702969	small	-0.329987	small	-0.226641	small	-0.294602	small	-0.24427	small	-0.424799	small	-0.106581	small	0.0827183	small	-0.0400609	small
86	837.462	2	5947.74	0.0372284	small	0.259398	small	0.210668	small	0.478018	small	0.349672	small	0.217642	small	0.263697	small	0.169705	small	0.226153	small	0.177282	small	0.451733	small	0.318732	small	0.184936	small	0.231338	small	0.136183	small	-0.241634	small	-0.12059	small	-0.231097	small	-0.186455	small	-0.302118	small	-0.12337	small	0.118735	small	-0.073326	small
87	837.562	5	37.5897	0.102845	small	0.244713	small	0.204121	small	0.498597	small	0.289727	small	0.167723	small	0.244508	small	0.208164	small	0.142403	small	0.100421	small	0.374444	small	0.180645	small	0.0612514	small	0.136778	small	0.100827	small	-0.28033	small	-0.192742	small	-0.320202	small	-0.236196	small	-0.279103	small	-0.0824787	small	0.122025	small	-0.0437152	small
88	838.46	2	5921.01	-0.3465	small	-0.693787	medium	-0.604912	medium	-0.581147	medium	-0.706935	medium	-0.651273	medium	-0.685366	medium	-0.317321	small	-0.298242	small	-0.235439	small	-0.323383	small	-0.427324	small	-0.368251	small	-0.406751	small	0.0477349	small	0.106541	small	-0.076933	small	-0.0458333	small	-0.0734254	small	0.397974	small	0.176984	small	-0.0192395	small	-0.00488374	small
89	839.466	3	1795.82	-0.347593	small	-0.483786	small	-0.446975	small	-0.3445	small	-0.582297	medium	-0.597337	medium	-0.568811	medium	-0.163778	small	-0.109643	small	-0.0840077	small	-0.000193331	small	-0.222188	small	-0.257349	small	-0.221091	small	0.205829	small	-0.0846753	small	-0.235408	small	-0.261527	small	-0.227714	small	0.211874	small	0.13162	small	0.0572446	small	-0.0111981	small
90	840.488	2	5069.81	-0.246	small	0.141018	small	0.0979567	small	0.297925	small	0.226885	small	0.001009	small	0.0679658	small	0.225462	small	0.367081	small	0.319017	small	0.531324	medium	0.459379	small	0.224756	small	0.300331	small	0.444652	small	-0.164483	small	-0.0614727	small	-0.259596	small	-0.212541	small	-0.0479996	small	-0.109397	small	0.205799	small	-0.150613	small
91	841.491	3	1603.7	-0.312285	small	0.109197	small	0.0754279	small	0.110731	small	0.212168	small	-0.0151143	small	-0.046221	small	0.27687	small	0.411693	small	0.371406	small	0.408936	small	0.504833	medium	0.273932	small	0.264912	small	0.558575	medium	-0.0262691	small	0.106181	small	-0.113762	small	-0.157958	small	0.171273	small	-0.124808	small	0.211027	small	-0.256343	small
92	842.528	2	7499.96	0.135217	small	0.0988703	small	0.0815002	small	0.182499	small	0.125065	small	0.132056	small	0.0826561	small	0.0620944	small	-0.0161147	small	-0.0225508	small	0.0700722	small	-0.0175486	small	-0.0146802	small	0.00089692	small	-0.0908331	small	-0.0594455	small	-0.0962795	small	-0.110622	small	-0.0256571	small	-0.170086	small	-0.0120902	small	-0.00450898	small	0.00923755	small
93	843.528	4	1376.2	0.156924	small	0.113883	small	0.0957671	small	0.195324	small	0.149318	small	0.162212	small	0.0936832	small	0.0803156	small	-0.0156285	small	-0.0207653	small	0.0540308	small	-0.0172931	small	-0.00886308	small	0.00185358	small	-0.0890864	small	-0.04825	small	-0.0818433	small	-0.0890211	small	-0.0181449	small	-0.148489	small	-0.0109014	small	-0.0108696	small	0.0097847	small
94	845.123	2	5399.32	-0.234451	small	-0.00612432	small	-0.0191604	small	-0.190125	small	0.112578	small	-0.122559	small	-0.102571	small	0.180439	small	0.195084	small	0.165494	small	0.0557877	small	0.376751	small	0.126215	small	0.0547179	small	0.420343	small	0.12159	small	0.364071	small	0.0781752	small	0.0186207	small	0.391581	small	-0.103394	small	0.265416	small	-0.173552	small
95	847.308	2	4130.49	-0.477765	small	-0.210392	small	-0.214598	small	-0.518982	medium	-0.0979426	small	-0.33878	small	-0.461068	small	0.121928	small	0.276367	small	0.269219	small	-0.00795472	small	0.381887	small	0.13489	small	0.0573153	small	0.590193	medium	0.286126	small	0.418803	small	0.14763	small	0.071103	small	0.651639	medium	-0.120161	small	0.243677	small	-0.36133	small
96	847.465	5	188.32	0.221577	small	0.328494	small	0.296408	small	0.490191	small	0.383282	small	0.455047	small	0.142865	small	0.306449	small	0.103155	small	0.0720608	small	0.23561	small	0.139513	small	0.22247	small	-0.0867828	small	0.0690295	small	-0.171771	small	-0.111864	small	-0.00435352	small	-0.350568	small	-0.182843	small	-0.0663691	small	-0.0999208	small	-0.242341	small
97	849.467	2	6327.16	-0.0986573	small	0.229231	small	0.215162	small	0.14326	small	0.297089	small	0.102412	small	0.112812	small	0.420812	small	0.326046	small	0.307463	small	0.218163	small	0.371461	small	0.186501	small	0.203537	small	0.483317	small	0.0690246	small	0.149552	small	-0.035384	small	-0.0386033	small	0.27515	small	-0.0755131	small	0.179327	small	-0.196351	small
98	850.506	3	2993.19	0.121635	small	0.496933	small	0.588547	medium	0.697246	medium	0.36806	small	0.299643	small	0.964971	large	0.654192	medium	0.38871	small	0.462141	small	0.52223	medium	0.225735	small	0.153318	small	0.783286	medium	0.466166	small	-0.129883	small	-0.335062	small	-0.418112	small	0.179779	small	-0.20313	small	0.251942	small	0.0861802	small	0.58225	medium
99	851.499	3	2042.4	-0.178556	small	0.314047	small	0.358987	small	0.37239	small	0.197764	small	-0.0068534	small	0.611764	medium	0.514619	medium	0.46944	small	0.50867	medium	0.484201	small	0.352714	small	0.159102	small	0.720227	medium	0.647318	medium	-0.00703012	small	-0.175838	small	-0.33953	small	0.208291	small	0.0975727	small	0.171809	small	0.190404	small	0.408783	small
100	852.448	1	9713.19	0.088489	small	0.216678	small	0.17972	small	0.426196	small	0.234533	small	0.257881	small	0.201119	small	0.0796931	small	0.139444	small	0.103404	small	0.415873	small	0.174358	small	0.202606	small	0.137419	small	-0.00480836	small	-0.269708	small	-0.236567	small	-0.191659	small	-0.220734	small	-0.379928	small	-0.0497471	small	-0.0343247	small	-0.016604	small
101	852.612	5	200.344	0.107557	small	0.270001	small	0.244808	small	0.546547	medium	0.248399	small	0.260169	small	0.284193	small	0.19032	small	0.164982	small	0.138884	small	0.44908	small	0.143251	small	0.156831	small	0.181243	small	0.0826679	small	-0.321949	small	-0.31511	small	-0.288564	small	-0.265251	small	-0.38341	small	-0.00224389	small	-0.0169611	small	0.0416406	small
102	853.454	2	6695.74	0.0163331	small	0.228451	small	0.190315	small	0.417953	small	0.262195	small	0.241464	small	0.179484	small	0.152055	small	0.219854	small	0.182286	small	0.459249	small	0.272269	small	0.245703	small	0.178302	small	0.149217	small	-0.227327	small	-0.181493	small	-0.171005	small	-0.234656	small	-0.27899	small	-0.0625968	small	0.00701848	small	-0.0731927	small
103	854.507	3	3475.74	-0.31006	small	-0.070639	small	-0.0601897	small	-0.245686	small	-0.040253	small	-0.139505	small	-0.172406	small	0.128464	small	0.236557	small	0.236282	small	0.0802608	small	0.277007	small	0.137846	small	0.139931	small	0.44436	small	0.163714	small	0.215015	small	0.0686287	small	0.0662181	small	0.402028	small	-0.0232862	small	0.104872	small	-0.136587	small
104	855.482	5	256.53	0.34309	small	0.423911	small	0.400352	small	0.546794	medium	0.402809	small	0.487799	small	0.412136	small	0.288732	small	0.0713068	small	0.059585	small	0.222624	small	0.0501203	small	0.1685	small	0.0827719	small	-0.0721562	small	-0.151124	small	-0.187014	small	-0.0348411	small	-0.1271	small	-0.315964	small	0.0136214	small	-0.129333	small	0.0384844	small
105	856.079	5	25.5593	-0.312978	small	-0.182002	small	-0.158336	small	-0.402085	small	-0.169029	small	-0.215381	small	-0.23361	small	-0.0314504	small	0.125847	small	0.144672	small	-0.0886616	small	0.1423	small	0.0714318	small	0.0759213	small	0.299639	small	0.225092	small	0.231719	small	0.145267	small	0.163908	small	0.409305	small	0.00754605	small	0.0578143	small	-0.0650432	small
106	858.299	1	9664.36	-0.422935	small	-0.116995	small	-0.118847	small	-0.320808	small	-0.0412717	small	-0.252942	small	-0.30692	small	0.189547	small	0.316841	small	0.308412	small	0.115336	small	0.383152	small	0.160756	small	0.139367	small	0.599921	medium	0.190801	small	0.282703	small	0.0481602	small	0.0185956	small	0.525432	medium	-0.079673	small	0.214133	small	-0.268253	small
107	858.473	5	390.773	0.346359	small	0.478582	small	0.421313	small	0.664994	medium	0.667954	medium	0.480972	small	0.436632	small	0.420239	small	0.161733	small	0.0969171	small	0.265642	small	0.315833	small	0.143392	small	0.0692868	small	0.0810607	small	-0.155183	small	0.0692431	small	-0.0996439	small	-0.210674	small	-0.169633	small	-0.220675	small	0.161967	small	-0.261971	small
108	859.474	5	282.029	0.155878	small	0.367725	small	0.322568	small	0.425697	small	0.511695	medium	0.325571	small	0.272129	small	0.396035	small	0.20781	small	0.160494	small	0.22898	small	0.32624	small	0.157757	small	0.0985593	small	0.215587	small	-0.0700796	small	0.106859	small	-0.061061	small	-0.144231	small	-0.0148836	small	-0.175271	small	0.161375	small	-0.244609	small
109	860.627	2	4794.47	-0.417806	small	-0.163485	small	-0.156805	small	-0.427827	small	-0.102109	small	-0.28937	small	-0.316703	small	0.118326	small	0.238246	small	0.229086	small	0.0286528	small	0.323556	small	0.116661	small	0.0724218	small	0.516335	medium	0.205744	small	0.330048	small	0.0938444	small	0.0472907	small	0.544106	medium	-0.0687768	small	0.195774	small	-0.226176	small
110	861.097	5	107.069	-0.177817	small	-0.0440463	small	-0.0389563	small	-0.185529	small	-0.0155984	small	-0.0537284	small	-0.147472	small	0.0516868	small	0.106717	small	0.117691	small	-0.0323455	small	0.142446	small	0.107188	small	0.0377454	small	0.207891	small	0.134893	small	0.146315	small	0.116299	small	0.0663384	small	0.201182	small	-0.0216704	small	0.0340507	small	-0.115029	small
111	861.473	5	214.362	0.0620359	small	0.116571	small	0.105549	small	0.141287	small	0.110195	small	0.121568	small	0.0753719	small	0.108782	small	0.0564704	small	0.0497673	small	0.115112	small	0.0601795	small	0.0760533	small	0.0212237	small	0.0615209	small	-0.0385004	small	-0.0513107	small	-0.0272532	small	-0.0718372	small	-0.0256453	small	-0.000245828	small	-0.0190314	small	-0.0312908	small
112	863.428	2	5316.01	-0.494455	small	-0.18817	small	-0.173931	small	-0.403451	small	-0.15836	small	-0.335521	small	-0.378652	small	0.163874	small	0.317958	small	0.329108	small	0.101445	small	0.34476	small	0.152499	small	0.154275	small	0.65143	medium	0.225024	small	0.249148	small	0.0518528	small	0.0466444	small	0.57732	medium	-0.0200311	small	0.18529	small	-0.217905	small
113	864.547	3	2026.86	-0.455191	small	-0.149698	small	-0.132586	small	-0.35307	small	-0.133944	small	-0.304945	small	-0.276315	small	0.15348	small	0.298936	small	0.315408	small	0.109319	small	0.313497	small	0.151641	small	0.180313	small	0.596868	medium	0.207218	small	0.208494	small	0.0428397	small	0.0719427	small	0.501172	medium	-0.000446218	small	0.165486	small	-0.137422	small
114	865.437	2	5151.19	-0.512531	medium	-0.225081	small	-0.209956	small	-0.474551	small	-0.189254	small	-0.380313	small	-0.409644	small	0.132578	small	0.299778	small	0.314495	small	0.0538841	small	0.331403	small	0.132039	small	0.140385	small	0.643597	medium	0.261885	small	0.286622	small	0.0788721	small	0.0867821	small	0.624219	medium	-0.0245301	small	0.197526	small	-0.215663	small
115	867.491	4	858.708	-0.488344	small	-0.217254	small	-0.209317	small	-0.44431	small	-0.165036	small	-0.382221	small	-0.369808	small	0.100579	small	0.283592	small	0.29091	small	0.0568627	small	0.330695	small	0.107373	small	0.148161	small	0.592535	medium	0.234711	small	0.282287	small	0.0509082	small	0.0918995	small	0.563496	medium	-0.0469673	small	0.222982	small	-0.202751	small
116	868.476	1	11342.2	-0.113712	small	0.179031	small	0.124978	small	0.363266	small	0.270626	small	0.101876	small	0.168311	small	0.105888	small	0.29361	small	0.23926	small	0.568387	medium	0.428609	small	0.233897	small	0.298976	small	0.235892	small	-0.231528	small	-0.10094	small	-0.264933	small	-0.179162	small	-0.258429	small	-0.138048	small	0.169276	small	-0.0901312	small
117	869.48	3	1567.3	-0.0155812	small	0.258816	small	0.207414	small	0.468447	small	0.33904	small	0.211618	small	0.26262	small	0.159154	small	0.280829	small	0.229805	small	0.557554	medium	0.386646	small	0.245124	small	0.300391	small	0.188274	small	-0.2405	small	-0.128884	small	-0.239964	small	-0.190423	small	-0.298961	small	-0.119281	small	0.118083	small	-0.067683	small
118	870.526	2	5966.57	-0.185961	small	0.0710389	small	0.0536845	small	0.0607758	small	0.148172	small	-0.0472311	small	-0.000265444	small	0.258376	small	0.230188	small	0.198992	small	0.243662	small	0.343395	small	0.143215	small	0.117954	small	0.448398	small	0.00737972	small	0.0955919	small	-0.114048	small	-0.0327774	small	0.220399	small	-0.0536049	small	0.20801	small	-0.0886256	small
119	873.372	2	5190.6	-0.416703	small	-0.101157	small	-0.0933399	small	-0.222367	small	-0.0816926	small	-0.257975	small	-0.244272	small	0.209546	small	0.329479	small	0.331652	small	0.188467	small	0.345351	small	0.153812	small	0.193845	small	0.616859	medium	0.128354	small	0.148309	small	-0.0378564	small	-0.0112199	small	0.439011	small	-0.0151392	small	0.184459	small	-0.167442	small
120	873.486	5	299	0.340266	small	0.456493	small	0.433907	small	0.686988	medium	0.490026	small	0.456005	small	0.48355	small	0.41263	small	0.113572	small	0.0883245	small	0.277221	small	0.11943	small	0.0992341	small	0.117056	small	0.0459397	small	-0.202541	small	-0.173336	small	-0.180382	small	-0.170455	small	-0.255201	small	-0.0324691	small	0.0167065	small	-0.00069668	small
121	874.459	3	3045.86	-0.372965	small	-0.0465705	small	-0.0386833	small	-0.229957	small	-0.00677833	small	-0.147908	small	-0.180472	small	0.193463	small	0.322305	small	0.3223	small	0.150333	small	0.361575	small	0.201726	small	0.203959	small	0.541319	medium	0.17454	small	0.221585	small	0.0604077	small	0.0514693	small	0.41312	small	-0.032076	small	0.139366	small	-0.17298	small
122	876.485	2	5398.99	-0.0554708	small	0.173823	small	0.204031	small	-0.0594912	small	0.176707	small	0.228143	small	0.0683027	small	0.336088	small	0.219219	small	0.242479	small	0.00174731	small	0.206188	small	0.245228	small	0.112154	small	0.343263	small	0.251094	small	0.230033	small	0.248695	small	0.123322	small	0.394692	small	0.042092	small	-0.0769477	small	-0.106131	small
123	877.53	3	3201.98	-0.276002	small	-0.0105015	small	0.0280867	small	-0.307499	small	-0.0140863	small	-0.0125996	small	-0.13821	small	0.231306	small	0.271365	small	0.304743	small	-0.0161395	small	0.265227	small	0.240148	small	0.149783	small	0.493769	small	0.330763	small	0.301067	small	0.258244	small	0.177378	small	0.55173	medium	0.0419439	small	-0.00017045	small	-0.12754	small
124	879.381	2	4217	-0.466429	small	-0.230465	small	-0.212971	small	-0.458171	small	-0.210857	small	-0.361201	small	-0.434797	small	0.128965	small	0.245743	small	0.262487	small	0.0230652	small	0.267852	small	0.101634	small	0.071178	small	0.593465	medium	0.241805	small	0.25273	small	0.0787783	small	0.0482654	small	0.602033	medium	-0.00858058	small	0.161579	small	-0.220414	small
125	881.128	2	5248.88	-0.544778	medium	-0.231838	small	-0.228594	small	-0.47447	small	-0.166074	small	-0.408483	small	-0.428505	small	0.120532	small	0.323725	small	0.324197	small	0.0881696	small	0.385794	small	0.130022	small	0.158052	small	0.660662	medium	0.234765	small	0.308871	small	0.0428116	small	0.0666339	small	0.609472	medium	-0.0684633	small	0.24992	small	-0.258667	small
126	882.504	5	231.919	-0.0840262	small	0.201071	small	0.189833	small	0.2043	small	0.232074	small	0.0858485	small	0.155381	small	0.323	small	0.282796	small	0.26943	small	0.271996	small	0.305221	small	0.162209	small	0.232328	small	0.391415	small	-0.012089	small	0.0266787	small	-0.11037	small	-0.0517976	small	0.118624	small	-0.0383004	small	0.138609	small	-0.0787494	small
127	883.1	2	7158.13	-0.512961	medium	-0.210726	small	-0.201423	small	-0.466829	small	-0.153411	small	-0.363557	small	-0.407047	small	0.142376	small	0.316878	small	0.323726	small	0.0619019	small	0.370469	small	0.145652	small	0.14428	small	0.654934	medium	0.262397	small	0.320421	small	0.0845341	small	0.0816227	small	0.630649	medium	-0.0531821	small	0.219575	small	-0.254783	small
128	886.463	2	5522.45	-0.349018	small	0.0735096	small	0.0102342	small	0.183363	small	0.220872	small	-0.100518	small	-0.0573574	small	0.167958	small	0.425986	small	0.351388	small	0.575714	medium	0.605046	medium	0.244712	small	0.3057	small	0.509394	medium	-0.166867	small	0.040011	small	-0.289577	small	-0.260345	small	-0.0024345	small	-0.203559	small	0.328116	small	-0.294006	small
129	886.52	5	618.123	0.0398209	small	0.291071	small	0.201625	small	0.580556	medium	0.445107	small	0.212132	small	0.241143	small	0.154916	small	0.26346	small	0.17304	small	0.638728	medium	0.451435	small	0.196183	small	0.227565	small	0.130005	small	-0.38258	small	-0.135648	small	-0.397052	small	-0.35513	small	-0.401261	small	-0.246632	small	0.247851	small	-0.21222	small
130	887.484	2	6312.06	-0.3852	small	-0.0385362	small	-0.092773	small	-0.0343398	small	0.123914	small	-0.241134	small	-0.241005	small	0.179781	small	0.349984	small	0.288192	small	0.338511	small	0.499324	small	0.131917	small	0.164832	small	0.54306	medium	-0.0596244	small	0.161075	small	-0.200323	small	-0.21005	small	0.214023	small	-0.209534	small	0.355203	small	-0.371604	small
131	888.478	5	337.992	0.228018	small	0.432024	small	0.398771	small	0.718356	medium	0.471829	small	0.395789	small	0.468392	small	0.369798	small	0.206162	small	0.169594	small	0.44237	small	0.226397	small	0.159982	small	0.223202	small	0.126106	small	-0.280752	small	-0.223835	small	-0.273343	small	-0.224504	small	-0.337566	small	-0.056944	small	0.0605442	small	-0.00220702	small
132	890.469	2	4908.02	-0.408473	small	-0.0773175	small	-0.051429	small	-0.299859	small	-0.0746347	small	-0.202913	small	-0.183146	small	0.219726	small	0.34086	small	0.359827	small	0.117102	small	0.340138	small	0.190735	small	0.244232	small	0.613113	medium	0.241154	small	0.230695	small	0.0771234	small	0.12777	small	0.526442	medium	0.0202913	small	0.134223	small	-0.109692	small
133	892.517	2	7287.82	-0.369909	small	0.0926066	small	0.0857681	small	-0.0783826	small	0.177069	small	-0.0761364	small	-0.00276524	small	0.339808	small	0.460076	small	0.443208	small	0.27973	small	0.520294	medium	0.265766	small	0.358379	small	0.668874	medium	0.156846	small	0.253146	small	-0.00396627	small	0.0745677	small	0.418739	small	-0.0811456	small	0.23449	small	-0.178113	small
134	893.511	5	515.184	0.488617	small	0.740379	medium	0.701929	medium	1.18251	large	0.911446	large	0.900949	large	0.779491	medium	0.61089	medium	0.310803	small	0.254619	small	0.592664	medium	0.403482	small	0.413247	small	0.267813	small	0.0991761	small	-0.324186	small	-0.177355	small	-0.137991	small	-0.324122	small	-0.516434	medium	-0.142157	small	-0.0287419	small	-0.141444	small
135	894.473	2	7408.95	-0.340402	small	0.0178431	small	0.0198349	small	-0.130511	small	0.0664052	small	-0.0601357	small	-0.165598	small	0.27585	small	0.372035	small	0.36554	small	0.205909	small	0.401971	small	0.262199	small	0.193117	small	0.592859	medium	0.147792	small	0.201325	small	0.0609472	small	-0.0311734	small	0.415526	small	-0.0445178	small	0.123026	small	-0.238782	small
136	898.532	1	11195.8	-0.246672	small	0.180011	small	0.138856	small	0.310359	small	0.274646	small	0.08282	small	0.106816	small	0.238488	small	0.402598	small	0.356731	small	0.53929	medium	0.503351	medium	0.300569	small	0.333033	small	0.458503	small	-0.13364	small	-0.0259382	small	-0.18778	small	-0.17882	small	-0.0500435	small	-0.110845	small	0.167363	small	-0.15389	small
137	899.534	3	3242.38	-0.275601	small	0.11969	small	0.0807021	small	0.230974	small	0.201853	small	-0.00340079	small	0.0370468	small	0.20695	small	0.380026	small	0.337437	small	0.499969	small	0.46328	small	0.249342	small	0.30548	small	0.465169	small	-0.129734	small	-0.0197951	small	-0.207582	small	-0.18798	small	-0.0124901	small	-0.110337	small	0.188601	small	-0.161424	small
138	900.523	2	4677.7	-0.235776	small	-0.138425	small	-0.12723	small	-0.192928	small	-0.161176	small	-0.256448	small	-0.251373	small	0.108441	small	0.101439	small	0.109454	small	0.049274	small	0.0887148	small	-0.0149211	small	0.00242996	small	0.329464	small	0.0578715	small	0.0375126	small	-0.0654845	small	-0.052338	small	0.295561	small	0.02309	small	0.106864	small	-0.093835	small
139	902.203	2	7316.66	-0.510668	medium	-0.355203	small	-0.334259	small	-0.606999	medium	-0.355416	small	-0.516224	medium	-0.565602	medium	0.0298214	small	0.167508	small	0.187331	small	-0.0481936	small	0.178772	small	0.0058605	small	0.00201417	small	0.538787	medium	0.247183	small	0.245945	small	0.0557055	small	0.0584831	small	0.65112	medium	0.00596971	small	0.176803	small	-0.198298	small
140	905.36	2	4752.3	-0.108559	small	0.179505	small	0.17959	small	0.135918	small	0.186379	small	0.136232	small	0.0841572	small	0.30886	small	0.291394	small	0.286169	small	0.221641	small	0.281468	small	0.227092	small	0.187107	small	0.393605	small	0.0399697	small	0.0458607	small	0.00450574	small	-0.058643	small	0.173338	small	-0.00397163	small	0.0380197	small	-0.107629	small
141	906.295	2	4381.92	-0.186653	small	0.039725	small	0.0533539	small	-0.0305015	small	0.0208203	small	-0.0128489	small	0.018623	small	0.154823	small	0.24535	small	0.251667	small	0.165847	small	0.227963	small	0.17872	small	0.198448	small	0.375887	small	0.0878144	small	0.0603983	small	0.0184218	small	0.0481461	small	0.226158	small	0.0351804	small	0.0362829	small	8.49533e-05	small
142	908.514	2	7590.41	-0.352136	small	0.122706	small	0.103226	small	0.177457	small	0.156761	small	0.00166994	small	0.0225659	small	0.28035	small	0.488746	small	0.456769	small	0.495674	small	0.499286	small	0.332243	small	0.372897	small	0.608592	medium	-0.0685294	small	-0.0225979	small	-0.162423	small	-0.160568	small	0.107934	small	-0.048059	small	0.146982	small	-0.137417	small
143	909.516	5	526.385	0.408367	small	0.565252	medium	0.533532	medium	1.09206	large	0.571091	medium	0.672549	medium	0.617462	medium	0.403611	small	0.176509	small	0.138521	small	0.580979	medium	0.144812	small	0.251212	small	0.188383	small	-0.0172783	small	-0.440465	small	-0.443979	small	-0.305821	small	-0.394082	small	-0.629235	medium	-0.00427406	small	-0.113765	small	0.0451777	small
144	910.459	2	4094.84	-0.412602	small	-0.0843214	small	-0.0868	small	-0.236389	small	-0.020708	small	-0.222629	small	-0.254219	small	0.202041	small	0.350825	small	0.341241	small	0.178901	small	0.399948	small	0.188029	small	0.186258	small	0.605723	medium	0.150614	small	0.225922	small	0.00741931	small	-0.00785015	small	0.453162	small	-0.0678218	small	0.208216	small	-0.2429	small
145	911.705	4	1409.54	-0.303781	small	0.0282638	small	0.0212863	small	-0.166874	small	0.120229	small	-0.0876566	small	-0.125462	small	0.266207	small	0.343665	small	0.331438	small	0.1392	small	0.419507	small	0.205931	small	0.193376	small	0.556839	medium	0.188117	small	0.294656	small	0.0704436	small	0.0483889	small	0.44519	small	-0.0971309	small	0.203935	small	-0.255401	small
146	912.68	3	2803.29	-0.201052	small	-0.0394811	small	-0.0397449	small	-0.0545044	small	-0.0272963	small	-0.0990443	small	-0.10364	small	0.0897246	small	0.190119	small	0.175088	small	0.151544	small	0.195952	small	0.0899052	small	0.116739	small	0.299503	small	0.0136765	small	0.0372012	small	-0.0511145	small	-0.0551291	small	0.177452	small	-0.0158849	small	0.0843268	small	-0.092121	small
147	913.147	3	2777.65	-0.23444	small	-0.0260414	small	-0.0393342	small	0.00564964	small	0.00443298	small	-0.143261	small	-0.15776	small	0.185809	small	0.236795	small	0.212356	small	0.231941	small	0.253971	small	0.0889696	small	0.0995436	small	0.419038	small	-0.0460539	small	-0.00171017	small	-0.146712	small	-0.176535	small	0.201825	small	-0.0458805	small	0.158854	small	-0.182284	small
148	915.528	2	5413.71	-0.259797	small	0.0881308	small	0.090983	small	0.062976	small	0.0864951	small	-0.0529563	small	-0.0197631	small	0.341032	small	0.364876	small	0.359269	small	0.297655	small	0.344314	small	0.198683	small	0.246321	small	0.575851	medium	0.026575	small	0.020829	small	-0.110114	small	-0.0868364	small	0.283049	small	0.00686237	small	0.138328	small	-0.112176	small
149	916.671	2	4595.21	-0.435632	small	-0.0843175	small	-0.0813832	small	-0.277965	small	-0.0214982	small	-0.26196	small	-0.230025	small	0.235611	small	0.371899	small	0.367123	small	0.163092	small	0.423018	small	0.170588	small	0.23051	small	0.663533	medium	0.196277	small	0.268589	small	0.00711448	small	0.0594541	small	0.533819	medium	-0.0616172	small	0.247615	small	-0.216986	small
150	917.518	5	260.975	0.0933564	small	0.393552	small	0.349897	small	0.553985	medium	0.486215	small	0.34204	small	0.326038	small	0.394317	small	0.294215	small	0.248726	small	0.425155	small	0.371125	small	0.23538	small	0.217579	small	0.282693	small	-0.193788	small	-0.0646131	small	-0.187943	small	-0.227413	small	-0.162866	small	-0.128999	small	0.129079	small	-0.162568	small
151	919.286	2	5325.58	-0.541879	medium	-0.183031	small	-0.186232	small	-0.409219	small	-0.0967977	small	-0.371216	small	-0.379523	small	0.166752	small	0.37325	small	0.364076	small	0.142517	small	0.454414	small	0.16452	small	0.1977	small	0.70318	medium	0.215681	small	0.32115	small	0.0222249	small	0.0465435	small	0.591534	medium	-0.0943372	small	0.282784	small	-0.287949	small
152	919.508	5	340.065	0.336863	small	0.522084	medium	0.509422	medium	0.861495	large	0.558831	medium	0.516242	medium	0.634817	medium	0.475581	small	0.21903	small	0.194811	small	0.47556	small	0.216448	small	0.169768	small	0.289796	small	0.136792	small	-0.2798	small	-0.254383	small	-0.305782	small	-0.177719	small	-0.333424	small	-0.0180389	small	0.0488935	small	0.0744022	small
153	920.326	2	5680.94	-0.547913	medium	-0.197666	small	-0.199574	small	-0.368226	small	-0.138725	small	-0.383152	small	-0.382239	small	0.139034	small	0.361546	small	0.35356	small	0.182018	small	0.419809	small	0.158024	small	0.198594	small	0.677176	medium	0.159877	small	0.236308	small	-0.0255664	small	0.00140013	small	0.513067	medium	-0.0682823	small	0.254268	small	-0.246291	small
154	923.483	2	5491.26	-0.539266	medium	-0.226041	small	-0.244084	small	-0.49345	small	-0.0853034	small	-0.400979	small	-0.470164	small	0.103328	small	0.321775	small	0.298704	small	0.0665448	small	0.461367	small	0.132915	small	0.106183	small	0.636523	medium	0.232857	small	0.416431	small	0.0677458	small	0.0370715	small	0.606876	medium	-0.164406	small	0.322856	small	-0.391219	small
155	923.514	5	225.413	0.274699	small	0.498472	small	0.434867	small	0.608273	medium	0.695331	medium	0.517086	medium	0.404571	small	0.417204	small	0.228016	small	0.159396	small	0.303216	small	0.398803	small	0.231986	small	0.118193	small	0.12793	small	-0.150047	small	0.0939525	small	-0.0673092	small	-0.192493	small	-0.187389	small	-0.246177	small	0.161389	small	-0.287855	small
156	925.217	2	4912.3	-0.474079	small	-0.196971	small	-0.200205	small	-0.436472	small	-0.103854	small	-0.334525	small	-0.412192	small	0.119033	small	0.290679	small	0.281063	small	0.0557604	small	0.383369	small	0.135671	small	0.093748	small	0.590396	medium	0.227327	small	0.346936	small	0.0821391	small	0.0366599	small	0.570483	medium	-0.102549	small	0.241562	small	-0.317998	small
157	926.332	3	3702.89	-0.288942	small	-0.130746	small	-0.125247	small	-0.386892	small	-0.0544595	small	-0.193934	small	-0.314956	small	0.116027	small	0.168461	small	0.167378	small	-0.0683696	small	0.24354	small	0.085207	small	0.000136002	small	0.400573	small	0.246874	small	0.349635	small	0.155387	small	0.0790607	small	0.523256	medium	-0.0749024	small	0.147192	small	-0.270633	small
158	927.516	2	5341.47	0.757091	medium	0.342173	small	0.323535	small	0.759935	medium	0.616268	medium	0.422491	small	0.672465	medium	0.421747	small	-0.311315	small	-0.296638	small	-0.209804	small	-0.32945	small	-0.106607	small	-0.266064	small	-0.617223	medium	-0.0786375	small	-0.103662	small	0.0586902	small	-0.0326574	small	-0.549993	medium	-0.00276839	small	-0.134393	small	0.073992	small
159	927.675	5	495.167	0.552025	medium	0.217741	small	0.200613	small	0.4522	small	0.403053	small	0.266291	small	0.357992	small	0.215251	small	-0.212265	small	-0.200337	small	-0.16267	small	-0.250216	small	-0.06756	small	-0.227813	small	-0.438645	small	-0.0473142	small	-0.0670502	small	0.0443187	small	-0.0522602	small	-0.31426	small	-0.00376155	small	-0.0908164	small	0.0080209	small
160	928.523	2	8203.35	0.637819	medium	0.309025	small	0.288712	small	0.541633	medium	0.532707	medium	0.358765	small	0.487677	small	0.356694	small	-0.217736	small	-0.205238	small	-0.200241	small	-0.233148	small	-0.0568325	small	-0.223363	small	-0.458527	small	-0.0154316	small	-0.00416223	small	0.082236	small	-0.00480367	small	-0.309109	small	-0.0134855	small	-0.100357	small	-0.0011022	small
161	929.593	5	139.944	0.623314	medium	0.475349	small	0.443986	small	0.718306	medium	0.602076	medium	0.558929	medium	0.517127	medium	0.405192	small	-0.10712	small	-0.118628	small	-0.0038248	small	-0.0993533	small	0.0422781	small	-0.148027	small	-0.303337	small	-0.117032	small	-0.107212	small	0.0435466	small	-0.15901	small	-0.358353	small	-0.0311047	small	-0.127261	small	-0.0601467	small
162	930.615	3	2869.2	-0.285248	small	-0.0509187	small	-0.0569765	small	-0.209945	small	0.0246231	small	-0.146933	small	-0.218995	small	0.184098	small	0.243184	small	0.231309	small	0.0856278	small	0.310757	small	0.128836	small	0.0827631	small	0.461916	small	0.146998	small	0.242024	small	0.0480735	small	-0.00703896	small	0.409966	small	-0.081321	small	0.171414	small	-0.249635	small
163	931.169	3	2845.38	-0.354964	small	-0.407492	small	-0.380359	small	-0.651818	medium	-0.417968	small	-0.562136	medium	-0.584137	medium	-0.0377765	small	-0.00595369	small	0.0189026	small	-0.186809	small	-0.00253804	small	-0.141005	small	-0.137277	small	0.325084	small	0.250612	small	0.233304	small	0.0571331	small	0.0764877	small	0.646259	medium	0.0236517	small	0.16322	small	-0.161422	small
164	932.177	3	2105.14	-0.0284683	small	-0.553316	medium	-0.493956	small	-0.724615	medium	-0.628411	medium	-0.643107	medium	-0.684682	medium	-0.164757	small	-0.417584	small	-0.35132	small	-0.407282	small	-0.386426	small	-0.403365	small	-0.419618	small	-0.0797453	small	0.25358	small	0.131128	small	0.0677339	small	0.0713312	small	0.641501	medium	0.131373	small	0.0527938	small	-0.061042	small
165	934.523	2	7407.18	-0.204846	small	-1.04665	large	-0.904277	large	-0.91539	large	-1.05516	large	-0.896927	large	-1.01056	large	-0.534879	medium	-0.724185	medium	-0.599666	medium	-0.616669	medium	-0.740604	medium	-0.605302	medium	-0.703841	medium	-0.260974	small	0.250731	small	-0.0344672	small	0.0957176	small	-0.0104459	small	0.670827	medium	0.291074	small	-0.135517	small	0.0223954	small
166	935.523	2	4718.48	-0.425006	small	-1.00309	large	-0.882935	large	-0.847641	large	-1.03262	large	-0.878235	large	-1.01633	large	-0.523248	medium	-0.481298	small	-0.390603	small	-0.459089	small	-0.613118	medium	-0.461827	small	-0.603175	medium	-0.0523691	small	0.148625	small	-0.126595	small	0.0136352	small	-0.130349	small	0.554297	medium	0.266714	small	-0.129427	small	-0.0115761	small
167	936.516	3	2528.34	-0.187855	small	-0.706993	medium	-0.571059	medium	-0.661485	medium	-0.924215	large	-0.62629	medium	-0.803827	large	-0.24643	small	-0.480298	small	-0.356784	small	-0.467351	small	-0.724453	medium	-0.423762	small	-0.602992	medium	-0.0511139	small	0.169325	small	-0.259109	small	0.0921326	small	-0.117141	small	0.449225	small	0.379588	small	-0.339848	small	0.123209	small
168	937.516	2	5754.85	-0.559571	medium	-0.756715	medium	-0.680376	medium	-0.832593	large	-0.833322	large	-0.812009	large	-0.923888	large	-0.293043	small	-0.147585	small	-0.09123	small	-0.287255	small	-0.250626	small	-0.257359	small	-0.356902	small	0.310092	small	0.20187	small	0.0563103	small	0.0259018	small	-0.06655	small	0.648677	medium	0.154955	small	0.0255783	small	-0.123328	small
169	939.132	3	2656.65	-0.634712	medium	-0.319537	small	-0.312714	small	-0.520687	medium	-0.28393	small	-0.477545	small	-0.534025	medium	0.0223233	small	0.307898	small	0.309074	small	0.130123	small	0.355226	small	0.142927	small	0.123769	small	0.650658	medium	0.179532	small	0.230752	small	0.016229	small	-0.0111303	small	0.541917	medium	-0.0415271	small	0.20281	small	-0.244692	small
170	939.536	5	314.292	-0.043897	small	-0.0725476	small	-0.0718023	small	-0.00371974	small	-0.0985751	small	-0.0684	small	-0.211716	small	0.0512282	small	-0.0286178	small	-0.0282608	small	0.0403565	small	-0.0545288	small	-0.0253344	small	-0.168791	small	0.0949804	small	-0.0680967	small	-0.0963167	small	-0.0642318	small	-0.212286	small	0.0546834	small	0.0249568	small	-0.0276422	small	-0.116091	small
171	940.486	2	6316.48	0.510302	medium	0.300298	small	0.301981	small	0.264733	small	0.401774	small	0.454922	small	0.22707	small	0.378938	small	-0.141979	small	-0.108373	small	-0.258848	small	-0.200194	small	0.0517686	small	-0.205812	small	-0.229867	small	0.119546	small	0.121212	small	0.23849	small	0.0259923	small	0.0927404	small	0.0501154	small	-0.21045	small	-0.0578637	small
172	941.508	3	1669.63	0.617764	medium	0.299627	small	0.305274	small	0.403907	small	0.315705	small	0.495514	small	0.258083	small	0.263578	small	-0.236616	small	-0.199314	small	-0.244146	small	-0.340072	small	-0.0019194	small	-0.286537	small	-0.374639	small	0.0195027	small	-0.0856653	small	0.184636	small	-0.0618155	small	-0.128661	small	0.0827931	small	-0.269585	small	0.00232559	small
173	942.092	3	2122.96	-0.353072	small	-0.096564	small	-0.0975909	small	-0.20237	small	-0.0562908	small	-0.186098	small	-0.268332	small	0.148457	small	0.26213	small	0.256854	small	0.154471	small	0.299354	small	0.155462	small	0.0982542	small	0.502547	medium	0.100094	small	0.147852	small	0.00601699	small	-0.0645951	small	0.363977	small	-0.0428639	small	0.13272	small	-0.213685	small
174	944.556	1	115022	0.833918	large	0.620035	medium	0.656599	medium	1.31562	very large	0.769816	medium	0.991247	large	0.859843	large	0.484747	small	0.00218175	small	-0.0602557	small	0.551702	medium	-0.0952008	small	0.050087	small	0.102767	small	-0.356325	small	-0.707341	medium	-0.647841	medium	-0.535295	medium	-0.433336	small	-0.85846	large	0.0318625	small	-0.154796	small	0.193484	small
175	944.598	1	17533.8	0.831201	large	0.615123	medium	0.655266	medium	1.31688	very large	0.757907	medium	0.981066	large	0.862612	large	0.477988	small	-0.00218764	small	-0.0681165	small	0.561678	medium	-0.103428	small	0.0409833	small	0.0965806	small	-0.362756	small	-0.734505	medium	-0.663862	medium	-0.553398	medium	-0.453471	small	-0.871789	large	0.0329047	small	-0.154488	small	0.195856	small
176	945.555	1	43847.6	0.884842	large	0.688497	medium	0.728184	medium	1.50115	very large	0.849885	large	1.09065	large	0.974481	large	0.542846	medium	0.0736811	small	0.0031805	small	0.702348	medium	0.0036214	small	0.104452	small	0.202373	small	-0.324947	small	-0.802754	large	-0.691042	medium	-0.644375	medium	-0.478918	small	-0.97022	large	-0.000359299	small	-0.0974359	small	0.195543	small
177	945.667	5	390.685	0.78214	medium	0.644999	medium	0.681973	medium	1.48687	very large	0.764428	medium	0.941496	large	0.959407	large	0.51105	medium	0.0890679	small	0.0213922	small	0.734324	medium	0.0077077	small	0.0886649	small	0.210429	small	-0.243534	small	-0.836504	large	-0.722995	medium	-0.68002	medium	-0.531362	medium	-0.939481	large	0.0135811	small	-0.0787552	small	0.200041	small
178	946.564	1	11600.2	0.916173	large	0.8003	large	0.825572	large	1.70245	very large	1.03079	large	1.17451	large	1.08549	large	0.686676	medium	0.167244	small	0.0829803	small	0.823406	large	0.183497	small	0.15567	small	0.280791	small	-0.193987	small	-0.835046	large	-0.634699	medium	-0.726362	medium	-0.513131	medium	-0.982687	large	-0.0988308	small	0.0476296	small	0.102184	small
179	947.535	4	983.053	0.785	medium	0.720818	medium	0.779255	medium	1.57753	very large	1.02612	large	0.936471	large	0.99998	large	0.693479	medium	0.0918263	small	-0.120383	small	0.298611	small	0.417107	small	-0.0993036	small	0.000264299	small	-0.223144	small	-0.541538	medium	0.18965	small	-0.533716	medium	-0.378267	small	-0.66014	medium	-0.649097	medium	0.519591	medium	-0.445178	small
180	948.524	4	645.606	0.631462	medium	0.673953	medium	0.624048	medium	0.996044	large	1.08201	large	0.717802	medium	0.683023	medium	0.594822	medium	0.152473	small	-0.0356892	small	0.190199	small	0.543749	medium	0.0219671	small	-0.0179372	small	-0.102736	small	-0.258023	small	0.37704	small	-0.188099	small	-0.238302	small	-0.34177	small	-0.699322	medium	0.543832	medium	-0.580449	medium
181	949.544	2	8414.73	-0.31421	small	0.121238	small	0.0251161	small	0.0396134	small	0.432045	small	-0.122541	small	-0.142734	small	0.334525	small	0.439711	small	0.341786	small	0.348989	small	0.72677	medium	0.1785	small	0.185404	small	0.645248	medium	-0.0134021	small	0.409177	small	-0.15737	small	-0.192742	small	0.314793	small	-0.400367	small	0.529893	medium	-0.593997	medium
182	950.516	4	879.676	0.46364	small	0.471366	small	0.412558	small	0.977856	large	0.638916	medium	0.588804	medium	0.478531	small	0.296891	small	0.103414	small	0.0402458	small	0.501818	medium	0.174448	small	0.167781	small	0.107163	small	-0.173911	small	-0.413862	small	-0.337741	small	-0.289944	small	-0.294008	small	-0.681557	medium	-0.108293	small	-0.0105469	small	-0.0325214	small
183	951.518	5	436.367	0.362794	small	0.507375	medium	0.450989	small	0.987133	large	0.628679	medium	0.593042	medium	0.501237	medium	0.363506	small	0.188837	small	0.129035	small	0.560116	medium	0.255307	small	0.237267	small	0.168427	small	-0.00953667	small	-0.390077	small	-0.298159	small	-0.281683	small	-0.317405	small	-0.594263	medium	-0.107918	small	0.00466407	small	-0.06051	small
184	952.039	2	7702.51	-0.54941	medium	-0.161194	small	-0.224731	small	-0.430516	small	0.11388	small	-0.362912	small	-0.447832	small	0.102153	small	0.395964	small	0.330358	small	0.145862	small	0.644992	medium	0.176958	small	0.142002	small	0.643619	medium	0.184821	small	0.543136	medium	0.0370617	small	-0.0126624	small	0.545936	medium	-0.332302	small	0.463697	small	-0.562988	medium
185	954.801	2	4507.75	-0.536956	medium	-0.297877	small	-0.29762	small	-0.453833	small	-0.255949	small	-0.424725	small	-0.527033	medium	0.0175492	small	0.247015	small	0.244126	small	0.102862	small	0.289754	small	0.107779	small	0.0499171	small	0.554417	medium	0.139744	small	0.193789	small	0.00663841	small	-0.063087	small	0.480047	small	-0.049576	small	0.177746	small	-0.262856	small
186	955.542	5	550.373	0.0718475	small	-0.215434	small	-0.196738	small	0.0264366	small	-0.344314	small	-0.161607	small	-0.242335	small	-0.17387	small	-0.297796	small	-0.278978	small	-0.0465704	small	-0.448372	small	-0.248336	small	-0.337741	small	-0.254435	small	-0.230507	small	-0.402948	small	-0.198925	small	-0.28999	small	-0.20317	small	0.150761	small	-0.192588	small	0.110815	small
187	956.722	2	6249.6	-0.519342	medium	-0.261442	small	-0.269313	small	-0.455137	small	-0.184965	small	-0.419002	small	-0.496695	small	0.070866	small	0.264696	small	0.256613	small	0.0811914	small	0.337544	small	0.100905	small	0.0611609	small	0.587802	medium	0.173528	small	0.26458	small	0.0197015	small	-0.0271749	small	0.536764	medium	-0.0891494	small	0.23664	small	-0.303529	small
188	957.548	5	580.106	0.473773	small	0.579758	medium	0.563412	medium	1.02486	large	0.661358	medium	0.713851	medium	0.646492	medium	0.490452	small	0.181364	small	0.145172	small	0.501638	medium	0.193864	small	0.24117	small	0.182881	small	0.031094	small	-0.353359	small	-0.300257	small	-0.252266	small	-0.303148	small	-0.456442	small	-0.0423885	small	-0.0465072	small	-0.00858772	small
189	958.567	3	3233.14	0.0895693	small	0.431667	small	0.408402	small	0.713917	medium	0.476407	small	0.472808	small	0.331769	small	0.472299	small	0.325991	small	0.296166	small	0.522883	medium	0.329546	small	0.334827	small	0.206447	small	0.325476	small	-0.296012	small	-0.268569	small	-0.208177	small	-0.361441	small	-0.275016	small	-0.0293982	small	-0.0356278	small	-0.122704	small
190	961.536	2	9112.1	0.151116	small	0.251825	small	0.257947	small	0.269753	small	0.250722	small	0.400188	small	0.105153	small	0.306491	small	0.109852	small	0.119852	small	0.10169	small	0.0772429	small	0.258819	small	-0.0471739	small	0.127822	small	0.0260618	small	-0.0375955	small	0.163921	small	-0.154572	small	0.0147794	small	0.0585037	small	-0.218226	small	-0.133245	small
191	963.504	5	529.142	0.122511	small	-0.236747	small	-0.258694	small	0.149806	small	-0.294219	small	-0.124002	small	-0.308309	small	-0.274158	small	-0.406525	small	-0.437984	small	0.0391119	small	-0.493226	small	-0.281211	small	-0.510159	medium	-0.463554	small	-0.485712	small	-0.538189	medium	-0.312087	small	-0.554387	medium	-0.502211	medium	0.0662245	small	-0.199299	small	-0.0211925	small
192	964.512	4	644.594	0.271501	small	0.259549	small	0.0843015	small	0.334226	small	0.686173	medium	0.190459	small	0.0337664	small	0.0318061	small	0.135255	small	-0.181477	small	0.0604254	small	0.553189	medium	-0.0674214	small	-0.236034	small	-0.243421	small	-0.241764	small	0.450466	small	-0.121603	small	-0.296703	small	-0.308199	small	-0.817216	large	0.566005	medium	-0.623203	medium
193	965.513	4	677.118	0.833812	large	0.661154	medium	0.692322	medium	0.865991	large	0.976842	large	0.82441	large	0.952957	large	0.555886	medium	0.0806073	small	-0.066883	small	-0.0836338	small	0.414322	small	0.0110036	small	0.103507	small	-0.334232	small	0.0170293	small	0.422024	small	0.0916233	small	0.188188	small	-0.271775	small	-0.547522	medium	0.39949	small	-0.342464	small
194	966.526	2	8838.99	-0.196085	small	0.217329	small	0.154182	small	-0.00664829	small	0.507312	medium	-0.00305564	small	0.0946553	small	0.389592	small	0.389306	small	0.329299	small	0.172395	small	0.622269	medium	0.172456	small	0.26341	small	0.530497	medium	0.154085	small	0.469651	small	0.0028602	small	0.0937014	small	0.37858	small	-0.331992	small	0.456607	small	-0.383925	small
195	969.353	2	7138.67	-0.421845	small	-0.115544	small	-0.130175	small	-0.297769	small	-0.00943324	small	-0.288374	small	-0.288657	small	0.172117	small	0.323112	small	0.302399	small	0.139939	small	0.409546	small	0.130304	small	0.162057	small	0.583235	medium	0.158786	small	0.29036	small	-0.00787948	small	0.0148434	small	0.489997	small	-0.121122	small	0.278156	small	-0.28139	small
196	970.545	5	301.276	0.258107	small	0.340908	small	0.296186	small	0.455166	small	0.45831	small	0.392865	small	0.211944	small	0.299093	small	0.0861564	small	0.0358461	small	0.175845	small	0.192188	small	0.129494	small	-0.0531342	small	0.0281886	small	-0.147257	small	0.018321	small	-0.0438908	small	-0.240692	small	-0.159272	small	-0.164456	small	0.0618893	small	-0.251834	small
197	970.928	2	8407.51	-0.489904	small	-0.727816	medium	-0.686874	medium	-1.0415	large	-0.760938	medium	-0.848337	large	-0.987973	large	-0.302553	small	-0.132957	small	-0.0939853	small	-0.338197	small	-0.123653	small	-0.22716	small	-0.299563	small	0.255556	small	0.339904	small	0.311075	small	0.148457	small	0.0942828	small	0.815424	large	0.042723	small	0.138627	small	-0.227098	small
198	974.503	1	11080.2	-0.39334	small	-0.502182	medium	-0.498517	small	-0.674995	medium	-0.489185	small	-0.639365	medium	-0.741536	medium	-0.186228	small	-0.0615335	small	-0.0550293	small	-0.171175	small	-0.026125	small	-0.177262	small	-0.223317	small	0.236071	small	0.149238	small	0.182853	small	-0.00363338	small	-0.0411761	small	0.503691	medium	-0.0301685	small	0.17737	small	-0.234268	small
199	975.52	4	770.75	0.558945	medium	0.594005	medium	0.563708	medium	0.914713	large	0.707437	medium	0.693013	medium	0.671507	medium	0.440511	small	0.089682	small	0.0353024	small	0.277382	small	0.17702	small	0.129606	small	0.102228	small	-0.118928	small	-0.240236	small	-0.07517	small	-0.140027	small	-0.173232	small	-0.409088	small	-0.149549	small	0.0540618	small	-0.0821477	small
200	976.497	3	1849.78	0.757758	medium	0.693277	medium	0.70718	medium	1.31496	very large	1.09516	large	1.02395	large	1.00665	large	0.537446	medium	0.289187	small	0.160884	small	0.775842	medium	0.586232	medium	0.266858	small	0.321817	small	-0.0266978	small	-0.744341	medium	-0.197203	small	-0.594351	medium	-0.525472	medium	-0.712014	medium	-0.480918	small	0.397477	small	-0.330612	small
201	978.493	2	9563.43	-0.306308	small	0.29531	small	0.190453	small	0.406503	small	0.54484	medium	0.0653457	small	0.0902442	small	0.389821	small	0.626874	medium	0.522696	medium	0.655907	medium	0.838797	large	0.369721	small	0.408944	small	0.691477	medium	-0.262514	small	0.0971841	small	-0.351614	small	-0.35928	small	-0.057473	small	-0.377642	small	0.49622	small	-0.505464	medium
202	980.516	2	7743	0.119682	small	0.177474	small	0.13445	small	0.840389	large	0.0914621	small	0.263003	small	0.0141182	small	0.126425	small	0.0496732	small	0.00247484	small	0.586499	medium	-0.031586	small	0.118846	small	-0.10535	small	-0.011506	small	-0.705181	medium	-0.675068	medium	-0.502607	medium	-0.816783	large	-0.742205	medium	0.0385899	small	-0.160296	small	-0.0776801	small
203	983.544	1	12240.6	-0.139013	small	0.158795	small	0.134503	small	0.247876	small	0.198944	small	0.11144	small	0.0166908	small	0.274266	small	0.296252	small	0.26844	small	0.348744	small	0.320044	small	0.231629	small	0.151959	small	0.390112	small	-0.108302	small	-0.0524288	small	-0.12057	small	-0.230264	small	0.0204613	small	-0.0586491	small	0.0762512	small	-0.182029	small
204	984.553	5	499.933	0.729135	medium	0.789232	medium	0.776244	medium	1.32274	very large	0.894836	large	1.00821	large	0.918998	large	0.645617	medium	0.155744	small	0.117334	small	0.460186	small	0.1669	small	0.273323	small	0.185969	small	-0.102139	small	-0.339588	small	-0.283157	small	-0.170987	small	-0.262663	small	-0.589332	medium	-0.0486792	small	-0.106847	small	0.0190511	small
205	985.569	3	2982.5	-0.235531	small	0.186392	small	0.161767	small	0.10188	small	0.286721	small	0.191895	small	-0.0111821	small	0.294109	small	0.430834	small	0.401624	small	0.317529	small	0.516418	medium	0.410557	small	0.229437	small	0.519272	medium	0.0561775	small	0.180425	small	0.0870679	small	-0.117264	small	0.187475	small	-0.120781	small	0.082805	small	-0.311437	small
206	986.568	5	473.279	0.532619	medium	0.657966	medium	0.623443	medium	1.07591	large	0.78587	medium	0.924232	large	0.621303	medium	0.472902	small	0.173681	small	0.120316	small	0.451543	small	0.233724	small	0.378973	small	0.0528196	small	-0.0762718	small	-0.34208	small	-0.219576	small	-0.057492	small	-0.428238	small	-0.556019	medium	-0.114649	small	-0.155159	small	-0.192047	small
207	987.648	2	6899.68	-0.378424	small	0.050062	small	0.0331917	small	-0.0541473	small	0.136065	small	-0.0372375	small	-0.127457	small	0.251069	small	0.452835	small	0.427925	small	0.315652	small	0.522935	medium	0.334716	small	0.268815	small	0.627953	medium	0.0893188	small	0.199563	small	0.0161256	small	-0.0732235	small	0.315852	small	-0.10298	small	0.174557	small	-0.280144	small
208	988.559	5	469.213	0.348086	small	0.592642	medium	0.562117	medium	0.932192	large	0.670205	medium	0.672675	medium	0.610915	medium	0.502975	medium	0.256889	small	0.217855	small	0.488372	small	0.288597	small	0.28968	small	0.239654	small	0.129165	small	-0.277276	small	-0.204727	small	-0.200386	small	-0.242457	small	-0.380863	small	-0.0712927	small	-0.0026441	small	-0.0439343	small
209	989.58	2	5383.09	-0.327968	small	0.135825	small	0.0923005	small	0.129036	small	0.261745	small	-0.022733	small	-0.0172233	small	0.306538	small	0.483567	small	0.432444	small	0.425711	small	0.582229	medium	0.294754	small	0.319863	small	0.620597	medium	-0.0403795	small	0.128814	small	-0.145726	small	-0.154797	small	0.174906	small	-0.167168	small	0.280398	small	-0.295922	small
210	990.558	5	470.841	0.356905	small	0.644383	medium	0.590236	medium	1.0024	large	0.9012	large	0.682855	medium	0.654384	medium	0.499471	small	0.314647	small	0.207911	small	0.553402	medium	0.53838	medium	0.271216	small	0.241729	small	0.0986583	small	-0.432102	small	0.0280764	small	-0.326489	small	-0.364531	small	-0.518436	medium	-0.433428	small	0.323999	small	-0.355829	small
211	991.552	5	429.077	0.353342	small	0.648353	medium	0.581566	medium	1.01252	large	0.853885	large	0.669121	medium	0.634749	medium	0.504739	medium	0.306154	small	0.213348	small	0.559768	medium	0.479224	small	0.271531	small	0.243918	small	0.118793	small	-0.388053	small	-0.0424377	small	-0.315046	small	-0.337551	small	-0.485002	small	-0.319804	small	0.242641	small	-0.265171	small
212	992.196	2	8549.81	-0.367593	small	0.0475884	small	0.0185039	small	-0.085589	small	0.178389	small	-0.102737	small	-0.110895	small	0.258996	small	0.440645	small	0.403088	small	0.280997	small	0.546279	medium	0.257949	small	0.276124	small	0.624139	medium	0.1064	small	0.280191	small	-0.0205329	small	-0.0242077	small	0.367803	small	-0.161055	small	0.281153	small	-0.307727	small
213	994.904	1	12088.8	-0.382916	small	-0.0987763	small	-0.0969382	small	-0.308749	small	-0.027676	small	-0.231502	small	-0.26662	small	0.195095	small	0.30043	small	0.295997	small	0.090623	small	0.360807	small	0.145582	small	0.138946	small	0.579459	medium	0.20849	small	0.290805	small	0.0601186	small	0.0485852	small	0.537167	medium	-0.0706122	small	0.208116	small	-0.245199	small
214	997.546	5	566.811	0.680767	medium	0.595983	medium	0.591125	medium	0.975378	large	0.610682	medium	0.772137	medium	0.634536	medium	0.507854	medium	-0.0383906	small	-0.0531039	small	0.211751	small	-0.0906831	small	0.077388	small	-0.0588422	small	-0.170107	small	-0.274082	small	-0.317134	small	-0.135202	small	-0.278095	small	-0.391636	small	0.0365676	small	-0.17178	small	0.0315332	small
215	998.545	3	2871.12	-0.240535	small	-0.0041811	small	-0.013182	small	-0.127704	small	0.0672056	small	-0.155096	small	-0.123949	small	0.233644	small	0.245365	small	0.232022	small	0.115111	small	0.304716	small	0.082806	small	0.127317	small	0.462762	small	0.113141	small	0.199675	small	-0.0319476	small	0.006434	small	0.375299	small	-0.0792275	small	0.220562	small	-0.196124	small
216	999.567	5	488.994	0.488925	small	0.636885	medium	0.597781	medium	1.08252	large	0.728415	medium	0.718459	medium	0.685157	medium	0.511065	medium	0.184012	small	0.135099	small	0.492155	small	0.221353	small	0.225769	small	0.179118	small	0.00690142	small	-0.351371	small	-0.26634	small	-0.241091	small	-0.309327	small	-0.506654	medium	-0.0844538	small	-0.0121067	small	-0.042348	small
217	1000.19	2	7739.06	-0.292536	small	0.0214963	small	0.0174619	small	-0.0914307	small	0.0741155	small	-0.04697	small	-0.134141	small	0.225697	small	0.327843	small	0.317429	small	0.197845	small	0.364824	small	0.230407	small	0.174286	small	0.509006	medium	0.108849	small	0.17081	small	0.0383115	small	-0.0407998	small	0.330688	small	-0.0556174	small	0.117661	small	-0.216405	small
218	1003.02	1	9707.91	-0.479054	small	-0.169882	small	-0.161577	small	-0.387809	small	-0.11893	small	-0.253055	small	-0.358553	small	0.108707	small	0.325536	small	0.32853	small	0.109987	small	0.366397	small	0.214692	small	0.150771	small	0.589239	medium	0.219042	small	0.271392	small	0.110892	small	0.0376641	small	0.519389	medium	-0.0455282	small	0.140405	small	-0.240015	small
219	1005.56	3	2609.11	-0.533729	medium	-0.344892	small	-0.314279	small	-0.629585	medium	-0.362145	small	-0.398565	small	-0.57449	medium	-0.014879	small	0.185196	small	0.215866	small	-0.0569317	small	0.178733	small	0.125091	small	-0.00833172	small	0.519178	medium	0.280606	small	0.247188	small	0.184653	small	0.0533564	small	0.621821	medium	0.0358744	small	0.0482734	small	-0.198593	small
220	1006.56	5	491.448	-0.0483554	small	0.125225	small	0.11958	small	0.143276	small	0.140941	small	0.124677	small	0.0252741	small	0.21029	small	0.169887	small	0.163472	small	0.180709	small	0.181437	small	0.163943	small	0.0712255	small	0.248758	small	-0.0188155	small	-0.000537036	small	-0.0123472	small	-0.114001	small	0.0650269	small	-0.0183051	small	0.0120216	small	-0.113082	small
221	1007.57	5	454.347	0.70847	medium	0.688572	medium	0.640658	medium	1.14525	large	0.896001	large	0.859129	large	0.689671	medium	0.508531	medium	0.0425608	small	-0.0558259	small	0.343268	small	0.189524	small	0.140915	small	-0.0653451	small	-0.249016	small	-0.437686	small	-0.149292	small	-0.200333	small	-0.437656	small	-0.64558	medium	-0.260278	small	0.0498034	small	-0.263333	small
222	1008.57	5	333.094	0.403583	small	0.545871	medium	0.503141	medium	0.823542	large	0.653406	medium	0.593163	medium	0.540927	medium	0.434369	small	0.151052	small	0.0976804	small	0.356961	small	0.225173	small	0.175088	small	0.113623	small	0.00297608	small	-0.279273	small	-0.138023	small	-0.179379	small	-0.257739	small	-0.389629	small	-0.135216	small	0.0463146	small	-0.116922	small
223	1010.43	2	4331.51	-0.526752	medium	-0.208347	small	-0.214494	small	-0.42053	small	-0.120095	small	-0.356506	small	-0.395928	small	0.0848828	small	0.328936	small	0.318454	small	0.124496	small	0.408896	small	0.161314	small	0.158064	small	0.615382	medium	0.193935	small	0.299061	small	0.0409804	small	0.0301523	small	0.526407	medium	-0.0971986	small	0.239999	small	-0.274035	small
224	1010.56	5	252.721	0.13804	small	0.21599	small	0.179369	small	0.382837	small	0.272746	small	0.215315	small	0.122561	small	0.206251	small	0.0818383	small	0.044603	small	0.239856	small	0.134917	small	0.0809064	small	-0.0154592	small	0.0673015	small	-0.189778	small	-0.099996	small	-0.145842	small	-0.255751	small	-0.172931	small	-0.089095	small	0.0497659	small	-0.150224	small
225	1011.57	5	416.544	0.126535	small	0.175711	small	0.172821	small	0.272832	small	0.152541	small	0.209365	small	0.140375	small	0.223929	small	0.0710531	small	0.0745465	small	0.178912	small	0.0318812	small	0.105547	small	0.0532828	small	0.108153	small	-0.0487357	small	-0.139356	small	-0.0402069	small	-0.0489684	small	-0.0783463	small	0.0510646	small	-0.0765939	small	0.0329673	small
226	1012.51	1	11332.5	-0.448563	small	-0.1145	small	-0.118904	small	-0.315559	small	-0.0278524	small	-0.234003	small	-0.264839	small	0.132197	small	0.35312	small	0.34101	small	0.145761	small	0.429035	small	0.205053	small	0.203151	small	0.586437	medium	0.193243	small	0.300035	small	0.0646681	small	0.055263	small	0.4755	small	-0.0931348	small	0.211776	small	-0.244632	small
227	1014.56	5	561.206	0.729286	medium	0.603996	medium	0.612105	medium	0.928103	large	0.627384	medium	0.821587	large	0.744662	medium	0.450477	small	-0.0522376	small	-0.0565322	small	0.134868	small	-0.111658	small	0.0899747	small	0.0170091	small	-0.275459	small	-0.194334	small	-0.251743	small	-0.0447588	small	-0.117058	small	-0.419064	small	0.0526056	small	-0.202783	small	0.128514	small
228	1015.57	5	528.4	0.538735	medium	0.579113	medium	0.558099	medium	0.898416	large	0.635789	medium	0.679663	medium	0.662794	medium	0.442298	small	0.0681427	small	0.0398943	small	0.280304	small	0.0705086	small	0.127421	small	0.106723	small	-0.110754	small	-0.248445	small	-0.222312	small	-0.150834	small	-0.175867	small	-0.413945	small	-0.0301738	small	-0.0616027	small	0.0393372	small
229	1016.64	2	9165.29	-0.417567	small	-0.132963	small	-0.140256	small	-0.311018	small	-0.046746	small	-0.285451	small	-0.276883	small	0.128638	small	0.300694	small	0.287402	small	0.11802	small	0.378973	small	0.1248	small	0.165167	small	0.550113	medium	0.167606	small	0.274556	small	0.00982143	small	0.0435326	small	0.462963	small	-0.0960477	small	0.245374	small	-0.23694	small
230	1017.56	5	625.215	0.0861547	small	0.326421	small	0.273145	small	0.419772	small	0.458537	small	0.249941	small	0.253076	small	0.320196	small	0.232761	small	0.178799	small	0.304741	small	0.348332	small	0.152903	small	0.154103	small	0.216553	small	-0.14518	small	0.0316878	small	-0.15674	small	-0.166377	small	-0.109654	small	-0.178744	small	0.193768	small	-0.20252	small
231	1018.54	2	6718.41	-0.0157524	small	-0.291918	small	-0.230145	small	-0.225131	small	-0.421034	small	-0.275039	small	-0.331231	small	-0.0610478	small	-0.291411	small	-0.228803	small	-0.244241	small	-0.470727	small	-0.292162	small	-0.36071	small	-0.0503031	small	0.0220692	small	-0.223636	small	-0.0489957	small	-0.111468	small	0.193132	small	0.218585	small	-0.153677	small	0.100608	small
232	1020.84	2	5000.42	-0.445811	small	-0.169639	small	-0.167973	small	-0.172821	small	-0.172184	small	-0.299283	small	-0.310948	small	0.089008	small	0.289456	small	0.284937	small	0.277785	small	0.280924	small	0.137339	small	0.15808	small	0.539234	medium	-5.02697e-05	small	-0.00127227	small	-0.134274	small	-0.141405	small	0.274563	small	0.0011787	small	0.135258	small	-0.136351	small
233	1021.57	5	444.445	0.573926	medium	0.464955	small	0.464527	small	0.870721	large	0.432607	small	0.668981	medium	0.494525	small	0.370463	small	-0.0283634	small	-0.0185011	small	0.221834	small	-0.158519	small	0.179551	small	-0.0715802	small	-0.196707	small	-0.218301	small	-0.404642	small	-0.00559837	small	-0.293398	small	-0.431204	small	0.119569	small	-0.316873	small	0.0827382	small
234	1022.55	3	2979.87	-0.12794	small	0.116854	small	0.121843	small	-0.0201764	small	0.148614	small	0.153249	small	-0.0119612	small	0.222587	small	0.245228	small	0.245358	small	0.107135	small	0.271086	small	0.259466	small	0.117523	small	0.342405	small	0.141278	small	0.176051	small	0.164628	small	0.00848869	small	0.255402	small	-0.0195481	small	-0.0207555	small	-0.164698	small
235	1025.6	1	17073.1	-0.356381	small	0.0197636	small	0.00968992	small	-0.0881826	small	0.0882276	small	-0.0371429	small	-0.139399	small	0.195347	small	0.397385	small	0.379306	small	0.262085	small	0.445604	small	0.30368	small	0.23651	small	0.545401	medium	0.0989895	small	0.18391	small	0.0462892	small	-0.0494982	small	0.294874	small	-0.0781119	small	0.122869	small	-0.239303	small
236	1026.6	4	704.638	0.491404	small	0.507659	medium	0.502237	medium	0.837661	large	0.427693	small	0.751841	medium	0.511518	medium	0.277533	small	0.00755025	small	0.0012137	small	0.318562	small	-0.0969761	small	0.256195	small	-0.0193305	small	-0.237269	small	-0.341058	small	-0.455506	small	-0.0594712	small	-0.378452	small	-0.594505	medium	0.0992816	small	-0.371398	small	0.0856928	small
237	1027.59	4	1287.09	-0.235671	small	0.0236351	small	0.0189112	small	-0.0279567	small	0.0554715	small	0.0524735	small	-0.133264	small	0.128561	small	0.271296	small	0.262524	small	0.202282	small	0.293238	small	0.277103	small	0.115627	small	0.361985	small	0.0475051	small	0.0860627	small	0.0785738	small	-0.107149	small	0.160616	small	-0.0365084	small	0.000270559	small	-0.196918	small
238	1028.6	3	2239.23	-0.231485	small	0.0946913	small	0.10475	small	0.0323191	small	0.0864547	small	0.102886	small	-0.0118466	small	0.214121	small	0.337594	small	0.343301	small	0.252099	small	0.315293	small	0.321345	small	0.224666	small	0.437118	small	0.0722643	small	0.0543707	small	0.0704031	small	-0.0461167	small	0.185275	small	0.0184969	small	-0.0198218	small	-0.102102	small
239	1029.52	2	5186.9	-0.225219	small	0.0401801	small	0.0371068	small	-0.00722849	small	0.0650143	small	-0.0257662	small	-0.0735275	small	0.201965	small	0.277346	small	0.269949	small	0.212862	small	0.294675	small	0.193391	small	0.160839	small	0.426378	small	0.0447994	small	0.0747346	small	-0.0184725	small	-0.0679649	small	0.216515	small	-0.0275356	small	0.0903954	small	-0.145499	small
240	1032.47	1	10207.6	0.759755	medium	0.573221	medium	0.594865	medium	1.25847	very large	0.870163	large	0.881997	large	0.709233	medium	0.526937	medium	0.0109788	small	-0.0924983	small	0.585408	medium	-0.0105176	small	0.0270442	small	-0.00912447	small	-0.301917	small	-0.82522	large	-0.636034	medium	-0.583221	medium	-0.574782	medium	-0.850845	large	-0.0866976	small	-0.0414515	small	0.000110974	small
241	1032.62	1	11830.4	1.07639	large	0.629223	medium	0.691394	medium	1.42359	very large	0.921052	large	1.14761	large	0.929062	large	0.522683	medium	-0.0544803	small	-0.167241	small	0.608414	medium	-0.140581	small	-0.00563836	small	-0.00738097	small	-0.520998	medium	-0.890458	large	-0.71551	medium	-0.616321	medium	-0.579368	medium	-0.980653	large	-0.0301269	small	-0.13959	small	0.121275	small
242	1033.62	2	5375.65	1.14615	large	0.685542	medium	0.740424	medium	1.43787	very large	1.03834	large	1.20239	very large	0.989543	large	0.574554	medium	-0.0763032	small	-0.203073	small	0.538267	medium	-0.0914026	small	-0.0276687	small	-0.0483147	small	-0.555596	medium	-0.836826	large	-0.611174	medium	-0.564208	medium	-0.550805	medium	-0.954024	large	-0.110905	small	-0.0668016	small	0.0377367	small
243	1033.77	5	413.757	0.945797	large	0.61135	medium	0.649178	medium	1.30729	very large	0.895085	large	0.97247	large	0.847737	large	0.491982	small	-0.0564137	small	-0.175238	small	0.543549	medium	-0.0842584	small	-0.0226159	small	-0.0477797	small	-0.467202	small	-0.831454	large	-0.621632	medium	-0.563368	medium	-0.564193	medium	-0.90101	large	-0.0925731	small	-0.0633636	small	0.0320264	small
244	1034.62	2	8106.5	0.385021	small	0.537474	medium	0.460509	small	1.0308	large	0.819132	large	0.530053	medium	0.512546	medium	0.439975	small	0.169279	small	0.0644459	small	0.538237	medium	0.321236	small	0.10021	small	0.097202	small	-0.0117206	small	-0.583183	medium	-0.308188	small	-0.472718	small	-0.46284	small	-0.636279	medium	-0.27405	small	0.227626	small	-0.222202	small
245	1036.44	2	5604.42	-0.40752	small	-0.00725012	small	-0.0122262	small	-0.135675	small	0.0541378	small	-0.127219	small	-0.131635	small	0.212	small	0.426453	small	0.412315	small	0.276809	small	0.473617	small	0.272257	small	0.297414	small	0.627019	medium	0.126297	small	0.203135	small	0.00279057	small	0.00797719	small	0.372128	small	-0.0672377	small	0.185196	small	-0.197087	small
246	1039.57	2	5252.64	-0.0840552	small	0.233118	small	0.23965	small	0.200873	small	0.22676	small	0.311337	small	0.0948808	small	0.315972	small	0.312821	small	0.315342	small	0.261289	small	0.297559	small	0.368165	small	0.171573	small	0.380831	small	0.0386853	small	0.0168718	small	0.11107	small	-0.107075	small	0.105866	small	0.0233731	small	-0.103826	small	-0.130018	small
247	1039.63	2	5154.44	-0.140069	small	0.196492	small	0.173038	small	0.19131	small	0.277957	small	0.186323	small	0.0577538	small	0.279679	small	0.330677	small	0.305058	small	0.299891	small	0.398326	small	0.30196	small	0.190003	small	0.401312	small	-0.019852	small	0.0719372	small	-0.00154543	small	-0.130931	small	0.0721294	small	-0.0931151	small	0.0720594	small	-0.21573	small
248	1042.21	2	7693.87	-0.461364	small	-0.135633	small	-0.142487	small	-0.235606	small	-0.0748287	small	-0.238773	small	-0.302635	small	0.0999698	small	0.352813	small	0.337483	small	0.233465	small	0.402601	small	0.218747	small	0.187688	small	0.570696	medium	0.0945222	small	0.172182	small	-0.0115499	small	-0.0634967	small	0.356026	small	-0.0705391	small	0.17363	small	-0.23849	small
249	1043.57	4	756.253	0.861368	large	0.81705	large	0.804622	large	1.62901	very large	0.987965	large	1.10929	large	1.06758	large	0.633366	medium	0.105789	small	0.0574575	small	0.518662	medium	0.0975081	small	0.188092	small	0.218287	small	-0.240438	small	-0.472862	small	-0.431162	small	-0.339715	small	-0.276869	small	-0.803036	large	-0.0381345	small	-0.091808	small	0.127982	small
250	1046.59	1	12807.7	-0.038635	small	0.262767	small	0.225215	small	0.463379	small	0.324883	small	0.295636	small	0.0925363	small	0.3027	small	0.288722	small	0.248974	small	0.429265	small	0.326789	small	0.296974	small	0.119951	small	0.307846	small	-0.202542	small	-0.129637	small	-0.0975555	small	-0.368634	small	-0.177098	small	-0.0796945	small	-0.00964825	small	-0.232776	small
251	1048.54	2	7187.34	0.0523628	small	0.0888021	small	0.081908	small	0.177297	small	0.0924903	small	0.308708	small	-0.214659	small	0.116826	small	0.0362283	small	0.0298422	small	0.0958124	small	0.0306419	small	0.230012	small	-0.232832	small	0.0485512	small	-0.0655952	small	-0.0747534	small	0.144688	small	-0.372761	small	-0.0625011	small	0.000900034	small	-0.217823	small	-0.289627	small
252	1049.54	2	6032.84	-0.540759	medium	-0.390332	small	-0.373692	small	-0.579823	medium	-0.399271	small	-0.441385	small	-0.607532	medium	-0.117509	small	0.153072	small	0.172483	small	-0.00912808	small	0.150652	small	0.0930148	small	-0.0246185	small	0.432736	small	0.185921	small	0.165922	small	0.103685	small	-0.0157982	small	0.471606	small	0.0184932	small	0.0540068	small	-0.188165	small
253	1051.44	2	6159.66	-0.447607	small	-0.236192	small	-0.272598	small	-0.501847	medium	-0.0443477	small	-0.375263	small	-0.467625	small	0.000112092	small	0.224293	small	0.188829	small	-0.0261459	small	0.403248	small	0.0730391	small	0.0165652	small	0.457065	small	0.223089	small	0.458653	small	0.102027	small	0.0476124	small	0.526635	medium	-0.229203	small	0.331492	small	-0.42499	small
254	1053.52	3	3960.41	-0.339368	small	-0.0386718	small	-0.0812817	small	-0.116061	small	0.111916	small	-0.169802	small	-0.246977	small	0.162147	small	0.316364	small	0.272939	small	0.220516	small	0.461084	small	0.168462	small	0.110245	small	0.517972	medium	0.0394239	small	0.236222	small	-0.0534684	small	-0.128564	small	0.293407	small	-0.197644	small	0.28746	small	-0.377505	small
255	1057.6	2	6740.96	-0.328602	small	-0.127834	small	-0.129359	small	-0.233736	small	-0.0785023	small	-0.153233	small	-0.326712	small	0.086453	small	0.217816	small	0.212698	small	0.0976666	small	0.265879	small	0.169076	small	0.0165154	small	0.44119	small	0.112915	small	0.170122	small	0.0741683	small	-0.0885277	small	0.354972	small	-0.0528416	small	0.0829441	small	-0.263892	small
256	1059.6	1	17579.7	-0.169062	small	-0.232823	small	-0.210782	small	-0.432077	small	-0.233795	small	-0.205909	small	-0.441573	small	-0.00551138	small	-0.052129	small	-0.0314008	small	-0.214831	small	-0.0439719	small	-0.0308899	small	-0.232238	small	0.16726	small	0.204787	small	0.199821	small	0.186973	small	-0.00912222	small	0.450149	small	0.0136047	small	-0.0107961	small	-0.209476	small
257	1060.6	4	821.749	0.924775	large	0.402271	small	0.381373	small	0.860715	large	0.499209	small	0.641528	medium	0.374012	small	0.32867	small	-0.329217	small	-0.295692	small	-0.206334	small	-0.485901	small	-0.103744	small	-0.289435	small	-0.601027	medium	-0.125502	small	-0.316916	small	0.062262	small	-0.126236	small	-0.454891	small	0.0729385	small	-0.286506	small	0.0576571	small
258	1061.6	4	810.885	0.707415	medium	0.285249	small	0.270581	small	0.648862	medium	0.264039	small	0.468731	small	0.267635	small	0.149288	small	-0.330992	small	-0.323931	small	-0.09029	small	-0.441196	small	-0.153267	small	-0.327629	small	-0.531398	medium	-0.237535	small	-0.361657	small	-0.0688018	small	-0.237905	small	-0.454598	small	0.0588971	small	-0.235007	small	0.0465691	small
259	1062.86	2	7828.9	-0.347614	small	-0.146273	small	-0.163094	small	-0.299687	small	-0.0412939	small	-0.238072	small	-0.344151	small	0.0778634	small	0.206875	small	0.183063	small	0.0653343	small	0.311154	small	0.0981453	small	0.016233	small	0.42918	small	0.120759	small	0.265813	small	0.0376803	small	-0.0524244	small	0.398212	small	-0.124578	small	0.200946	small	-0.308359	small
260	1063.6	5	608.676	0.0894642	small	0.143106	small	0.10113	small	0.291623	small	0.1892	small	0.160285	small	0.0265222	small	0.104537	small	0.0495152	small	0.00771016	small	0.223884	small	0.105265	small	0.0769007	small	-0.0706711	small	0.0145801	small	-0.220896	small	-0.127265	small	-0.142187	small	-0.308714	small	-0.216248	small	-0.097876	small	0.024282	small	-0.18245	small
261	1064.6	3	2264.74	-0.426996	small	-0.0125116	small	-0.0435054	small	-0.15202	small	0.127982	small	-0.205627	small	-0.128527	small	0.191672	small	0.423422	small	0.386991	small	0.276278	small	0.553683	medium	0.211859	small	0.308447	small	0.618081	medium	0.106109	small	0.28679	small	-0.0589002	small	0.0254731	small	0.354889	small	-0.169701	small	0.330839	small	-0.262154	small
262	1065.59	5	478.959	0.185592	small	0.481885	small	0.442081	small	0.613621	medium	0.608616	medium	0.452581	small	0.479454	small	0.410077	small	0.311761	small	0.262259	small	0.433247	small	0.440256	small	0.272071	small	0.300234	small	0.226011	small	-0.162447	small	0.0608997	small	-0.152485	small	-0.119935	small	-0.211938	small	-0.219964	small	0.198292	small	-0.170157	small
263	1066.6	1	9627.36	-0.505633	medium	-0.0188126	small	-0.0465421	small	-0.21405	small	0.127512	small	-0.162353	small	-0.174421	small	0.190866	small	0.499603	small	0.4704	small	0.297886	small	0.618517	medium	0.324797	small	0.346742	small	0.707713	medium	0.16606	small	0.34056	small	0.0392062	small	0.042664	small	0.434476	small	-0.174209	small	0.280936	small	-0.303623	small
264	1067.6	5	493.032	0.355124	small	0.524072	medium	0.521706	medium	0.922842	large	0.587439	medium	0.694458	medium	0.563133	medium	0.423215	small	0.233023	small	0.194889	small	0.515338	medium	0.288484	small	0.330159	small	0.207864	small	0.0682903	small	-0.310079	small	-0.124548	small	-0.174007	small	-0.290547	small	-0.442953	small	-0.134408	small	0.0159522	small	-0.11467	small
265	1068.6	3	2385.21	-0.415294	small	-0.00518792	small	-0.0240825	small	-0.115729	small	0.0891814	small	-0.0905916	small	-0.157877	small	0.167559	small	0.437916	small	0.411453	small	0.302991	small	0.513432	medium	0.318209	small	0.27756	small	0.594118	medium	0.0947335	small	0.217417	small	0.0214659	small	-0.0420573	small	0.304605	small	-0.11548	small	0.182006	small	-0.260171	small
266	1069.61	5	387.604	0.255277	small	0.404177	small	0.378003	small	0.58222	medium	0.447203	small	0.525383	medium	0.34508	small	0.301316	small	0.150476	small	0.123538	small	0.289492	small	0.174987	small	0.258763	small	0.0781479	small	0.0348408	small	-0.167111	small	-0.120566	small	-0.0188664	small	-0.220535	small	-0.269997	small	-0.0499684	small	-0.095022	small	-0.0994883	small
267	1070.86	1	11185.3	-0.406555	small	0.0982264	small	0.0763323	small	0.124309	small	0.146465	small	-0.0549663	small	0.0242898	small	0.253265	small	0.536588	medium	0.506305	medium	0.505508	medium	0.561597	medium	0.34271	small	0.442774	small	0.668564	medium	-0.0536118	small	0.0166845	small	-0.174444	small	-0.108697	small	0.127088	small	-0.071283	small	0.20231	small	-0.130036	small
268	1071.6	5	504.409	0.592385	medium	0.73305	medium	0.714908	medium	1.39044	very large	0.799304	medium	0.901974	large	0.881684	large	0.572421	medium	0.2135	small	0.170193	small	0.64477	medium	0.200438	small	0.313824	small	0.2466	small	-0.0441223	small	-0.476102	small	-0.429147	small	-0.286408	small	-0.411121	small	-0.730469	medium	-0.0303842	small	-0.119946	small	0.0376207	small
269	1072.6	5	470.71	0.624332	medium	0.709168	medium	0.683033	medium	1.30744	very large	0.790835	medium	0.89802	large	0.79696	medium	0.52774	medium	0.145536	small	0.0925057	small	0.550283	medium	0.155324	small	0.262272	small	0.138243	small	-0.124054	small	-0.478952	small	-0.392327	small	-0.270667	small	-0.428108	small	-0.724722	medium	-0.0656149	small	-0.110178	small	-0.0214479	small
270	1075.62	1	68051.2	0.0168698	small	-0.803195	large	-0.689094	medium	-0.614722	medium	-0.705698	medium	-0.634161	medium	-0.716315	medium	-0.417663	small	-0.780068	medium	-0.661413	medium	-0.536388	medium	-0.639624	medium	-0.575262	medium	-0.647216	medium	-0.38831	small	0.154657	small	0.00720967	small	0.082938	small	-0.0481709	small	0.351225	small	0.158028	small	-0.0844103	small	-0.0574109	small
271	1075.69	5	201.114	0.110499	small	-0.681206	medium	-0.585398	medium	-0.508931	medium	-0.622981	medium	-0.531733	medium	-0.634754	medium	-0.353585	small	-0.761321	medium	-0.648987	medium	-0.483196	small	-0.608912	medium	-0.535467	medium	-0.614774	medium	-0.400414	small	0.0898452	small	-0.0767224	small	0.0401702	small	-0.121028	small	0.26223	small	0.151714	small	-0.109895	small	-0.0516063	small
272	1076.62	1	25924.5	0.0426749	small	-0.758781	medium	-0.661871	medium	-0.578791	medium	-0.666969	medium	-0.609576	medium	-0.701876	medium	-0.400425	small	-0.771807	medium	-0.665588	medium	-0.522966	medium	-0.626647	medium	-0.574432	medium	-0.654233	medium	-0.396574	small	0.113111	small	-0.0140163	small	0.0483272	small	-0.102709	small	0.307303	small	0.128597	small	-0.063495	small	-0.088875	small
273	1077.62	3	2741.03	0.111762	small	-0.573691	medium	-0.526738	medium	-0.414612	small	-0.542447	medium	-0.462787	small	-0.614475	medium	-0.341836	small	-0.719844	medium	-0.658387	medium	-0.488358	small	-0.6372	medium	-0.558002	medium	-0.704662	medium	-0.44178	small	-0.0270663	small	-0.123576	small	-0.020752	small	-0.237656	small	0.113603	small	0.0879004	small	-0.10011	small	-0.101213	small
274	1078.21	3	2122.66	-0.0866053	small	-0.708757	medium	-0.66468	medium	-0.668354	medium	-0.649254	medium	-0.672652	medium	-0.863778	large	-0.342548	small	-0.567693	medium	-0.523523	medium	-0.499868	small	-0.494284	small	-0.516405	medium	-0.686051	medium	-0.218336	small	0.118038	small	0.0947981	small	0.0385172	small	-0.17667	small	0.428761	small	0.029819	small	0.0525553	small	-0.273724	small
275	1078.6	3	1934.15	0.275193	small	0.0498934	small	0.0171369	small	0.267465	small	0.0705972	small	0.100029	small	-0.0802658	small	0.0290278	small	-0.206134	small	-0.247203	small	0.00269058	small	-0.185488	small	-0.160211	small	-0.351499	small	-0.237341	small	-0.243548	small	-0.175312	small	-0.151575	small	-0.3366	small	-0.22653	small	-0.0526706	small	-0.0262621	small	-0.143525	small
276	1079.6	1	10551.9	-0.334843	small	-0.109667	small	-0.141784	small	-0.22696	small	0.0180056	small	-0.240752	small	-0.291317	small	0.0845981	small	0.2148	small	0.18278	small	0.111984	small	0.335907	small	0.0788797	small	0.0539993	small	0.408302	small	0.0703221	small	0.230231	small	-0.0282244	small	-0.0634877	small	0.30714	small	-0.155175	small	0.245157	small	-0.295719	small
277	1081.61	4	820.199	0.343757	small	0.277435	small	0.249233	small	0.348377	small	0.359606	small	0.356674	small	0.173175	small	0.237219	small	-0.0748509	small	-0.104736	small	-0.0205101	small	-0.00711561	small	-0.000619095	small	-0.178175	small	-0.1251	small	-0.0854004	small	0.0151063	small	0.0209655	small	-0.168632	small	-0.111524	small	-0.101076	small	-0.00672915	small	-0.184269	small
278	1083.47	2	6267.32	-0.258595	small	0.0475518	small	0.081269	small	-0.175075	small	0.0293872	small	-0.0866192	small	0.0896794	small	0.241255	small	0.310447	small	0.338604	small	0.0910164	small	0.283991	small	0.161636	small	0.341111	small	0.485942	small	0.251853	small	0.205367	small	0.0762227	small	0.268869	small	0.428301	small	0.0524832	small	0.113752	small	0.0603518	small
279	1085.63	3	3463.83	-0.151343	small	0.277575	small	0.267163	small	0.385715	small	0.268538	small	0.199079	small	0.257693	small	0.340729	small	0.428509	small	0.414836	small	0.492892	small	0.40808	small	0.330321	small	0.395706	small	0.476369	small	-0.133699	small	-0.140564	small	-0.173541	small	-0.146974	small	-0.070701	small	0.00465538	small	0.0529216	small	-0.00906977	small
280	1088.6	2	8685.03	-0.102907	small	0.37844	small	0.331066	small	0.634287	medium	0.433083	small	0.267325	small	0.371205	small	0.360491	small	0.475347	small	0.426485	small	0.685096	medium	0.516578	medium	0.348588	small	0.458111	small	0.448973	small	-0.313329	small	-0.225137	small	-0.324376	small	-0.292248	small	-0.305332	small	-0.0934254	small	0.135444	small	-0.0672786	small
281	1089.6	4	957.285	0.70671	medium	0.601083	medium	0.588306	medium	1.04071	large	0.683542	medium	0.814071	large	0.684771	medium	0.446289	small	0.0177851	small	-0.0194005	small	0.278241	small	0.0343256	small	0.183578	small	-0.00776777	small	-0.256761	small	-0.283535	small	-0.220109	small	-0.0654453	small	-0.278825	small	-0.542417	medium	-0.0520045	small	-0.142436	small	-0.0409652	small
282	1090.61	2	4570.95	0.0742974	small	0.361281	small	0.31378	small	0.581046	medium	0.413598	small	0.305339	small	0.271398	small	0.355097	small	0.280678	small	0.23278	small	0.484953	small	0.327309	small	0.223989	small	0.188769	small	0.269248	small	-0.291608	small	-0.195737	small	-0.260222	small	-0.330155	small	-0.271705	small	-0.0996362	small	0.0882333	small	-0.144397	small
283	1093.58	2	5312.75	0.299158	small	0.427269	small	0.435837	small	0.761538	medium	0.35724	small	0.560472	medium	0.450622	small	0.364762	small	0.13158	small	0.13197	small	0.363978	small	0.0428349	small	0.246183	small	0.113583	small	0.022516	small	-0.248887	small	-0.336538	small	-0.0908211	small	-0.280306	small	-0.410705	small	0.0898609	small	-0.213042	small	0.0717813	small
284	1093.68	5	364.194	0.692904	medium	0.571794	medium	0.601856	medium	1.24336	very large	0.49966	small	0.834865	large	0.771546	medium	0.436675	small	-0.0240857	small	-0.0274624	small	0.357877	small	-0.15922	small	0.177203	small	0.0183906	small	-0.315126	small	-0.406264	small	-0.518879	medium	-0.150686	small	-0.365907	small	-0.770919	medium	0.135202	small	-0.324478	small	0.186396	small
285	1095.62	1	15923.4	0.339615	small	0.310975	small	0.287215	small	0.59629	medium	0.268842	small	0.512815	medium	0.269872	small	0.0587991	small	-0.0219642	small	-0.0407376	small	0.300494	small	-0.100238	small	0.218672	small	-0.0535189	small	-0.360921	small	-0.333812	small	-0.424453	small	-0.0575129	small	-0.323211	small	-0.707159	medium	0.0466691	small	-0.316651	small	0.0347823	small
286	1096.62	1	14025.5	0.0976918	small	0.177538	small	0.127192	small	0.666441	medium	0.182339	small	0.277918	small	0.0535394	small	0.0561444	small	0.0968375	small	0.0303041	small	0.556198	medium	0.0784472	small	0.179256	small	-0.0396469	small	-0.0498224	small	-0.688518	medium	-0.533715	medium	-0.432201	small	-0.564884	medium	-0.61606	medium	-0.0446581	small	-0.114966	small	-0.116953	small
287	1098.66	3	2969.33	-0.44735	small	-0.132887	small	-0.29964	small	0.410736	small	-0.163104	small	-0.357322	small	-0.500378	medium	-0.0463922	small	0.215917	small	0.169374	small	0.611103	medium	0.311295	small	0.0926226	small	-0.034201	small	0.429362	small	-0.719612	medium	-0.474831	small	-0.556799	medium	-0.635513	medium	-0.414692	small	-0.141791	small	0.215116	small	-0.366581	small
288	1100.43	2	5876.72	-0.398572	small	-0.0570196	small	-0.0810237	small	0.011213	small	-0.0106724	small	-0.089172	small	-0.295282	small	0.127425	small	0.355845	small	0.325624	small	0.39933	small	0.394635	small	0.297807	small	0.122547	small	0.528703	medium	-0.0923171	small	-0.0225599	small	-0.0984108	small	-0.313113	small	0.119183	small	-0.0714643	small	0.0805335	small	-0.29302	small
289	1101.55	2	6070.78	-0.263901	small	0.0778113	small	0.048557	small	0.0503654	small	0.169673	small	0.116711	small	-0.139976	small	0.159222	small	0.354228	small	0.318468	small	0.306998	small	0.430899	small	0.36153	small	0.137879	small	0.42094	small	-0.00119874	small	0.124994	small	0.0689799	small	-0.201213	small	0.11398	small	-0.119487	small	0.0434431	small	-0.32383	small
290	1103.33	3	3441.41	-0.0418389	small	0.0941974	small	0.0651881	small	0.389687	small	0.0794687	small	0.00830036	small	0.0523647	small	0.135992	small	0.132824	small	0.104289	small	0.407146	small	0.116896	small	0.0466381	small	0.0914032	small	0.172745	small	-0.312083	small	-0.296107	small	-0.340844	small	-0.328632	small	-0.25596	small	-0.0127019	small	0.0656286	small	-0.0273227	small
291	1104.61	1	18595.8	0.189717	small	-0.325246	small	-0.283636	small	-0.0038866	small	-0.498816	small	-0.29534	small	-0.224336	small	-0.25643	small	-0.552883	medium	-0.492946	small	-0.178045	small	-0.621806	medium	-0.444157	small	-0.388495	small	-0.415584	small	-0.306285	small	-0.625111	medium	-0.330206	small	-0.252623	small	-0.283484	small	0.274002	small	-0.241693	small	0.35865	small
292	1105.61	1	92372.9	0.28896	small	0.165308	small	0.111771	small	0.641665	medium	0.175604	small	0.167098	small	0.202441	small	-0.0409001	small	-0.109613	small	-0.178513	small	0.315298	small	-0.118443	small	-0.129275	small	-0.0672236	small	-0.341376	small	-0.553392	medium	-0.44834	small	-0.457939	small	-0.362496	small	-0.706575	medium	-0.0574016	small	0.0107149	small	0.0424202	small
293	1106.61	1	34217.5	0.336122	small	0.259168	small	0.209404	small	0.76301	medium	0.302171	small	0.29258	small	0.299238	small	0.0572485	small	-0.0450674	small	-0.117054	small	0.38352	small	-0.0390882	small	-0.0570697	small	-0.0126034	small	-0.297197	small	-0.559416	medium	-0.432179	small	-0.453509	small	-0.368942	small	-0.725139	medium	-0.0778092	small	0.0176941	small	0.0236708	small
294	1107.61	3	3044.31	0.44916	small	0.396634	small	0.363427	small	0.940343	large	0.441966	small	0.48268	small	0.471686	small	0.214375	small	0.00633652	small	-0.0540944	small	0.442968	small	-0.00168329	small	0.0167825	small	0.0561599	small	-0.252332	small	-0.535694	medium	-0.442391	small	-0.437633	small	-0.353304	small	-0.726699	medium	-0.0521664	small	-0.0183573	small	0.0574332	small
295	1108.61	2	6294.59	0.0786297	small	-0.0354156	small	-0.0693235	small	0.255451	small	-0.0467877	small	-0.0691695	small	-0.143073	small	-0.00214416	small	-0.10926	small	-0.141759	small	0.156555	small	-0.118548	small	-0.134922	small	-0.204895	small	-0.0802218	small	-0.308847	small	-0.283778	small	-0.284567	small	-0.360908	small	-0.255847	small	-0.0238507	small	0.0236802	small	-0.0935744	small
296	1109.67	4	1269.91	0.535109	medium	0.563096	medium	0.527492	medium	1.13218	large	0.64012	medium	0.731421	medium	0.628027	medium	0.357649	small	0.0829692	small	0.0291406	small	0.491063	small	0.087981	small	0.202193	small	0.0669572	small	-0.187408	small	-0.480603	small	-0.413968	small	-0.264272	small	-0.441607	small	-0.716994	medium	-0.0582579	small	-0.121536	small	-0.0224742	small
297	1110.59	1	67869.9	0.0158997	small	-1.02491	large	-0.827512	large	-0.727874	medium	-1.00072	large	-0.70749	medium	-0.815979	large	-0.556299	medium	-0.911554	large	-0.726946	medium	-0.566152	medium	-0.802097	large	-0.578692	medium	-0.661475	medium	-0.463902	small	0.204508	small	-0.558866	medium	0.171243	small	0.0118631	small	0.393993	small	0.486079	small	-0.537754	medium	0.420345	small
298	1110.76	4	1193.37	0.123141	small	-0.876244	large	-0.702142	medium	-0.619774	medium	-0.897559	large	-0.588704	medium	-0.723648	medium	-0.470632	small	-0.854109	large	-0.687449	medium	-0.498785	small	-0.714925	medium	-0.521486	medium	-0.605215	medium	-0.44884	small	0.157082	small	-0.551166	medium	0.14025	small	-0.0461881	small	0.325907	small	0.463238	small	-0.509201	medium	0.410554	small
299	1111.6	1	30382	0.0613646	small	-0.937278	large	-0.756509	medium	-0.641999	medium	-0.975369	large	-0.643539	medium	-0.750627	medium	-0.528959	medium	-0.902881	large	-0.724638	medium	-0.536499	medium	-0.821634	large	-0.570181	medium	-0.652074	medium	-0.485799	small	0.114871	small	-0.650068	medium	0.100223	small	-0.0595815	small	0.265258	small	0.497883	small	-0.575536	medium	0.45063	small
300	1111.8	5	333.119	0.146216	small	-0.649901	medium	-0.529944	medium	-0.446781	small	-0.749842	medium	-0.448444	small	-0.588039	medium	-0.361453	small	-0.752619	medium	-0.618998	medium	-0.437281	small	-0.691203	medium	-0.477231	small	-0.576236	medium	-0.419209	small	0.0337765	small	-0.43161	small	0.0379087	small	-0.145898	small	0.173669	small	0.37331	small	-0.400822	small	0.251175	small
301	1112.61	2	8640.47	0.0949432	small	-0.825515	large	-0.66673	medium	-0.573809	medium	-0.978209	large	-0.585239	medium	-0.710161	medium	-0.471148	small	-0.863665	large	-0.697905	medium	-0.518913	medium	-0.865354	large	-0.56291	medium	-0.66035	medium	-0.477775	small	0.0535278	small	-0.609082	medium	0.0472186	small	-0.115018	small	0.192241	small	0.488196	small	-0.556384	medium	0.412914	small
302	1112.75	5	85.3743	0.203793	small	-0.320905	small	-0.271205	small	-0.152028	small	-0.465305	small	-0.222914	small	-0.354547	small	-0.194587	small	-0.558455	medium	-0.494108	small	-0.321285	small	-0.629022	medium	-0.404829	small	-0.526175	medium	-0.385823	small	-0.108645	small	-0.357578	small	-0.0728988	small	-0.222653	small	-0.0384628	small	0.224808	small	-0.261555	small	0.123944	small
303	1113.63	3	3439.08	-0.0649642	small	-0.43446	small	-0.393033	small	-0.42801	small	-0.556836	medium	-0.435446	small	-0.571586	medium	-0.196548	small	-0.353572	small	-0.310596	small	-0.321132	small	-0.449273	small	-0.338742	small	-0.461964	small	-0.117101	small	0.0372602	small	-0.113924	small	-0.0124753	small	-0.129678	small	0.236837	small	0.149534	small	-0.0975508	small	-0.0167399	small
304	1114.32	5	559.546	-0.50068	medium	-0.239424	small	-0.245228	small	-0.481218	small	-0.1503	small	-0.389334	small	-0.379259	small	0.003435	small	0.25249	small	0.247071	small	0.035545	small	0.340134	small	0.0989104	small	0.130365	small	0.503611	medium	0.213927	small	0.312581	small	0.065229	small	0.0977754	small	0.488349	small	-0.0957277	small	0.234206	small	-0.218956	small
305	1114.59	4	1191.15	0.367026	small	0.381972	small	0.325744	small	0.613466	medium	0.525664	medium	0.390584	small	0.312611	small	0.311192	small	0.0448612	small	-0.0207921	small	0.23895	small	0.163682	small	0.043123	small	-0.051785	small	-0.0549452	small	-0.258798	small	-0.0744117	small	-0.17892	small	-0.287488	small	-0.293479	small	-0.182381	small	0.112217	small	-0.213303	small
306	1115.38	5	500.482	-0.371108	small	-0.215759	small	-0.217158	small	-0.319955	small	-0.187929	small	-0.297008	small	-0.412635	small	0.0269245	small	0.143581	small	0.143322	small	0.0605599	small	0.171898	small	0.0590344	small	-0.0305219	small	0.394673	small	0.0844308	small	0.114611	small	0.00175144	small	-0.0947464	small	0.346488	small	-0.0303453	small	0.107284	small	-0.206646	small
307	1115.6	2	6731.77	0.128801	small	0.27217	small	0.233152	small	0.695379	medium	0.287598	small	0.364676	small	0.1028	small	0.256212	small	0.142214	small	0.102567	small	0.467332	small	0.135681	small	0.22292	small	-0.0329455	small	0.0976229	small	-0.370855	small	-0.356062	small	-0.181056	small	-0.563053	medium	-0.451756	small	-0.0309209	small	-0.110566	small	-0.181945	small
308	1116.58	4	1251.01	0.717008	medium	0.517018	medium	0.486814	small	1.11309	large	0.541991	medium	0.78341	medium	0.540791	medium	0.251806	small	-0.119031	small	-0.157902	small	0.307034	small	-0.170934	small	0.134578	small	-0.188319	small	-0.474848	small	-0.464426	small	-0.487582	small	-0.137167	small	-0.514339	medium	-0.837493	large	0.00579535	small	-0.289388	small	-0.0144955	small
309	1117.59	4	1043.3	0.709074	medium	0.56535	medium	0.540336	medium	1.28369	very large	0.606898	medium	0.848399	large	0.61826	medium	0.310717	small	-0.0495598	small	-0.1086	small	0.492318	small	-0.109054	small	0.157798	small	-0.106589	small	-0.398393	small	-0.637553	medium	-0.61271	medium	-0.317838	small	-0.61075	medium	-0.915021	large	-0.00181048	small	-0.265444	small	0.00314142	small
310	1120.61	1	9848.84	0.00554457	small	0.303128	small	0.273428	small	0.59002	medium	0.29755	small	0.345108	small	0.214474	small	0.27079	small	0.287331	small	0.255649	small	0.51656	medium	0.267603	small	0.310615	small	0.190878	small	0.242903	small	-0.298899	small	-0.294907	small	-0.197403	small	-0.373485	small	-0.337055	small	-0.014234	small	-0.0676611	small	-0.0819182	small
311	1121.61	1	12872.5	-0.183832	small	0.0131567	small	0.000653559	small	-0.0334857	small	0.0582471	small	-0.00344549	small	-0.0770489	small	0.0780219	small	0.270703	small	0.255165	small	0.199843	small	0.327737	small	0.233571	small	0.151039	small	0.365673	small	0.0511343	small	0.13095	small	0.0421938	small	-0.0581452	small	0.165962	small	-0.079617	small	0.08096	small	-0.190453	small
312	1123.61	4	868.918	0.256708	small	-0.038094	small	-0.00792688	small	0.0219875	small	-0.103822	small	0.0392054	small	-0.0128689	small	-0.0420878	small	-0.683177	medium	-0.583807	medium	-0.36963	small	-0.664037	medium	-0.389605	small	-0.492735	small	-0.54322	medium	-0.0901908	small	-0.434601	small	0.0381374	small	-0.115753	small	-0.196696	small	0.293478	small	-0.433338	small	0.308951	small
313	1124.62	2	5866.21	-0.0538927	small	-0.11437	small	-0.0932768	small	-0.0945435	small	-0.0948527	small	-0.0938608	small	-0.112524	small	-0.016572	small	-0.0663279	small	-0.046428	small	-0.124962	small	-0.0952479	small	-0.0934044	small	-0.141208	small	0.0936122	small	0.087253	small	0.0354876	small	0.0297119	small	-0.0122916	small	0.244857	small	0.0523266	small	0.00314141	small	-0.0481912	small
314	1125.6	4	870.402	0.130834	small	0.15113	small	0.121311	small	0.185386	small	0.0885374	small	0.12142	small	0.122254	small	0.0348623	small	-0.11824	small	-0.159596	small	0.323783	small	-0.182341	small	-0.0332429	small	-0.0293515	small	-0.434712	small	-0.487041	small	-0.498281	small	-0.348237	small	-0.323596	small	-0.764696	medium	0.0171913	small	-0.146449	small	0.140253	small
315	1126.61	4	859.367	0.128479	small	0.131604	small	0.103811	small	0.16972	small	0.0845274	small	0.126781	small	0.103476	small	0.0129466	small	-0.117042	small	-0.151954	small	0.187164	small	-0.132383	small	-0.00138219	small	-0.0763373	small	-0.370707	small	-0.363081	small	-0.332296	small	-0.189094	small	-0.285366	small	-0.618701	medium	-0.013255	small	-0.131388	small	0.0624257	small
316	1127.61	1	14985.8	-0.0221119	small	0.0895882	small	0.0604498	small	0.0988695	small	0.0892245	small	0.0762696	small	0.02394	small	0.0408211	small	0.238032	small	0.197289	small	0.36624	small	0.305484	small	0.26713	small	0.131479	small	0.184407	small	-0.191647	small	-0.0679727	small	-0.094952	small	-0.25481	small	-0.219997	small	-0.120128	small	0.0305286	small	-0.184821	small
317	1129.63	4	736.731	0.184126	small	0.302749	small	0.255391	small	0.312909	small	0.202085	small	0.26285	small	0.222921	small	0.110617	small	0.0795653	small	0.0397743	small	0.454896	small	0.0498547	small	0.236335	small	0.120302	small	-0.250581	small	-0.463197	small	-0.405993	small	-0.230382	small	-0.350348	small	-0.710091	medium	-0.010593	small	-0.185115	small	0.0683784	small
318	1130.63	4	857.523	0.297135	small	0.462178	small	0.376213	small	0.57168	medium	0.430032	small	0.460054	small	0.318468	small	0.156447	small	0.130493	small	0.0285796	small	0.601271	medium	0.256818	small	0.323872	small	0.0450071	small	-0.307187	small	-0.619616	medium	-0.328703	small	-0.274893	small	-0.574248	medium	-0.862236	large	-0.231314	small	-0.0584607	small	-0.221374	small
319	1132.6	1	9644.9	0.202048	small	0.345319	small	0.305668	small	0.55257	medium	0.255004	small	0.458184	small	0.208563	small	0.138302	small	0.12894	small	0.0964617	small	0.534359	medium	0.0675825	small	0.356673	small	0.00192127	small	-0.114522	small	-0.475883	small	-0.527943	medium	-0.144349	small	-0.575731	medium	-0.717733	medium	0.0366879	small	-0.323262	small	-0.0714337	small
320	1133.58	2	6815.41	0.254259	small	0.30268	small	0.296914	small	0.628221	medium	0.197974	small	0.534375	medium	0.219047	small	0.119586	small	0.0555692	small	0.0526898	small	0.400456	small	-0.0848627	small	0.315937	small	-0.0478411	small	-0.167913	small	-0.355173	small	-0.535919	medium	-0.0486522	small	-0.467381	small	-0.612407	medium	0.130579	small	-0.410069	small	0.0363268	small
321	1134.59	2	4391.28	0.0940777	small	0.314631	small	0.311454	small	0.562067	medium	0.269058	small	0.493486	small	0.22836	small	0.239584	small	0.219059	small	0.213758	small	0.42604	small	0.158975	small	0.380254	small	0.122546	small	0.128601	small	-0.223668	small	-0.306144	small	-0.0183766	small	-0.326723	small	-0.354521	small	0.0675782	small	-0.258571	small	-0.0345735	small
322	1135.68	4	1481.88	0.455458	small	0.556233	medium	0.544177	medium	0.975842	large	0.566867	medium	0.811542	large	0.565352	medium	0.388901	small	0.134893	small	0.122338	small	0.415252	small	0.0654927	small	0.366288	small	0.0767611	small	-0.101661	small	-0.288697	small	-0.392409	small	-0.00702932	small	-0.36221	small	-0.580429	medium	0.0649348	small	-0.33087	small	0.0142873	small
323	1136.61	3	1823.64	0.118121	small	0.280911	small	0.297902	small	0.374635	small	0.200175	small	0.460175	small	0.156967	small	0.282966	small	0.155127	small	0.171385	small	0.228895	small	0.0687887	small	0.322855	small	0.0281396	small	0.145212	small	-0.0666577	small	-0.184356	small	0.106661	small	-0.227547	small	-0.107066	small	0.108507	small	-0.281136	small	-0.044256	small
324	1137.64	2	9330.2	0.271943	small	0.0962907	small	0.116179	small	0.355983	small	-0.05021	small	0.363166	small	-0.0685446	small	0.0591077	small	-0.162656	small	-0.141953	small	0.0665944	small	-0.309264	small	0.096588	small	-0.311234	small	-0.22741	small	-0.210717	small	-0.388325	small	0.0318055	small	-0.376167	small	-0.320698	small	0.159314	small	-0.392889	small	-0.0204259	small
325	1138.6	2	6591.75	0.528644	medium	0.254747	small	0.238462	small	0.574896	medium	0.197902	small	0.495698	small	0.205889	small	0.00558363	small	-0.273173	small	-0.278772	small	0.039074	small	-0.373856	small	-0.00088616	small	-0.297557	small	-0.594016	medium	-0.31908	small	-0.432478	small	-0.0366279	small	-0.3277	small	-0.693936	medium	0.0668395	small	-0.344968	small	0.0341105	small
326	1139.61	2	7830.51	0.611851	medium	0.174226	small	0.177037	small	0.492765	small	0.0795285	small	0.437034	small	0.126698	small	-0.0463404	small	-0.36771	small	-0.340918	small	-0.131213	small	-0.533903	medium	-0.0625022	small	-0.402388	small	-0.674643	medium	-0.210632	small	-0.413589	small	0.0467837	small	-0.270031	small	-0.585023	medium	0.116064	small	-0.367405	small	0.0599644	small
327	1140.62	1	46252.6	0.30114	small	-0.83797	large	-0.666146	medium	-0.597483	medium	-0.843594	large	-0.480156	small	-0.707305	medium	-0.489533	small	-0.847543	large	-0.697746	medium	-0.45601	small	-0.60685	medium	-0.476306	small	-0.556444	medium	-0.486202	small	0.179128	small	-0.577042	medium	0.262218	small	-0.0770799	small	0.303883	small	0.452459	small	-0.591632	medium	0.340252	small
328	1141.62	1	21477.4	0.314791	small	-0.856241	large	-0.677817	medium	-0.628451	medium	-0.885518	large	-0.497225	small	-0.743068	medium	-0.485469	small	-0.833567	large	-0.686354	medium	-0.447692	small	-0.592262	medium	-0.470123	small	-0.546004	medium	-0.473195	small	0.198065	small	-0.557203	medium	0.278379	small	-0.0772326	small	0.339706	small	0.470296	small	-0.614067	medium	0.337909	small
329	1142.35	5	403.196	-0.269434	small	-0.478118	small	-0.439097	small	-0.781083	medium	-0.518191	medium	-0.553063	medium	-0.669557	medium	-0.147572	small	-0.194124	small	-0.151833	small	-0.427464	small	-0.213831	small	-0.247697	small	-0.344831	small	0.134717	small	0.307624	small	0.234311	small	0.189798	small	0.10466	small	0.64418	medium	0.0710666	small	0.0393241	small	-0.134589	small
330	1142.62	3	3596.54	0.365182	small	-0.678871	medium	-0.539466	medium	-0.508997	medium	-0.839256	large	-0.374806	small	-0.675333	medium	-0.411794	small	-0.864502	large	-0.715069	medium	-0.459688	small	-0.643102	medium	-0.483099	small	-0.585544	medium	-0.506283	medium	0.0825326	small	-0.474236	small	0.203811	small	-0.175504	small	0.159781	small	0.419209	small	-0.597074	medium	0.25789	small
331	1143.65	2	5926.62	0.753947	medium	0.504225	medium	0.445359	small	1.07367	large	0.724139	medium	0.629707	medium	0.567839	medium	0.253303	small	-0.138372	small	-0.285894	small	0.266722	small	0.0346815	small	-0.12459	small	-0.19786	small	-0.514089	medium	-0.597822	medium	-0.214816	small	-0.386307	small	-0.465021	small	-0.799479	medium	-0.311807	small	0.150386	small	-0.218169	small
332	1144.65	2	7933.8	0.543658	medium	0.72878	medium	0.668475	medium	1.38676	very large	1.01088	large	0.912794	large	0.793741	medium	0.506714	medium	0.288181	small	0.181657	small	0.755042	medium	0.474572	small	0.365915	small	0.238353	small	-0.0477842	small	-0.603996	medium	-0.26148	small	-0.374238	small	-0.51837	medium	-0.825136	large	-0.304432	small	0.112632	small	-0.246759	small
333	1146.52	2	5975.64	-0.174654	small	0.183268	small	0.138396	small	0.189777	small	0.30382	small	0.126879	small	0.0197354	small	0.258285	small	0.364446	small	0.317544	small	0.35388	small	0.474834	small	0.293209	small	0.198982	small	0.4322	small	-0.0555023	small	0.113032	small	-0.0585957	small	-0.180673	small	0.0650695	small	-0.16745	small	0.168957	small	-0.29706	small
334	1147.65	5	337.1	0.552927	medium	0.62757	medium	0.58347	medium	1.1257	large	0.731702	medium	0.818369	large	0.60736	medium	0.437783	small	0.123028	small	0.0588961	small	0.504204	medium	0.173032	small	0.260713	small	0.0429975	small	-0.124123	small	-0.459927	small	-0.329637	small	-0.232593	small	-0.469819	small	-0.650878	medium	-0.115123	small	-0.0902842	small	-0.132564	small
335	1148.65	2	6702.19	-0.186695	small	-0.139016	small	-0.117328	small	-0.134446	small	-0.210468	small	-0.100185	small	-0.282078	small	0.0125463	small	0.0455185	small	0.0678925	small	0.0528897	small	-0.0205632	small	0.0773636	small	-0.0819052	small	0.197057	small	0.0138241	small	-0.0746764	small	0.0259345	small	-0.141573	small	0.145752	small	0.089365	small	-0.0983886	small	-0.0613744	small
336	1149.63	4	682.257	0.703154	medium	0.359735	small	0.376078	small	0.709318	medium	0.264766	small	0.694859	medium	0.372285	small	0.143617	small	-0.263087	small	-0.246919	small	-0.023225	small	-0.404212	small	0.064261	small	-0.326106	small	-0.533189	medium	-0.221753	small	-0.380905	small	0.0805316	small	-0.304953	small	-0.518513	medium	0.136898	small	-0.425308	small	0.0897339	small
337	1150.64	5	617.015	0.790242	medium	0.528891	medium	0.540008	medium	0.984134	large	0.495021	small	0.895713	large	0.592577	medium	0.3061	small	-0.161585	small	-0.156377	small	0.106066	small	-0.280125	small	0.168033	small	-0.216343	small	-0.474062	small	-0.261467	small	-0.394325	small	0.0667619	small	-0.334639	small	-0.609347	medium	0.111153	small	-0.425002	small	0.0719812	small
338	1151.62	4	876.5	0.834191	large	0.698887	medium	0.742109	medium	1.45619	very large	0.833666	large	1.04594	large	1.03136	large	0.770409	medium	0.212664	small	0.239149	small	0.684269	medium	-0.0416289	small	0.125536	small	0.48289	small	0.122205	small	-0.380228	small	-0.743131	medium	-0.604322	medium	-0.0980463	small	-0.491344	small	0.270598	small	-0.175126	small	0.521009	medium
339	1152.63	4	730.185	0.84525	large	0.520276	medium	0.737109	medium	1.05311	large	0.716243	medium	0.876229	large	1.0111	large	0.725069	medium	0.143036	small	0.144051	small	0.692239	medium	-0.0958261	small	0.0293497	small	0.374307	small	0.0177305	small	-0.842485	large	-0.732483	medium	-0.669989	medium	-0.485553	small	-0.676084	medium	0.218469	small	-0.124064	small	0.443999	small
340	1153.64	5	567.728	0.76587	medium	0.620965	medium	0.737827	medium	1.24272	very large	0.729195	medium	0.905688	large	0.930758	large	0.631311	medium	0.131186	small	0.0900073	small	0.74343	medium	-0.017138	small	0.18653	small	0.205465	small	-0.113994	small	-0.873408	large	-0.755762	medium	-0.607132	medium	-0.603808	medium	-0.810259	large	0.105146	small	-0.199837	small	0.218606	small
341	1154.62	2	7581.1	0.239353	small	0.322821	small	0.322665	small	0.652639	medium	0.225057	small	0.492421	small	0.192555	small	0.294387	small	0.0896348	small	0.08831	small	0.400967	small	-0.0339769	small	0.264466	small	-0.0579555	small	0.0360432	small	-0.333076	small	-0.48189	small	-0.110982	small	-0.483817	small	-0.409358	small	0.124302	small	-0.314697	small	-0.0278589	small
342	1155.62	4	1182.46	0.676544	medium	0.478333	small	0.477133	small	0.865091	large	0.402131	small	0.770804	medium	0.459275	small	0.285503	small	-0.147152	small	-0.131398	small	0.148183	small	-0.316717	small	0.176175	small	-0.226341	small	-0.413107	small	-0.271081	small	-0.501305	medium	0.0446081	small	-0.386031	small	-0.594639	medium	0.147496	small	-0.454472	small	0.0810455	small
343	1156.64	3	2325.17	0.28882	small	0.338249	small	0.331102	small	0.397081	small	0.353935	small	0.487654	small	0.195074	small	0.332688	small	0.0502374	small	0.0444029	small	0.0894804	small	0.0509763	small	0.195851	small	-0.0994441	small	0.0294688	small	-0.0459063	small	-0.042397	small	0.110176	small	-0.198443	small	-0.0653404	small	-0.0055236	small	-0.154691	small	-0.157191	small
344	1158.66	2	8805.72	0.0164629	small	0.318424	small	0.262871	small	0.316908	small	0.464131	small	0.283957	small	0.172623	small	0.318204	small	0.2976	small	0.241756	small	0.286562	small	0.434217	small	0.257952	small	0.150647	small	0.292527	small	-0.0621489	small	0.146255	small	-0.0216117	small	-0.162495	small	-0.0105713	small	-0.205902	small	0.159266	small	-0.311523	small
345	1159.65	5	601.582	0.674106	medium	0.729549	medium	0.664046	medium	1.23784	very large	0.962954	large	0.873031	large	0.754054	medium	0.492285	small	0.105411	small	-0.00143434	small	0.471964	small	0.26224	small	0.175059	small	0.0409349	small	-0.22196	small	-0.523026	medium	-0.219829	small	-0.303005	small	-0.457637	small	-0.751275	medium	-0.279807	small	0.0874871	small	-0.232008	small
346	1160.63	5	598.896	0.674916	medium	0.61489	medium	0.568493	medium	1.17122	large	0.806626	large	0.834627	large	0.638296	medium	0.385451	small	0.0474446	small	-0.037525	small	0.47671	small	0.124193	small	0.208921	small	-0.0426653	small	-0.313393	small	-0.542555	medium	-0.366361	small	-0.24451	small	-0.519361	medium	-0.8001	large	-0.159104	small	-0.0960364	small	-0.168063	small
347	1163.65	3	1784.03	1.02993	large	0.724622	medium	0.809288	large	1.59175	very large	0.580071	medium	1.17808	large	1.1359	large	0.625595	medium	-0.15295	small	-0.0984115	small	0.304659	small	-0.54657	medium	0.162878	small	-0.0199323	small	-0.47454	small	-0.433869	small	-0.94889	large	-0.134069	small	-0.351795	small	-0.85093	large	0.417913	small	-0.704789	medium	0.582045	medium
348	1164.65	4	1370.6	0.937448	large	0.783384	medium	0.851359	large	1.72654	very large	0.706346	medium	1.20833	very large	1.20368	very large	0.671422	medium	-0.0628978	small	-0.0263372	small	0.399376	small	-0.381911	small	0.211655	small	0.0660353	small	-0.383125	small	-0.482067	small	-0.928515	large	-0.184984	small	-0.386373	small	-0.913852	large	0.356859	small	-0.627109	medium	0.521362	medium
349	1165.63	4	894.178	0.685519	medium	0.712439	medium	0.747448	medium	1.49801	very large	0.720462	medium	1.05919	large	1.01256	large	0.528227	medium	-0.117038	small	-0.138554	small	0.171763	small	-0.144595	small	0.0522937	small	-0.0496565	small	-0.3677	small	-0.438269	small	-0.423223	small	-0.169754	small	-0.3358	small	-0.861823	large	0.0404317	small	-0.251942	small	0.134194	small
350	1166.14	2	8531.65	-0.00195016	small	0.221164	small	0.203163	small	0.268547	small	0.254375	small	0.262406	small	0.129006	small	0.212078	small	0.20777	small	0.186543	small	0.214332	small	0.215915	small	0.222931	small	0.109603	small	0.179645	small	-0.0735632	small	-0.0218749	small	0.000112591	small	-0.153523	small	-0.0718295	small	-0.05223	small	-0.0212495	small	-0.133411	small
351	1167.67	5	591.617	0.774484	medium	0.581164	medium	0.582761	medium	1.05551	large	0.6002	medium	0.909288	large	0.695349	medium	0.341886	small	-0.128844	small	-0.135492	small	0.138876	small	-0.207958	small	0.144338	small	-0.124941	small	-0.455479	small	-0.285999	small	-0.373064	small	0.0106598	small	-0.282596	small	-0.661413	medium	0.069462	small	-0.353381	small	0.0882107	small
352	1168.66	3	3227.33	0.530436	medium	0.432166	small	0.426924	small	0.951687	large	0.451877	small	0.814926	large	0.394499	small	0.210579	small	-0.101469	small	-0.0792743	small	0.0881385	small	-0.223882	small	0.286968	small	-0.272903	small	-0.39235	small	-0.183437	small	-0.463191	small	0.216342	small	-0.560458	medium	-0.768811	medium	0.137847	small	-0.530944	medium	-0.0755467	small
353	1169.68	2	7037.35	0.510845	medium	0.430378	small	0.44605	small	0.696758	medium	0.371915	small	0.792228	medium	0.397702	small	0.248839	small	-0.0862698	small	-0.0523065	small	0.0274383	small	-0.220101	small	0.279508	small	-0.203791	small	-0.326173	small	-0.0852181	small	-0.321292	small	0.257751	small	-0.3039	small	-0.478711	small	0.165119	small	-0.517827	medium	0.0215557	small
354	1170.67	4	910.738	1.05157	large	0.550414	medium	0.569886	medium	1.08955	large	0.503915	medium	0.959927	large	0.690331	medium	0.30532	small	-0.379525	small	-0.346064	small	-0.117757	small	-0.551063	medium	0.0302511	small	-0.426174	small	-0.724502	medium	-0.229768	small	-0.465111	small	0.131298	small	-0.328959	small	-0.668205	medium	0.173453	small	-0.522448	medium	0.149493	small
355	1171.66	4	768.09	0.886809	large	0.516465	medium	0.514081	medium	0.914152	large	0.549842	medium	0.830288	large	0.59513	medium	0.298755	small	-0.271816	small	-0.275124	small	-0.0710107	small	-0.323251	small	0.0181609	small	-0.321838	small	-0.554432	medium	-0.204908	small	-0.259964	small	0.0813201	small	-0.261846	small	-0.511207	medium	0.0403073	small	-0.316885	small	0.0126094	small
356	1172.63	4	948.962	1.06655	large	0.535383	medium	0.541176	medium	0.829118	large	0.613858	medium	0.83703	large	0.638773	medium	0.377737	small	-0.364412	small	-0.369428	small	-0.283261	small	-0.370005	small	-0.0967831	small	-0.43956	small	-0.602801	medium	-0.0865738	small	-0.0879243	small	0.155854	small	-0.142677	small	-0.320243	small	7.73389e-06	small	-0.241228	small	-0.0409095	small
357	1173.62	4	959.776	0.978011	large	0.631278	medium	0.629263	medium	1.08453	large	0.699736	medium	0.921237	large	0.750658	medium	0.448376	small	-0.188797	small	-0.210215	small	0.0384218	small	-0.216998	small	0.0405826	small	-0.211326	small	-0.491296	small	-0.244744	small	-0.248137	small	0.00438281	small	-0.246748	small	-0.531577	medium	0.00323757	small	-0.237954	small	0.0128848	small
358	1174.63	5	554.548	0.741762	medium	0.563635	medium	0.527519	medium	0.974854	large	0.705094	medium	0.758548	medium	0.589833	medium	0.378793	small	-0.0614006	small	-0.126942	small	0.194893	small	0.0228116	small	0.0736082	small	-0.129706	small	-0.339485	small	-0.315428	small	-0.155818	small	-0.105806	small	-0.31581	small	-0.529395	medium	-0.145068	small	-0.0478224	small	-0.142751	small
359	1175.59	2	8881.57	0.037389	small	-0.735951	medium	-0.642142	medium	-0.61745	medium	-0.787213	medium	-0.583724	medium	-0.71739	medium	-0.453175	small	-0.632219	medium	-0.532766	medium	-0.412977	small	-0.556277	medium	-0.426757	small	-0.506871	medium	-0.344022	small	0.103768	small	-0.145296	small	0.0825972	small	-0.0513642	small	0.249115	small	0.238896	small	-0.222607	small	0.0976514	small
360	1176.67	3	2288.78	0.293696	small	-0.477974	small	-0.386589	small	-0.287023	small	-0.661383	medium	-0.260638	small	-0.447009	small	-0.351441	small	-0.823626	large	-0.70057	medium	-0.477043	small	-0.821922	large	-0.503129	medium	-0.6543	medium	-0.578288	medium	-0.0529585	small	-0.469112	small	0.0504062	small	-0.167371	small	-0.0575205	small	0.355088	small	-0.488946	small	0.314709	small
361	1177.67	3	3897.17	0.0989051	small	-0.441953	small	-0.380237	small	-0.458649	small	-0.568709	medium	-0.313652	small	-0.528436	medium	-0.279259	small	-0.527297	medium	-0.457965	small	-0.459939	small	-0.584269	medium	-0.363404	small	-0.547839	medium	-0.338199	small	0.10975	small	-0.0942343	small	0.146699	small	-0.0419897	small	0.205065	small	0.20366	small	-0.244104	small	0.0568683	small
362	1179.48	2	8086.59	0.0196424	small	0.185287	small	0.159985	small	0.259266	small	0.231223	small	0.208459	small	0.0617795	small	0.205942	small	0.163248	small	0.137739	small	0.228897	small	0.204986	small	0.182532	small	0.039996	small	0.180409	small	-0.0991965	small	-0.0329699	small	-0.0380869	small	-0.208129	small	-0.0609561	small	-0.0677974	small	0.00881809	small	-0.175936	small
363	1179.66	5	480.57	0.770108	medium	0.574479	medium	0.592197	medium	0.995951	large	0.604973	medium	0.908231	large	0.671807	medium	0.387687	small	-0.0811556	small	-0.114108	small	0.087738	small	-0.0570354	small	0.150805	small	-0.11529	small	-0.400852	small	-0.205984	small	-0.130934	small	0.0684216	small	-0.213821	small	-0.543943	medium	-0.0458528	small	-0.191427	small	-0.0438399	small
364	1180.66	3	2749.73	0.826681	large	0.773978	medium	0.807919	large	1.46221	very large	0.981602	large	1.13721	large	0.98704	large	0.60832	medium	0.0440834	small	-0.0406174	small	0.587434	medium	0.0200695	small	0.170638	small	0.00735381	small	-0.290679	small	-0.794874	medium	-0.631994	medium	-0.478837	small	-0.640633	medium	-0.903815	large	-0.0655959	small	-0.169745	small	-0.0145578	small
365	1182.65	2	8282.93	0.53207	medium	0.935775	large	0.90461	large	1.71104	very large	1.16879	large	1.12955	large	1.13674	large	0.716819	medium	0.447375	small	0.37206	small	0.987445	large	0.517134	medium	0.487356	small	0.525939	medium	0.102954	small	-0.740377	medium	-0.575354	medium	-0.578047	medium	-0.497255	small	-1.00529	large	-0.140373	small	0.0217512	small	0.0425076	small
366	1182.73	5	419.195	0.721303	medium	0.885643	large	0.870239	large	1.83412	very large	1.10341	large	1.14128	large	1.19083	large	0.687567	medium	0.357097	small	0.291158	small	0.99557	large	0.413278	small	0.416065	small	0.525545	medium	-0.0396895	small	-0.689209	medium	-0.54921	medium	-0.56825	medium	-0.399913	small	-1.0513	large	-0.103423	small	0.00943601	small	0.12637	small
367	1183.65	2	5111.35	0.329786	small	0.930286	large	0.883496	large	1.71598	very large	1.09162	large	1.01001	large	1.14205	large	0.71668	medium	0.61072	medium	0.541479	medium	1.16227	large	0.675683	medium	0.589633	medium	0.73568	medium	0.315708	small	-0.663042	medium	-0.512425	medium	-0.621233	medium	-0.390638	small	-0.969857	large	-0.133268	small	0.100583	small	0.0939285	small
368	1184.56	3	3077.01	0.409434	small	0.88636	large	0.860437	large	1.72909	very large	0.987176	large	1.01065	large	1.09535	large	0.676907	medium	0.485585	small	0.423546	small	1.07786	large	0.484436	small	0.485463	small	0.581143	medium	0.196566	small	-0.786523	medium	-0.66279	medium	-0.689362	medium	-0.548631	medium	-0.998039	large	-0.0753895	small	0.0109628	small	0.108023	small
369	1185.56	2	7003.86	0.179022	small	0.682359	medium	0.638433	medium	1.13088	large	0.669595	medium	0.6712	medium	0.684606	medium	0.549465	medium	0.464811	small	0.413977	small	0.816217	large	0.420239	small	0.430125	small	0.435364	small	0.310615	small	-0.559657	medium	-0.535856	medium	-0.457914	small	-0.498537	small	-0.663733	medium	-0.0234142	small	-0.0374692	small	0.0261115	small
370	1187.68	3	3220.05	0.402524	small	0.474508	small	0.459307	small	0.659348	medium	0.466922	small	0.60634	medium	0.405663	small	0.384494	small	0.03117	small	0.0177642	small	0.184202	small	0.00386999	small	0.162539	small	-0.0466599	small	-0.0681227	small	-0.198793	small	-0.222864	small	-0.0251051	small	-0.276109	small	-0.303054	small	0.0150079	small	-0.183432	small	-0.0597024	small
371	1189.66	1	12706.8	0.496601	small	0.600138	medium	0.585836	medium	0.880447	large	0.625952	medium	0.801276	large	0.578662	medium	0.496297	small	0.0825436	small	0.0783142	small	0.243367	small	0.0181074	small	0.274819	small	0.00862318	small	-0.0729642	small	-0.185532	small	-0.297143	small	0.0481122	small	-0.280907	small	-0.38677	small	0.0671943	small	-0.301901	small	-0.0105	small
372	1189.68	5	529.42	1.07756	large	0.740296	medium	0.756604	medium	1.61463	very large	0.822731	large	1.11041	large	1.08935	large	0.594339	medium	-0.146912	small	-0.102904	small	0.126188	small	-0.402046	small	0.200839	small	-0.0865809	small	-0.506483	medium	-0.223501	small	-0.631478	medium	0.0919049	small	-0.233304	small	-0.726807	medium	0.244372	small	-0.553522	medium	0.337968	small
373	1190.66	4	1122.82	1.15735	large	0.773327	medium	0.780696	medium	1.66048	very large	0.889365	large	1.15882	large	1.08628	large	0.609006	medium	-0.174573	small	-0.150143	small	0.141519	small	-0.376289	small	0.160656	small	-0.133996	small	-0.551929	medium	-0.287674	small	-0.5851	medium	0.0361402	small	-0.293315	small	-0.770563	medium	0.18257	small	-0.496972	small	0.249516	small
374	1191.66	4	947.356	1.19779	large	0.789754	medium	0.787743	medium	1.55117	very large	0.945997	large	1.16867	large	1.02891	large	0.61402	medium	-0.195896	small	-0.218743	small	0.132376	small	-0.255867	small	0.089241	small	-0.22545	small	-0.568486	medium	-0.352911	small	-0.397852	small	-0.0327016	small	-0.371993	small	-0.73638	medium	0.0266432	small	-0.325219	small	0.0363487	small
375	1192.67	1	10563	0.206543	small	0.551809	medium	0.480338	small	0.587792	medium	0.775575	medium	0.575494	medium	0.428415	small	0.444231	small	0.326172	small	0.249468	small	0.328461	small	0.516909	medium	0.337371	small	0.18593	small	0.197427	small	-0.109806	small	0.190365	small	0.0146871	small	-0.179014	small	-0.175734	small	-0.307318	small	0.168695	small	-0.374401	small
376	1194.7	2	7832.55	1.04281	large	0.937394	large	0.932058	large	1.48635	very large	1.21854	very large	1.23979	very large	1.23892	very large	0.820334	large	0.0533672	small	0.0308924	small	0.221995	small	0.0554491	small	0.215377	small	0.164841	small	-0.315129	small	-0.195233	small	-0.188039	small	-0.000274344	small	-0.0585184	small	-0.588669	medium	-0.0216252	small	-0.176771	small	0.121192	small
377	1197.68	2	4705.34	0.851502	large	0.833757	large	0.800733	large	1.27469	very large	1.03003	large	1.02674	large	0.98438	large	0.64568	medium	0.0319287	small	-0.0109373	small	0.254188	small	0.0693773	small	0.159276	small	0.0830573	small	-0.291784	small	-0.28346	small	-0.215181	small	-0.08984	small	-0.180216	small	-0.62344	medium	-0.0818534	small	-0.104868	small	0.0191054	small
378	1198.74	1	29879.2	0.930704	large	0.646698	medium	0.723999	medium	1.5853	very large	0.815768	large	1.24403	very large	1.052	large	0.593638	medium	0.257526	small	0.224514	small	1.01849	large	0.190651	small	0.308116	small	0.456075	small	0.00282488	small	-0.931238	large	-0.802451	large	-0.832453	large	-0.576801	medium	-0.911775	large	0.046615	small	-0.0476379	small	0.244755	small
379	1199.74	2	9517.71	0.95978	large	0.676296	medium	0.753365	medium	1.64906	very large	0.827782	large	1.26993	very large	1.09269	large	0.612857	medium	0.247401	small	0.215031	small	1.01957	large	0.156675	small	0.299267	small	0.452614	small	-0.0232006	small	-0.915636	large	-0.819203	large	-0.827088	large	-0.564477	medium	-0.92773	large	0.067075	small	-0.0803933	small	0.271461	small
380	1200.74	2	8802.01	0.5642	medium	0.702812	medium	0.743199	medium	1.58836	very large	0.822917	large	1.02729	large	0.99705	large	0.634944	medium	0.331186	small	0.300566	small	1.00534	large	0.287826	small	0.368712	small	0.468768	small	0.128078	small	-0.824347	large	-0.733343	medium	-0.752821	medium	-0.547879	medium	-0.847629	large	0.0244983	small	-0.0375179	small	0.184463	small
381	1203.08	2	5719.11	-0.17951	small	0.179882	small	0.0868506	small	0.250779	small	0.412935	small	0.058721	small	-0.00328644	small	0.197706	small	0.358107	small	0.272376	small	0.422343	small	0.57388	medium	0.234946	small	0.180267	small	0.383844	small	-0.172716	small	0.167918	small	-0.18882	small	-0.263763	small	-0.066229	small	-0.34809	small	0.350114	small	-0.421912	small
382	1203.67	5	634.527	0.723678	medium	0.568877	medium	0.51067	medium	1.12126	large	0.784282	medium	0.761332	medium	0.581231	medium	0.339355	small	-0.0172983	small	-0.134568	small	0.317427	small	0.16047	small	0.0696924	small	-0.118234	small	-0.365409	small	-0.454055	small	-0.114871	small	-0.22978	small	-0.425999	small	-0.694333	medium	-0.293911	small	0.0933592	small	-0.260247	small
383	1204.7	2	5295.29	-0.163805	small	0.120158	small	0.0288693	small	0.0517759	small	0.402683	small	0.046977	small	-0.102889	small	0.135083	small	0.285779	small	0.196641	small	0.21576	small	0.563521	medium	0.206694	small	0.0664731	small	0.304644	small	-0.0237809	small	0.355103	small	-0.0034985	small	-0.160853	small	0.084916	small	-0.382127	small	0.347767	small	-0.519786	medium
384	1205.69	3	1942.93	0.0575622	small	0.235858	small	0.161541	small	0.221467	small	0.465715	small	0.24923	small	0.0763575	small	0.162217	small	0.177775	small	0.102824	small	0.158685	small	0.399427	small	0.188027	small	0.0174348	small	0.101195	small	-0.0588133	small	0.238389	small	0.031412	small	-0.14576	small	-0.0643409	small	-0.304836	small	0.204521	small	-0.389608	small
385	1206.54	2	5961.62	0.427302	small	0.216602	small	0.22884	small	0.125483	small	0.227949	small	0.461594	small	0.0768632	small	0.17453	small	-0.186167	small	-0.166425	small	-0.288484	small	-0.202639	small	0.0611907	small	-0.328643	small	-0.253436	small	0.111884	small	0.0991203	small	0.316252	small	-0.0417943	small	0.0473817	small	0.0233862	small	-0.249954	small	-0.139449	small
386	1209.34	1	9681.72	-0.254093	small	-0.0207518	small	-0.0194541	small	-0.163976	small	0.0278368	small	-0.00249794	small	-0.174724	small	0.109564	small	0.24004	small	0.23969	small	0.0914722	small	0.287621	small	0.242475	small	0.0899277	small	0.372577	small	0.147404	small	0.198494	small	0.153326	small	-0.00562829	small	0.286367	small	-0.0477758	small	0.0295064	small	-0.209693	small
387	1209.67	5	493.395	0.514001	medium	0.437346	small	0.433789	small	0.675199	medium	0.447151	small	0.656478	medium	0.438872	small	0.295768	small	-0.0370838	small	-0.046342	small	0.11735	small	-0.0671269	small	0.151102	small	-0.0737882	small	-0.223017	small	-0.164445	small	-0.187284	small	0.0371207	small	-0.192924	small	-0.355073	small	0.0197347	small	-0.217344	small	-0.00709573	small
388	1210.7	4	762.429	0.657145	medium	0.778304	medium	0.769407	medium	1.69481	very large	0.887151	large	0.967646	large	1.10226	large	0.557926	medium	0.266436	small	0.218842	small	0.918036	large	0.214305	small	0.308365	small	0.462675	small	-0.105311	small	-0.710286	medium	-0.719777	medium	-0.592957	medium	-0.419409	small	-1.0437	large	0.0217539	small	-0.101827	small	0.265102	small
389	1211.71	2	8033.18	0.739633	medium	0.810098	large	0.782148	medium	1.65353	very large	0.999791	large	1.05768	large	1.06715	large	0.629776	medium	0.160599	small	0.133226	small	0.570234	medium	0.080041	small	0.35381	small	0.215808	small	-0.206503	small	-0.436165	small	-0.60252	medium	-0.1458	small	-0.385657	small	-0.920596	large	0.0677999	small	-0.322645	small	0.163851	small
390	1212.7	2	5387.84	0.995143	large	0.787787	medium	0.785652	medium	1.50148	very large	0.937039	large	1.17254	large	1.00785	large	0.61719	medium	-0.0178388	small	-0.00523632	small	0.240688	small	-0.164122	small	0.273394	small	0.0707383	small	-0.423298	small	-0.227264	small	-0.453432	small	0.0575501	small	-0.152921	small	-0.741115	medium	0.137766	small	-0.437476	small	0.230821	small
391	1213.68	4	1379.94	1.28177	very large	0.697978	medium	0.716237	medium	1.58776	very large	0.827797	large	1.21372	very large	0.919748	large	0.588513	medium	-0.106922	small	-0.0862753	small	0.121832	small	-0.27761	small	0.137267	small	0.0764806	small	-0.602146	medium	-0.179544	small	-0.376623	small	0.0232663	small	-0.0159673	small	-0.721969	medium	0.139835	small	-0.37641	small	0.282818	small
392	1214.67	2	4337.37	0.621971	medium	0.588516	medium	0.568883	medium	0.895532	large	0.740228	medium	0.85998	large	0.683344	medium	0.38992	small	0.0823972	small	0.0574852	small	0.193438	small	0.125633	small	0.237423	small	0.155063	small	-0.236885	small	-0.116825	small	-0.0632028	small	0.048133	small	-0.00952971	small	-0.450728	small	-0.0582093	small	-0.111067	small	0.0453824	small
393	1215.68	3	3072.78	0.379908	small	0.544284	medium	0.49246	small	0.825674	large	0.835954	large	0.641279	medium	0.567591	medium	0.351678	small	0.247395	small	0.125777	small	0.381585	small	0.533266	medium	0.24371	small	0.184538	small	-0.0498902	small	-0.25818	small	0.241655	small	-0.132681	small	-0.18165	small	-0.471337	small	-0.521441	medium	0.359229	small	-0.39467	small
394	1217.66	3	3997.9	0.434956	small	0.590543	medium	0.536657	medium	0.824566	large	0.831447	large	0.729489	medium	0.523631	medium	0.441109	small	0.194071	small	0.0984381	small	0.305264	small	0.408592	small	0.263656	small	0.0594347	small	-0.0340164	small	-0.226551	small	0.134112	small	-0.0380429	small	-0.263947	small	-0.385609	small	-0.364426	small	0.173205	small	-0.369289	small
395	1217.73	5	255.194	0.92419	large	0.717274	medium	0.68738	medium	1.23559	very large	0.939367	large	1.03084	large	0.773624	medium	0.514938	medium	-0.0678711	small	-0.158564	small	0.168253	small	0.0773196	small	0.107018	small	-0.17385	small	-0.417225	small	-0.338358	small	-0.0804993	small	-0.0586767	small	-0.354714	small	-0.620186	medium	-0.235848	small	-0.0251024	small	-0.242314	small
396	1218.64	1	10781.5	0.622116	medium	0.389431	small	0.531653	medium	0.836873	large	0.854961	large	0.7694	medium	0.535585	medium	0.451193	small	0.239413	small	-0.0168114	small	0.130237	small	0.691692	medium	0.188707	small	-0.0605967	small	-0.201151	small	-0.141464	small	0.558603	medium	0.0685416	small	-0.185917	small	-0.359989	small	-0.956579	large	0.643549	medium	-0.698184	medium
397	1221.67	1	12593.3	0.135235	small	0.365004	small	0.2274	small	0.304211	small	0.853809	large	0.271235	small	0.171112	small	0.245595	small	0.272363	small	0.0904946	small	0.164238	small	0.731609	medium	0.134708	small	0.031924	small	0.101961	small	-0.0833626	small	0.553913	medium	-0.0303852	small	-0.138744	small	-0.0759237	small	-0.871578	large	0.651117	medium	-0.716857	medium
398	1222.67	5	520.295	0.79063	medium	0.652433	medium	0.620551	medium	1.16114	large	0.852172	large	0.848074	large	0.786299	medium	0.42986	small	0.0123532	small	-0.0756309	small	0.367125	small	0.118101	small	0.0884161	small	0.0131394	small	-0.332316	small	-0.45596	small	-0.235454	small	-0.26871	small	-0.345895	small	-0.671781	medium	-0.191755	small	0.0306521	small	-0.10361	small
399	1223.68	3	3510.91	-0.280123	small	0.0770265	small	-0.00596217	small	-0.0749776	small	0.363386	small	-0.0133436	small	-0.0909195	small	0.0793577	small	0.362065	small	0.283439	small	0.20577	small	0.632373	medium	0.261662	small	0.201849	small	0.363228	small	0.0709025	small	0.440525	small	0.0600435	small	-0.0142049	small	0.159169	small	-0.378493	small	0.370847	small	-0.470259	small
400	1224.61	2	4786.35	-0.154815	small	0.187885	small	0.136997	small	0.152635	small	0.340086	small	0.151882	small	0.0359159	small	0.21359	small	0.348185	small	0.295803	small	0.296371	small	0.484622	small	0.296536	small	0.194277	small	0.36472	small	-0.0185403	small	0.19126	small	0.0028499	small	-0.125908	small	0.059816	small	-0.207885	small	0.180334	small	-0.319761	small
401	1226.25	2	7689.93	-0.056709	small	0.171943	small	0.154237	small	0.17624	small	0.21546	small	0.226287	small	0.0498077	small	0.180267	small	0.228232	small	0.208466	small	0.21778	small	0.262748	small	0.267179	small	0.105384	small	0.22905	small	-0.0237802	small	0.0346646	small	0.0559039	small	-0.13624	small	-0.000879715	small	-0.057678	small	-0.0267852	small	-0.174223	small
402	1228.69	4	1244.93	0.545882	medium	0.493783	small	0.48193	small	0.875811	large	0.528296	medium	0.771914	medium	0.533226	medium	0.249177	small	-0.0287067	small	-0.0601287	small	0.194153	small	-0.0238955	small	0.19445	small	-0.0677304	small	-0.322687	small	-0.277136	small	-0.224523	small	0.00725491	small	-0.298946	small	-0.605541	medium	-0.0348293	small	-0.221838	small	-0.04293	small
403	1229.69	4	962.004	0.585027	medium	0.362017	small	0.344023	small	0.602047	medium	0.334557	small	0.608234	medium	0.360025	small	0.0764276	small	-0.224167	small	-0.239157	small	0.0110311	small	-0.263815	small	0.057637	small	-0.260458	small	-0.543346	medium	-0.251036	small	-0.279678	small	0.0458212	small	-0.282746	small	-0.578293	medium	0.0196614	small	-0.304361	small	0.0141317	small
404	1230.69	4	1093.24	0.718375	medium	0.482696	small	0.462037	small	0.753987	medium	0.685741	medium	0.811273	large	0.550059	medium	0.1228	small	-0.0832435	small	-0.217081	small	-0.0587474	small	0.157096	small	0.123732	small	-0.223044	small	-0.60904	medium	-0.1618	small	0.184859	small	0.17695	small	-0.180054	small	-0.642547	medium	-0.364951	small	0.0560271	small	-0.322276	small
405	1231.67	4	1158.15	0.992147	large	0.591148	medium	0.569956	medium	1.06519	large	0.826822	large	0.960869	large	0.740124	medium	0.279083	small	-0.220571	small	-0.320801	small	-0.139495	small	-0.0208992	small	0.0546053	small	-0.36546	small	-0.731129	medium	-0.180462	small	0.0999403	small	0.17843	small	-0.245447	small	-0.703502	medium	-0.277471	small	-0.0697434	small	-0.297072	small
406	1232.68	4	926.109	1.04563	large	0.694257	medium	0.678137	medium	1.38648	very large	0.886216	large	1.0538	large	0.883447	large	0.43872	small	-0.141378	small	-0.22197	small	0.115679	small	-0.0310583	small	0.103133	small	-0.214528	small	-0.621464	medium	-0.342793	small	-0.133404	small	-0.00310717	small	-0.349998	small	-0.818084	large	-0.178952	small	-0.125011	small	-0.162021	small
407	1235.67	1	19233.3	0.645464	medium	0.578113	medium	0.555786	medium	1.18783	large	0.788389	medium	0.839828	large	0.672861	medium	0.415986	small	0.0761163	small	-0.00402174	small	0.490981	small	0.141322	small	0.136568	small	0.102062	small	-0.282823	small	-0.547986	medium	-0.360625	small	-0.383352	small	-0.3504	small	-0.800659	large	-0.146584	small	0.011442	small	-0.0265136	small
408	1237.68	2	5921.49	0.642386	medium	0.63787	medium	0.606907	medium	1.1897	large	0.864299	large	0.901262	large	0.697436	medium	0.454335	small	0.0923474	small	0.00717116	small	0.438467	small	0.195891	small	0.189818	small	0.0604447	small	-0.239323	small	-0.486549	small	-0.255785	small	-0.275887	small	-0.371447	small	-0.729562	medium	-0.199712	small	0.0128776	small	-0.131819	small
409	1238.54	2	7054.49	0.532281	medium	0.458035	small	0.432853	small	0.789293	medium	0.657084	medium	0.62583	medium	0.490536	small	0.258333	small	-0.0137126	small	-0.109484	small	0.308172	small	0.0796508	small	0.055314	small	-0.0719467	small	-0.302048	small	-0.489578	small	-0.261925	small	-0.27344	small	-0.378476	small	-0.57497	medium	-0.200402	small	0.0247048	small	-0.161386	small
410	1241.38	1	9762.22	-0.0583032	small	0.0738443	small	0.019541	small	0.345339	small	0.118604	small	0.0781743	small	-0.0267964	small	0.00449955	small	0.131838	small	0.0826958	small	0.359994	small	0.169929	small	0.13037	small	0.03641	small	0.0660199	small	-0.379396	small	-0.242929	small	-0.265825	small	-0.381176	small	-0.358602	small	-0.106945	small	0.0387484	small	-0.156056	small
411	1241.68	5	539.992	0.600041	medium	0.503333	medium	0.482549	small	1.02215	large	0.552544	medium	0.684194	medium	0.597835	medium	0.269567	small	-0.00776557	small	-0.0710322	small	0.419898	small	-0.00337154	small	0.105362	small	0.00114025	small	-0.325995	small	-0.514581	medium	-0.394173	small	-0.303124	small	-0.414898	small	-0.729846	medium	-0.0651421	small	-0.102125	small	0.00441337	small
412	1242.69	4	743.675	0.811825	large	0.617082	medium	0.634599	medium	1.22236	very large	0.645652	medium	1.041	large	0.74385	medium	0.413748	small	-0.116928	small	-0.123484	small	0.223248	small	-0.236996	small	0.220505	small	-0.194299	small	-0.447915	small	-0.37802	small	-0.503478	medium	-5.44986e-05	small	-0.468661	small	-0.748813	medium	0.11376	small	-0.468469	small	0.0551819	small
413	1243.69	4	896.072	0.926344	large	0.741193	medium	0.755472	medium	1.6046	very large	0.818136	large	1.13746	large	1.01933	large	0.512614	medium	-0.00726925	small	-0.0460574	small	0.499881	small	-0.101684	small	0.243099	small	-0.00521811	small	-0.404714	small	-0.578617	medium	-0.607008	medium	-0.236772	small	-0.543817	medium	-0.934286	large	0.0544505	small	-0.341662	small	0.103393	small
414	1244.69	4	797.183	0.954675	large	0.845198	large	0.863259	large	1.90558	very large	0.898343	large	1.20316	very large	1.27461	very large	0.592847	medium	0.0871641	small	0.0599227	small	0.651146	medium	-0.0374232	small	0.263447	small	0.256428	small	-0.350441	small	-0.594474	medium	-0.686054	medium	-0.353185	small	-0.403216	small	-1.05323	large	0.0959983	small	-0.298296	small	0.293074	small
415	1245.68	4	872.738	1.01543	large	0.865879	large	0.8709	large	1.95585	very large	0.948687	large	1.20125	very large	1.33897	very large	0.567259	medium	0.0500403	small	0.0178391	small	0.56636	medium	-0.0408056	small	0.220081	small	0.256891	small	-0.45478	small	-0.540178	medium	-0.602466	medium	-0.303911	small	-0.309917	small	-1.12519	large	0.0575142	small	-0.257338	small	0.296018	small
416	1246.67	4	660.111	0.946359	large	0.858661	large	0.829215	large	1.93357	very large	1.02664	large	1.18165	large	1.1982	large	0.517945	medium	0.0743695	small	-0.00314054	small	0.614851	medium	0.103585	small	0.250386	small	0.160826	small	-0.453732	small	-0.627483	medium	-0.48588	small	-0.319778	small	-0.480553	small	-1.21116	very large	-0.108644	small	-0.145727	small	0.0484838	small
417	1247.68	2	8570.85	0.282504	small	0.653688	medium	0.576408	medium	1.00705	large	0.788529	medium	0.70225	medium	0.708692	medium	0.346202	small	0.341546	small	0.257014	small	0.609547	medium	0.446847	small	0.368048	small	0.356861	small	0.025948	small	-0.426046	small	-0.180109	small	-0.258987	small	-0.325418	small	-0.709758	medium	-0.231152	small	0.0793341	small	-0.12081	small
418	1249.68	4	677.814	0.715864	medium	0.689898	medium	0.628139	medium	1.29114	very large	0.940337	large	0.911646	large	0.741649	medium	0.425005	small	0.0668645	small	-0.0392091	small	0.417165	small	0.227799	small	0.190971	small	-0.00557252	small	-0.318806	small	-0.481858	small	-0.174649	small	-0.212394	small	-0.441541	small	-0.807642	large	-0.278564	small	0.03688	small	-0.239641	small
419	1251.67	1	10508.9	0.470806	small	0.548655	medium	0.50104	medium	0.710256	medium	0.738327	medium	0.762971	medium	0.435909	small	0.396898	small	0.0888608	small	0.0363359	small	0.165451	small	0.206617	small	0.267826	small	-0.0580873	small	-0.115524	small	-0.138835	small	0.0337438	small	0.107182	small	-0.240534	small	-0.318532	small	-0.174899	small	-0.0827611	small	-0.281646	small
420	1254.68	1	10512.5	0.540267	medium	0.433829	small	0.40928	small	1.16117	large	0.506652	medium	0.641477	medium	0.435307	small	0.377984	small	0.00133801	small	-0.013378	small	0.375168	small	-0.102213	small	0.229292	small	-0.142572	small	-0.247152	small	-0.360724	small	-0.552526	medium	-0.0514096	small	-0.578026	medium	-0.771435	medium	0.0734747	small	-0.318111	small	-0.0497025	small
421	1255.68	4	1385.13	1.02413	large	0.564862	medium	0.550038	medium	1.75456	very large	0.71373	medium	0.78558	medium	0.970012	large	0.540248	medium	-0.15397	small	-0.151436	small	0.35272	small	-0.397653	small	0.142088	small	-0.222126	small	-0.617021	medium	-0.464845	small	-0.835288	large	-0.103534	small	-0.642446	medium	-1.14297	large	0.160989	small	-0.411253	small	0.204919	small
422	1256.69	1	16786.8	0.47125	small	0.372673	small	0.350877	small	0.843766	large	0.419833	small	0.58739	medium	0.31856	small	0.25427	small	-0.0241915	small	-0.0402039	small	0.246746	small	-0.0785021	small	0.200639	small	-0.162642	small	-0.250578	small	-0.272587	small	-0.354847	small	0.00271929	small	-0.441939	small	-0.576769	medium	0.029214	small	-0.271159	small	-0.0917808	small
423	1258.69	4	874.543	0.743862	medium	0.558546	medium	0.530452	medium	1.01651	large	0.700135	medium	0.850655	large	0.594406	medium	0.322347	small	-0.0554626	small	-0.113031	small	0.213124	small	0.00251029	small	0.167043	small	-0.135391	small	-0.412544	small	-0.323409	small	-0.198231	small	-0.0335882	small	-0.343401	small	-0.636135	medium	-0.112805	small	-0.158287	small	-0.131008	small
424	1259.69	3	1559.4	0.474415	small	0.403423	small	0.384201	small	0.62318	medium	0.475325	small	0.662963	medium	0.31195	small	0.247376	small	-0.0335122	small	-0.0624328	small	0.110107	small	-0.00546624	small	0.195973	small	-0.164237	small	-0.244623	small	-0.176582	small	-0.117981	small	0.0855725	small	-0.280714	small	-0.376299	small	-0.0574117	small	-0.204122	small	-0.16126	small
425	1260.68	3	1699.59	0.658547	medium	0.584377	medium	0.562404	medium	1.05405	large	0.710409	medium	0.808336	large	0.658059	medium	0.418627	small	0.0276763	small	-0.015639	small	0.28365	small	0.0595388	small	0.198703	small	-0.0123437	small	-0.264101	small	-0.299258	small	-0.219756	small	-0.0600558	small	-0.30108	small	-0.588875	medium	-0.074278	small	-0.142565	small	-0.0724499	small
426	1261.68	4	1050.45	0.924555	large	0.640459	medium	0.611961	medium	1.21289	very large	0.836262	large	0.933404	large	0.752884	medium	0.435803	small	-0.178771	small	-0.225951	small	0.0558677	small	-0.124973	small	0.0601348	small	-0.241658	small	-0.532087	medium	-0.292592	small	-0.191514	small	0.00787686	small	-0.325757	small	-0.676285	medium	-0.101508	small	-0.180942	small	-0.119542	small
427	1262.71	4	1273.95	1.13684	large	0.778627	medium	0.803067	large	1.55125	very large	0.986583	large	1.19883	large	1.13009	large	0.64097	medium	-0.115841	small	-0.137225	small	0.244081	small	-0.210881	small	0.102435	small	-0.0378361	small	-0.508127	medium	-0.396476	small	-0.465951	small	-0.137096	small	-0.284325	small	-0.766674	medium	0.0645437	small	-0.310004	small	0.174959	small
428	1263.72	4	820.679	0.930582	large	0.725364	medium	0.741459	medium	1.4375	very large	0.854836	large	1.09633	large	0.992454	large	0.547998	medium	-0.0342797	small	-0.0607466	small	0.352519	small	-0.120759	small	0.149232	small	0.0368758	small	-0.381979	small	-0.439552	small	-0.492437	small	-0.205345	small	-0.320868	small	-0.754276	medium	0.0564651	small	-0.275801	small	0.160944	small
429	1264.7	2	8943.51	-0.0238039	small	0.263161	small	0.246375	small	0.340016	small	0.289029	small	0.306112	small	0.214659	small	0.220422	small	0.279177	small	0.260115	small	0.324295	small	0.28987	small	0.303318	small	0.221093	small	0.227127	small	-0.0990234	small	-0.059588	small	-0.0250924	small	-0.136933	small	-0.134363	small	-0.0399363	small	-0.0314659	small	-0.078519	small
430	1266.72	3	2444.81	-0.00442967	small	-0.213344	small	-0.191639	small	-0.282927	small	-0.247641	small	-0.148432	small	-0.244562	small	-0.178665	small	-0.203055	small	-0.18025	small	-0.252157	small	-0.22696	small	-0.133869	small	-0.223685	small	-0.162525	small	0.0996978	small	0.0368498	small	0.129148	small	0.0507049	small	0.114063	small	0.061644	small	-0.0948841	small	0.0114669	small
431	1267.72	2	5551.92	0.379292	small	0.315721	small	0.264081	small	0.726645	medium	0.435066	small	0.422268	small	0.320567	small	0.109955	small	-0.00336533	small	-0.083036	small	0.327984	small	0.0788319	small	0.0397278	small	-0.0320059	small	-0.260513	small	-0.433315	small	-0.234723	small	-0.289244	small	-0.335455	small	-0.580295	medium	-0.161109	small	0.041469	small	-0.10488	small
432	1268.72	2	7949.03	0.485494	small	0.575988	medium	0.528781	medium	1.0058	large	0.757017	medium	0.688384	medium	0.586806	medium	0.421605	small	0.130338	small	0.0456246	small	0.427461	small	0.252169	small	0.163661	small	0.0730993	small	-0.101216	small	-0.435008	small	-0.177577	small	-0.281513	small	-0.371938	small	-0.580169	medium	-0.22775	small	0.0974195	small	-0.187321	small
433	1270.35	5	98.8113	-0.615638	medium	-0.415914	small	-0.410127	small	-0.67656	medium	-0.35915	small	-0.532984	medium	-0.578099	medium	-0.164039	small	0.194232	small	0.199461	small	-0.0312517	small	0.253725	small	0.0772829	small	0.0538901	small	0.453989	small	0.234302	small	0.294802	small	0.110342	small	0.0892253	small	0.510088	medium	-0.0562109	small	0.174242	small	-0.207266	small
434	1270.72	3	1519.03	0.686236	medium	0.591401	medium	0.582162	medium	1.1188	large	0.676098	medium	0.756406	medium	0.713594	medium	0.546729	medium	0.0584443	small	0.0345153	small	0.381648	small	0.0184128	small	0.0977987	small	0.0131869	small	0.00468102	small	-0.319487	small	-0.350344	small	-0.268053	small	-0.3747	small	-0.300222	small	0.0175917	small	-0.0772457	small	-0.00592775	small
435	1271.75	1	39480.5	-0.00738434	small	-0.810928	large	-0.655538	medium	-0.562364	medium	-0.857393	large	-0.544275	medium	-0.670085	medium	-0.466499	small	-0.808161	large	-0.646867	medium	-0.529689	medium	-0.841212	large	-0.522879	medium	-0.649595	medium	-0.448141	small	0.0941816	small	-0.522815	medium	0.0938858	small	-0.0761007	small	0.23428	small	0.419822	small	-0.469457	small	0.343576	small
436	1273.7	2	6801.88	0.0726441	small	-0.683449	medium	-0.545555	medium	-0.495791	small	-0.824929	large	-0.445254	small	-0.57879	medium	-0.426153	small	-0.769085	medium	-0.619207	medium	-0.513113	medium	-0.847859	large	-0.487197	small	-0.615701	medium	-0.474688	small	0.0759647	small	-0.474119	small	0.0925723	small	-0.039501	small	0.155436	small	0.419798	small	-0.461625	small	0.404753	small
437	1273.75	4	1147	0.100388	small	-0.528709	medium	-0.415449	small	-0.380335	small	-0.696802	medium	-0.319106	small	-0.436554	small	-0.365662	small	-0.674572	medium	-0.546889	medium	-0.472508	small	-0.820865	large	-0.423975	small	-0.551276	medium	-0.474376	small	0.043408	small	-0.430542	small	0.0958766	small	-0.024939	small	0.050125	small	0.384288	small	-0.462262	small	0.390184	small
438	1273.91	3	1888.86	-0.0676859	small	-0.575885	medium	-0.473556	small	-0.582866	medium	-0.690433	medium	-0.450511	small	-0.527733	medium	-0.341404	small	-0.475283	small	-0.376454	small	-0.464784	small	-0.574011	medium	-0.351509	small	-0.420366	small	-0.246635	small	0.214231	small	-0.061629	small	0.16021	small	0.141415	small	0.344359	small	0.276403	small	-0.229267	small	0.210255	small
439	1274.76	1	31330.6	0.183127	small	0.0948266	small	0.0630252	small	-0.128352	small	0.229517	small	0.261225	small	0.131487	small	-0.332017	small	-0.0151493	small	-0.115128	small	-0.246289	small	0.132672	small	0.0613292	small	-0.0479384	small	-0.41603	small	0.1522	small	0.211291	small	0.31643	small	0.208668	small	-0.567979	medium	-0.241701	small	0.100882	small	-0.156298	small
440	1274.91	3	2124.14	0.209355	small	0.102263	small	0.0822228	small	-0.12412	small	0.226996	small	0.281089	small	0.151938	small	-0.348195	small	-0.0391985	small	-0.121925	small	-0.235376	small	0.1006	small	0.0450611	small	-0.0613682	small	-0.383367	small	0.148951	small	0.206753	small	0.300061	small	0.203219	small	-0.517497	medium	-0.214186	small	0.073398	small	-0.13863	small
441	1275.76	1	21490.7	0.209634	small	0.114117	small	0.0965924	small	-0.0777339	small	0.245394	small	0.294319	small	0.173073	small	-0.308068	small	-0.0137187	small	-0.113185	small	-0.223511	small	0.133519	small	0.0554877	small	-0.0444454	small	-0.389979	small	0.142461	small	0.208908	small	0.302132	small	0.204495	small	-0.625589	medium	-0.244374	small	0.104825	small	-0.157216	small
442	1276.76	3	3761.39	0.280099	small	0.148689	small	0.163251	small	0.107447	small	0.267156	small	0.375107	small	0.264361	small	-0.274845	small	-0.0245895	small	-0.132304	small	-0.186379	small	0.121085	small	0.0396085	small	-0.0579083	small	-0.390922	small	0.0936132	small	0.189142	small	0.262568	small	0.169763	small	-0.754341	medium	-0.242278	small	0.10124	small	-0.15385	small
443	1278.68	1	10017.9	0.297519	small	0.225691	small	0.264766	small	0.37154	small	0.334243	small	0.492306	small	0.363497	small	-0.0638373	small	0.011456	small	-0.0659495	small	-0.0874901	small	0.145332	small	0.107972	small	-0.0123262	small	-0.320327	small	0.0389593	small	0.180458	small	0.229094	small	0.100496	small	-0.607812	medium	-0.240689	small	0.0801259	small	-0.159321	small
444	1279.7	3	2362.07	0.447341	small	0.571057	medium	0.53788	medium	0.977315	large	0.696683	medium	0.780329	medium	0.598662	medium	0.355216	small	0.14182	small	0.0865924	small	0.384973	small	0.201514	small	0.306193	small	0.0745307	small	-0.156376	small	-0.339072	small	-0.195302	small	-0.0597705	small	-0.366508	small	-0.659956	medium	-0.128127	small	-0.122225	small	-0.146312	small
445	1280.29	2	5829.94	-0.0131557	small	0.295944	small	0.238736	small	0.416857	small	0.414328	small	0.361309	small	0.115702	small	0.233979	small	0.303264	small	0.245233	small	0.397147	small	0.405821	small	0.352075	small	0.122973	small	0.2352	small	-0.178443	small	-0.0135572	small	-0.0312363	small	-0.325766	small	-0.202279	small	-0.167985	small	0.0205946	small	-0.315184	small
446	1281.7	3	2195.99	0.11602	small	0.38547	small	0.307367	small	0.602327	medium	0.544232	medium	0.433916	small	0.240256	small	0.249332	small	0.261668	small	0.182922	small	0.455182	small	0.405696	small	0.304024	small	0.112692	small	0.120462	small	-0.306977	small	-0.0795897	small	-0.149089	small	-0.383674	small	-0.383971	small	-0.232329	small	0.0816183	small	-0.314723	small
447	1282.72	3	3005.77	0.050663	small	0.395216	small	0.26071	small	0.372772	small	0.798404	medium	0.333623	small	0.221487	small	0.220192	small	0.342393	small	0.206238	small	0.312843	small	0.729547	medium	0.276959	small	0.165523	small	0.164558	small	-0.114098	small	0.452832	small	-0.0194313	small	-0.170102	small	-0.166008	small	-0.597317	medium	0.462638	small	-0.619956	medium
448	1283.62	4	1021.8	0.992443	large	0.539441	medium	0.530171	medium	1.10077	large	0.776395	medium	0.749334	medium	0.790388	medium	0.445033	small	-0.229198	small	-0.308869	small	-0.229339	small	-0.0461968	small	-0.0848543	small	-0.214579	small	-0.705807	medium	-0.0782616	small	0.150629	small	0.114106	small	0.0153368	small	-0.629343	medium	-0.238368	small	0.035205	small	-0.144005	small
449	1284.69	1	13021.3	0.786892	medium	0.606292	medium	0.592623	medium	1.11287	large	0.906617	large	0.819568	large	0.746602	medium	0.442421	small	0.0209252	small	-0.0911943	small	0.443177	small	0.1365	small	0.13137	small	-0.0435276	small	-0.436416	small	-0.598787	medium	-0.331966	small	-0.29753	small	-0.475976	small	-0.810718	large	-0.227548	small	-0.00718973	small	-0.179392	small
450	1286.72	2	5732.83	1.19919	large	0.533717	medium	0.597463	medium	1.11129	large	0.781823	medium	0.889115	large	0.835433	large	0.65643	medium	-0.150553	small	-0.231648	small	0.360846	small	-0.298601	small	0.0202769	small	-0.160901	small	-0.738419	medium	-0.611709	medium	-0.550851	medium	-0.302331	small	-0.445966	small	-0.812528	large	0.0395789	small	-0.262907	small	0.114294	small
451	1287.73	1	13233.4	1.3263	very large	0.706853	medium	0.710292	medium	1.45769	very large	1.09065	large	1.05096	large	1.05274	large	0.766057	medium	-0.0805631	small	-0.145	small	0.352646	small	-0.098447	small	0.185261	small	-0.159692	small	-0.688235	medium	-0.481821	small	-0.419001	small	-0.121648	small	-0.464958	small	-0.912337	large	-0.0572828	small	-0.255392	small	-0.05753	small
452	1288.73	3	2103.27	1.31483	very large	0.727058	medium	0.701949	medium	1.62491	very large	1.08423	large	1.02967	large	1.106	large	0.663908	medium	-0.0770941	small	-0.140865	small	0.287146	small	-0.0334825	small	0.19595	small	-0.172721	small	-0.67733	medium	-0.390486	small	-0.291488	small	-0.0337182	small	-0.438133	small	-0.928889	large	-0.107045	small	-0.212658	small	-0.123801	small
453	1289.67	3	2734.27	0.724674	medium	0.638596	medium	0.59348	medium	1.01693	large	0.883532	large	0.917508	large	0.598815	medium	0.482332	small	0.0450023	small	-0.0022768	small	0.234142	small	0.12689	small	0.325021	small	-0.143752	small	-0.294489	small	-0.219339	small	-0.119022	small	0.115608	small	-0.386096	small	-0.56371	medium	-0.116121	small	-0.230498	small	-0.279121	small
454	1292.72	2	9285	0.866491	large	0.647749	medium	0.653662	medium	1.09413	large	0.834927	large	1.09541	large	0.831412	large	0.535002	medium	-0.275339	small	-0.223463	small	-0.221178	small	-0.35019	small	0.188809	small	-0.36962	small	-0.572727	medium	0.0238446	small	-0.148954	small	0.41398	small	-0.186206	small	-0.555817	medium	0.133779	small	-0.573242	medium	-0.0325591	small
455	1294.09	1	11596.5	0.321596	small	0.281693	small	0.27738	small	0.218844	small	0.338559	small	0.521603	medium	0.139978	small	0.176355	small	-0.0425219	small	-0.0337661	small	-0.122929	small	-0.0324515	small	0.214083	small	-0.207195	small	-0.175926	small	0.0902218	small	0.119401	small	0.311378	small	-0.0899549	small	-0.0505181	small	-0.00446537	small	-0.265736	small	-0.21262	small
456	1295.71	4	1205.85	0.407189	small	0.420008	small	0.391788	small	0.852407	large	0.431911	small	0.603375	medium	0.392666	small	0.249875	small	0.039397	small	0.00996287	small	0.374276	small	-0.00151536	small	0.210523	small	-0.0293724	small	-0.168906	small	-0.369237	small	-0.408697	small	-0.131704	small	-0.424131	small	-0.583366	medium	0.0117186	small	-0.223254	small	-0.0297893	small
457	1297.36	2	4211.55	0.0877756	small	0.255346	small	0.22535	small	0.487318	small	0.368511	small	0.381126	small	0.186146	small	0.119346	small	0.182793	small	0.133809	small	0.359403	small	0.29036	small	0.278932	small	0.0876258	small	0.0217912	small	-0.228696	small	0.0628835	small	-0.0449676	small	-0.297877	small	-0.393793	small	-0.252088	small	0.0975888	small	-0.242176	small
458	1297.69	3	2977.92	0.742348	medium	0.527787	medium	0.545365	medium	1.12653	large	0.674403	medium	0.849474	large	0.698291	medium	0.315939	small	0.00877791	small	-0.101106	small	0.427196	small	0.10146	small	0.131803	small	-0.0251851	small	-0.46525	small	-0.590154	medium	-0.274919	small	-0.299598	small	-0.440076	small	-0.846621	large	-0.202341	small	-0.0112053	small	-0.120701	small
459	1298.7	2	4414.44	0.536797	medium	0.552381	medium	0.506763	medium	1.09283	large	0.789428	medium	0.757223	medium	0.541984	medium	0.355317	small	0.111471	small	-0.000904773	small	0.529249	medium	0.257632	small	0.207158	small	-0.00696793	small	-0.220043	small	-0.617427	medium	-0.286037	small	-0.338405	small	-0.542124	medium	-0.773047	medium	-0.276601	small	0.0549061	small	-0.267775	small
460	1299.73	2	6361.7	1.13601	large	0.74629	medium	0.682261	medium	1.82685	very large	1.21158	very large	0.931692	large	1.2148	very large	0.708011	medium	0.060768	small	-0.0198611	small	0.311158	small	0.242179	small	0.259828	small	-0.0954964	small	-0.382159	small	-0.264449	small	-0.0354158	small	0.0432591	small	-0.44918	small	-0.719742	medium	-0.229734	small	-0.0736662	small	-0.338587	small
461	1300.71	3	3841.67	1.11686	large	0.729424	medium	0.678468	medium	1.68888	very large	1.13182	large	0.922794	large	1.13004	large	0.660668	medium	0.0546292	small	-0.0333221	small	0.238711	small	0.261545	small	0.228241	small	-0.0732574	small	-0.380959	small	-0.222206	small	0.0578485	small	0.0546877	small	-0.330538	small	-0.63373	medium	-0.271747	small	-0.00814141	small	-0.327647	small
462	1301.72	2	5907.73	1.0341	large	0.680006	medium	0.631641	medium	1.27207	very large	1.06153	large	0.898596	large	0.891455	large	0.572945	medium	-0.0117958	small	-0.106263	small	0.087505	small	0.213178	small	0.178388	small	-0.186311	small	-0.449785	small	-0.179225	small	0.125631	small	0.0991364	small	-0.279149	small	-0.551422	medium	-0.304367	small	0.00798013	small	-0.374015	small
463	1302.72	3	1720.3	1.1507	large	0.669822	medium	0.647483	medium	1.32644	very large	0.921917	large	0.993998	large	0.881173	large	0.462074	small	-0.186196	small	-0.255763	small	0.0910111	small	-0.111879	small	0.0645238	small	-0.286718	small	-0.647692	medium	-0.338239	small	-0.189155	small	-0.0166991	small	-0.369049	small	-0.730787	medium	-0.139673	small	-0.158725	small	-0.153591	small
464	1303.72	2	8511.81	0.759873	medium	0.546396	medium	0.503771	medium	0.980216	large	0.745142	medium	0.792431	medium	0.56815	medium	0.289646	small	-0.115784	small	-0.181321	small	0.190989	small	-0.0591642	small	0.0953173	small	-0.175256	small	-0.534732	medium	-0.38221	small	-0.260376	small	-0.0856158	small	-0.355051	small	-0.753949	medium	-0.128141	small	-0.153871	small	-0.126155	small
465	1304.7	3	1679.4	0.872065	large	0.587053	medium	0.558616	medium	1.08765	large	0.725813	medium	0.908062	large	0.667198	medium	0.267829	small	-0.195429	small	-0.247577	small	0.123942	small	-0.174885	small	0.0707252	small	-0.216119	small	-0.658269	medium	-0.383493	small	-0.30688	small	-0.0493729	small	-0.344232	small	-0.856665	large	-0.0748592	small	-0.240771	small	-0.0462574	small
466	1306.72	1	11569.4	0.785701	medium	0.492384	small	0.468553	small	0.852471	large	0.618615	medium	0.760556	medium	0.545851	medium	0.230083	small	-0.230144	small	-0.277694	small	0.0124988	small	-0.189769	small	-0.000126765	small	-0.277313	small	-0.569515	medium	-0.292331	small	-0.201355	small	-0.0121254	small	-0.292253	small	-0.607095	medium	-0.0855103	small	-0.183912	small	-0.0891588	small
467	1308.73	1	13386.7	0.236166	small	0.141382	small	0.1627	small	0.261031	small	0.0533098	small	0.343744	small	0.0737314	small	0.0840087	small	-0.080353	small	-0.061377	small	0.016377	small	-0.170579	small	0.113164	small	-0.159572	small	-0.150072	small	-0.0776916	small	-0.186748	small	0.0938834	small	-0.179178	small	-0.169499	small	0.107918	small	-0.273424	small	0.0171037	small
468	1310.72	5	555.026	0.673885	medium	0.449454	small	0.460584	small	0.886052	large	0.373432	small	0.703148	medium	0.543532	medium	0.260094	small	-0.145561	small	-0.139442	small	0.155372	small	-0.283677	small	0.0786769	small	-0.122106	small	-0.395978	small	-0.291691	small	-0.443717	small	-0.0642177	small	-0.277029	small	-0.56359	medium	0.129497	small	-0.340431	small	0.160672	small
469	1311.72	4	748.576	1.00418	large	0.661006	medium	0.640345	medium	1.28472	very large	0.918056	large	0.936778	large	0.81593	large	0.455048	small	-0.0788273	small	-0.217906	small	0.180907	small	0.139356	small	-0.00227515	small	-0.137767	small	-0.546118	medium	-0.40213	small	-0.0150558	small	-0.170967	small	-0.3064	small	-0.742997	medium	-0.346729	small	0.135983	small	-0.249166	small
470	1314.72	1	11175.6	0.583158	medium	0.395565	small	0.45645	small	0.822288	large	0.489899	small	0.711229	medium	0.59406	medium	0.285526	small	-0.139385	small	-0.228011	small	-0.152715	small	0.0185866	small	0.0114388	small	-0.207393	small	-0.442175	small	-0.0494879	small	0.140989	small	0.195451	small	-0.0613528	small	-0.577344	medium	-0.224975	small	0.00987362	small	-0.191276	small
471	1314.91	2	8832.79	0.346975	small	0.239958	small	0.254861	small	0.297733	small	0.350552	small	0.472138	small	0.277034	small	0.0566096	small	-0.110702	small	-0.172047	small	-0.177163	small	0.0287087	small	0.02267	small	-0.179262	small	-0.310937	small	0.0702222	small	0.189798	small	0.255226	small	0.0362414	small	-0.2908	small	-0.202102	small	0.0103085	small	-0.197457	small
472	1315.72	3	2040.47	0.458374	small	0.237358	small	0.269655	small	0.534083	medium	0.313433	small	0.518012	medium	0.352852	small	-0.048772	small	-0.188785	small	-0.269408	small	-0.203092	small	-0.0446104	small	-0.0307187	small	-0.247031	small	-0.451724	small	-0.0165894	small	0.118128	small	0.213768	small	-0.0387319	small	-0.730638	medium	-0.172443	small	-0.0212263	small	-0.151211	small
473	1316.72	3	3292.47	0.406717	small	0.331092	small	0.324462	small	0.594565	medium	0.44733	small	0.592409	medium	0.340897	small	0.0966222	small	-0.0704346	small	-0.139488	small	-0.0354357	small	0.0609113	small	0.0955295	small	-0.166297	small	-0.33847	small	-0.115166	small	0.0965041	small	0.152829	small	-0.191319	small	-0.519545	medium	-0.212616	small	-0.02502	small	-0.223595	small
474	1317.72	4	1049.65	0.832502	large	0.51856	medium	0.485633	small	1.05762	large	0.706732	medium	0.832975	large	0.557308	medium	0.235462	small	-0.148698	small	-0.262348	small	0.0710305	small	0.0262839	small	0.0684064	small	-0.320557	small	-0.593035	medium	-0.342187	small	-0.0328188	small	0.00283344	small	-0.426852	small	-0.742943	medium	-0.268181	small	-0.0351455	small	-0.292994	small
475	1320.72	1	10073.1	0.702462	medium	0.548252	medium	0.500619	medium	1.04277	large	0.693501	medium	0.867243	large	0.49441	small	0.243725	small	-0.103936	small	-0.166187	small	0.259316	small	-0.0742184	small	0.172525	small	-0.20048	small	-0.536997	medium	-0.452306	small	-0.364488	small	-0.0822577	small	-0.462839	small	-0.902049	large	-0.0988148	small	-0.257514	small	-0.143645	small
476	1321.72	1	11857.3	0.586702	medium	0.456458	small	0.414833	small	0.896353	large	0.543793	medium	0.735617	medium	0.381635	small	0.18517	small	-0.088943	small	-0.131755	small	0.266527	small	-0.111673	small	0.183277	small	-0.18317	small	-0.479466	small	-0.413845	small	-0.419498	small	-0.0699454	small	-0.439023	small	-0.835554	large	-0.0328758	small	-0.302118	small	-0.0948723	small
477	1322.72	3	3452.54	0.629689	medium	0.493846	small	0.461744	small	0.951771	large	0.558767	medium	0.778938	medium	0.457747	small	0.23149	small	-0.0801778	small	-0.11454	small	0.270383	small	-0.122848	small	0.199723	small	-0.160613	small	-0.469917	small	-0.393793	small	-0.425519	small	-0.0512363	small	-0.427335	small	-0.82508	large	-0.00300816	small	-0.322788	small	-0.0520992	small
478	1322.81	4	1253.19	0.553573	medium	0.458043	small	0.430695	small	0.88675	large	0.490487	small	0.748323	medium	0.40302	small	0.208505	small	-0.0543123	small	-0.0838707	small	0.274739	small	-0.098465	small	0.226717	small	-0.151909	small	-0.392023	small	-0.367717	small	-0.402592	small	-0.0292757	small	-0.434564	small	-0.744486	medium	0.00792165	small	-0.329241	small	-0.0628206	small
479	1323.67	2	5306.45	0.762016	medium	0.412181	small	0.402462	small	1.30218	very large	0.516794	medium	0.570082	medium	0.824888	large	0.46285	small	-0.0603394	small	-0.0573598	small	0.41149	small	-0.322631	small	0.171677	small	-0.149915	small	-0.47275	small	-0.401272	small	-0.773448	medium	-0.0914455	small	-0.620776	medium	-0.966766	large	0.162426	small	-0.350956	small	0.223163	small
480	1323.8	5	183.801	0.878788	large	0.483462	small	0.472979	small	1.41462	very large	0.640819	medium	0.638366	medium	0.948144	large	0.521179	medium	-0.0676136	small	-0.0710022	small	0.438924	small	-0.32244	small	0.161319	small	-0.109214	small	-0.520783	medium	-0.450089	small	-0.785819	medium	-0.130721	small	-0.588704	medium	-1.01063	large	0.156885	small	-0.350319	small	0.250994	small
481	1324.7	2	4929.51	0.913459	large	0.470278	small	0.477623	small	1.20616	very large	0.527431	medium	0.700578	medium	0.778752	medium	0.41964	small	-0.160902	small	-0.154068	small	0.267643	small	-0.426323	small	0.133049	small	-0.262771	small	-0.590241	medium	-0.397686	small	-0.682274	medium	-0.0676785	small	-0.535049	medium	-0.856547	large	0.175521	small	-0.41108	small	0.197345	small
482	1325.63	3	3828.89	0.902774	large	0.587325	medium	0.614172	medium	1.24642	very large	0.6145	medium	0.935701	large	0.803128	large	0.462124	small	-0.172779	small	-0.159186	small	0.199467	small	-0.38816	small	0.131801	small	-0.17533	small	-0.509828	medium	-0.37342	small	-0.629422	medium	-0.0542034	small	-0.39008	small	-0.76042	medium	0.198025	small	-0.485323	small	0.226552	small
483	1327.76	2	8984.09	0.829323	large	0.698189	medium	0.698244	medium	1.25415	very large	0.833334	large	1.04239	large	0.85254	large	0.531962	medium	-0.0427194	small	-0.0544825	small	0.245142	small	-0.12781	small	0.222869	small	-0.0605132	small	-0.366157	small	-0.321098	small	-0.422477	small	-0.015805	small	-0.330698	small	-0.677212	medium	0.0678875	small	-0.367956	small	0.0705575	small
484	1330.73	1	13801.4	0.402017	small	0.537424	medium	0.515504	medium	0.703753	medium	0.616809	medium	0.6937	medium	0.540365	medium	0.394389	small	0.141488	small	0.117947	small	0.239307	small	0.168564	small	0.284915	small	0.0994218	small	-0.0427933	small	-0.129046	small	-0.0881871	small	0.0589684	small	-0.158694	small	-0.319264	small	-0.046616	small	-0.144191	small	-0.0735519	small
485	1332.73	4	1033.23	0.919668	large	0.558487	medium	0.566673	medium	1.03767	large	0.555116	medium	0.813244	large	0.724536	medium	0.373	small	-0.26287	small	-0.26005	small	0.00502522	small	-0.363354	small	-0.0419443	small	-0.219086	small	-0.53064	medium	-0.267119	small	-0.382041	small	-0.0454856	small	-0.230452	small	-0.564945	medium	0.0942222	small	-0.298438	small	0.151314	small
486	1334.73	1	14123.7	0.331054	small	0.424641	small	0.405907	small	0.692391	medium	0.450143	small	0.489896	small	0.45819	small	0.327852	small	0.115508	small	0.0918843	small	0.336751	small	0.107591	small	0.174679	small	0.118989	small	-0.0177746	small	-0.248243	small	-0.241709	small	-0.138031	small	-0.223855	small	-0.376545	small	-0.0110711	small	-0.0793419	small	0.0132831	small
487	1335.73	4	664.32	0.908415	large	0.680005	medium	0.676868	medium	1.35737	very large	0.813457	large	0.932628	large	0.917321	large	0.497103	small	-0.0105803	small	-0.0575157	small	0.410652	small	-0.0421346	small	0.123296	small	0.0547556	small	-0.380392	small	-0.466863	small	-0.434309	small	-0.255148	small	-0.340415	small	-0.769956	medium	-0.0169366	small	-0.157998	small	0.0933067	small
488	1336.73	4	1504.85	0.866897	large	0.646968	medium	0.656375	medium	1.14994	large	0.73658	medium	0.964332	large	0.840923	large	0.433445	small	-0.0702827	small	-0.107758	small	0.185311	small	-0.0671327	small	0.142978	small	-0.0518255	small	-0.450576	small	-0.29971	small	-0.239642	small	-0.0360496	small	-0.241924	small	-0.663412	medium	-0.0364906	small	-0.201001	small	0.0192507	small
489	1337.76	2	7655.98	0.87431	large	0.630617	medium	0.642952	medium	1.04612	large	0.580143	medium	0.824837	large	0.918465	large	0.358173	small	-0.162051	small	-0.135232	small	0.119441	small	-0.369296	small	0.02941	small	0.0759605	small	-0.592845	medium	-0.251483	small	-0.521545	medium	-0.078208	small	-0.0401195	small	-0.772158	medium	0.191503	small	-0.363512	small	0.434613	small
490	1338.75	2	4080.71	0.97335	large	0.680992	medium	0.704167	medium	1.23115	very large	0.650197	medium	0.945659	large	1.0222	large	0.424829	small	-0.172753	small	-0.141783	small	0.140582	small	-0.406469	small	0.0492485	small	0.0590555	small	-0.607814	medium	-0.282597	small	-0.591619	medium	-0.0803698	small	-0.0799032	small	-0.817066	large	0.222969	small	-0.425351	small	0.463871	small
491	1339.76	2	8877.56	0.81529	large	0.684209	medium	0.708338	medium	1.18436	large	0.724331	medium	0.970308	large	0.959583	large	0.470581	small	-0.0389818	small	-0.0396136	small	0.300581	small	-0.193556	small	0.17523	small	0.0770469	small	-0.410388	small	-0.370517	small	-0.532342	medium	-0.122955	small	-0.244039	small	-0.74713	medium	0.145363	small	-0.376631	small	0.292723	small
492	1340.72	4	1369.21	1.09057	large	0.699061	medium	0.782074	medium	1.32656	very large	0.856472	large	1.10793	large	1.12876	large	0.585111	medium	-0.0507075	small	-0.0907343	small	0.475595	small	-0.240179	small	0.151149	small	0.0291834	small	-0.512897	medium	-0.630667	medium	-0.661442	medium	-0.324356	small	-0.452295	small	-0.859403	large	0.129967	small	-0.368297	small	0.270415	small
493	1341.72	3	1684.73	1.05032	large	0.486707	small	0.522667	medium	1.05032	large	0.410948	small	0.814398	large	0.701146	medium	0.294062	small	-0.34596	small	-0.343197	small	0.0675794	small	-0.586714	medium	-0.0912235	small	-0.315702	small	-0.663328	medium	-0.39414	small	-0.589289	medium	-0.138558	small	-0.343969	small	-0.6549	medium	0.194906	small	-0.42782	small	0.266724	small
494	1342.73	1	11300.7	0.806944	large	0.344699	small	0.359101	small	0.720508	medium	0.308935	small	0.680204	medium	0.319259	small	0.185075	small	-0.289868	small	-0.293189	small	-0.00553256	small	-0.442163	small	0.0251476	small	-0.444068	small	-0.562876	medium	-0.267956	small	-0.378027	small	0.0258219	small	-0.377706	small	-0.483963	small	0.10634	small	-0.391535	small	0.00289128	small
495	1343.72	3	1878.54	0.673466	medium	-0.0472469	small	-0.00885321	small	0.132312	small	-0.247569	small	0.311077	small	-0.165864	small	-0.216578	small	-0.71871	medium	-0.660121	medium	-0.481966	small	-0.89631	large	-0.297149	small	-0.827601	large	-0.849123	large	-0.130653	small	-0.373777	small	0.165656	small	-0.298139	small	-0.332866	small	0.210424	small	-0.518139	medium	0.0897316	small
496	1344.74	3	2886.05	0.81209	large	0.20296	small	0.214671	small	0.257509	small	0.199382	small	0.493637	small	0.238898	small	-0.0565833	small	-0.522029	medium	-0.517236	medium	-0.491009	small	-0.521197	medium	-0.223565	small	-0.538774	medium	-0.806621	large	-0.00540078	small	-0.0288474	small	0.230877	small	-0.0141188	small	-0.286026	small	0.0239838	small	-0.264264	small	0.0171261	small
497	1345.83	2	7566.24	0.358899	small	0.10466	small	0.107689	small	-0.00583635	small	0.149949	small	0.266171	small	0.0407895	small	0.0200683	small	-0.214009	small	-0.216178	small	-0.328607	small	-0.177463	small	-0.0473543	small	-0.302747	small	-0.328152	small	0.106687	small	0.138212	small	0.233377	small	0.0426921	small	0.0241138	small	-0.0357035	small	-0.11278	small	-0.10618	small
498	1347.76	3	1624.13	0.805808	large	0.406651	small	0.412375	small	0.697632	medium	0.411464	small	0.623852	medium	0.503135	medium	0.242948	small	-0.285028	small	-0.288972	small	-0.105483	small	-0.347878	small	-0.100508	small	-0.273727	small	-0.50651	medium	-0.176496	small	-0.228046	small	0.00181019	small	-0.155866	small	-0.383006	small	0.0478619	small	-0.220513	small	0.0759711	small
499	1349.75	1	9799.18	0.979833	large	0.652694	medium	0.693834	medium	1.22721	very large	0.762138	medium	0.877247	large	1.01938	large	0.647107	medium	-0.00590335	small	0.00719358	small	0.322551	small	-0.208138	small	-0.0960287	small	0.27054	small	-0.209845	small	-0.302699	small	-0.504188	medium	-0.399509	small	-0.0347226	small	-0.48161	small	0.177614	small	-0.110333	small	0.437752	small
500	1349.78	4	1260.83	1.21167	very large	0.721465	medium	0.76887	medium	1.45906	very large	0.951488	large	1.1678	large	1.15224	large	0.734807	medium	0.0159949	small	0.0327806	small	0.417918	small	-0.243932	small	-0.134063	small	0.351109	small	-0.212643	small	-0.356363	small	-0.619624	medium	-0.532753	medium	-0.0315512	small	-0.54942	medium	0.216524	small	-0.118924	small	0.528818	medium
501	1350.75	1	9889.74	0.948648	large	0.671572	medium	0.714732	medium	1.256	very large	0.826144	large	0.932415	large	1.05908	large	0.689914	medium	0.072386	small	0.0918197	small	0.409684	small	-0.144233	small	-0.0634396	small	0.378063	small	-0.0974272	small	-0.298052	small	-0.539644	medium	-0.46701	small	-0.00769392	small	-0.453804	small	0.202974	small	-0.0836419	small	0.491418	small
502	1351.75	4	1058.7	1.08771	large	0.710703	medium	0.753594	medium	1.38256	very large	0.784094	medium	1.00955	large	1.08788	large	0.639327	medium	-0.0444136	small	-0.0337652	small	0.303417	small	-0.23736	small	-0.00222293	small	0.200971	small	-0.337542	small	-0.320367	small	-0.509954	medium	-0.287184	small	-0.081132	small	-0.592363	medium	0.17109	small	-0.222669	small	0.399868	small
503	1352.74	2	4650.15	0.733897	medium	0.674948	medium	0.729689	medium	1.0269	large	0.768772	medium	0.941275	large	0.915926	large	0.56631	medium	0.0688563	small	0.0509674	small	0.382817	small	-0.0147499	small	0.203025	small	0.149601	small	-0.208715	small	-0.403478	small	-0.41532	small	-0.213281	small	-0.269207	small	-0.570848	medium	0.0669439	small	-0.22877	small	0.173537	small
504	1353.75	4	817.96	1.02087	large	0.700647	medium	0.74808	medium	1.2477	very large	0.804907	large	1.04784	large	1.02498	large	0.531094	medium	-0.0899766	small	-0.124312	small	0.324748	small	-0.204015	small	0.0790066	small	0.000469103	small	-0.476978	small	-0.477927	small	-0.499799	small	-0.243118	small	-0.323258	small	-0.733005	medium	0.0726508	small	-0.273801	small	0.204583	small
505	1354.36	2	8337.53	0.414491	small	0.637435	medium	0.654885	medium	0.916438	large	0.624052	medium	0.648022	medium	0.875405	large	0.54149	medium	0.241888	small	0.24349	small	0.466246	small	0.161004	small	0.202401	small	0.434632	small	0.0839741	small	-0.273916	small	-0.363112	small	-0.294727	small	-0.0589504	small	-0.435689	small	0.0954673	small	-0.0537563	small	0.311736	small
506	1357.74	1	11489.2	0.665647	medium	0.581209	medium	0.588458	medium	1.01351	large	0.659392	medium	0.68719	medium	0.812998	large	0.487405	small	0.0339798	small	0.0200463	small	0.334489	small	-0.0507374	small	-0.00383174	small	0.214965	small	-0.177897	small	-0.327213	small	-0.403977	small	-0.345161	small	-0.105638	small	-0.506142	medium	0.0669123	small	-0.0482282	small	0.269868	small
507	1358.74	4	886.927	1.1885	large	0.726192	medium	0.748059	medium	1.4172	very large	0.867807	large	1.08608	large	1.02779	large	0.553141	medium	-0.204182	small	-0.24211	small	0.18734	small	-0.278407	small	-0.0493488	small	-0.0707569	small	-0.66135	medium	-0.433819	small	-0.445603	small	-0.224619	small	-0.240958	small	-0.833001	large	0.03096	small	-0.220055	small	0.193718	small
508	1359.74	2	6385.12	0.990432	large	0.278864	small	0.293811	small	0.457822	small	0.231459	small	0.622717	medium	0.275705	small	0.0171345	small	-0.703634	medium	-0.643802	medium	-0.51677	medium	-0.770471	medium	-0.260853	small	-0.717176	medium	-0.930103	large	-0.0689946	small	-0.218667	small	0.226522	small	-0.165909	small	-0.421879	small	0.114212	small	-0.430573	small	0.0479221	small
509	1360.72	4	814.165	1.18959	large	0.569765	medium	0.569619	medium	1.03326	large	0.691974	medium	0.962406	large	0.756503	medium	0.288081	small	-0.490329	small	-0.464502	small	-0.346202	small	-0.540407	medium	-0.0867371	small	-0.484781	small	-0.89145	large	-0.108509	small	-0.190499	small	0.223658	small	-0.131035	small	-0.622208	medium	0.0547925	small	-0.39897	small	0.0571735	small
510	1361.71	1	92683.9	0.203762	small	-0.752233	medium	-0.595015	medium	-0.528756	medium	-0.789069	medium	-0.4685	small	-0.604415	medium	-0.432265	small	-0.901784	large	-0.730732	medium	-0.523988	medium	-0.747563	medium	-0.533921	medium	-0.626035	medium	-0.515659	medium	0.136698	small	-0.581071	medium	0.175796	small	-0.0323618	small	0.254769	small	0.437464	small	-0.553573	medium	0.354784	small
511	1362.72	1	44309.5	0.212077	small	-0.747968	medium	-0.592694	medium	-0.515549	medium	-0.789769	medium	-0.474466	small	-0.598586	medium	-0.427021	small	-0.890314	large	-0.723001	medium	-0.506069	medium	-0.730781	medium	-0.530835	medium	-0.611351	medium	-0.506621	medium	0.115225	small	-0.611597	medium	0.145194	small	-0.0494699	small	0.234364	small	0.44102	small	-0.552388	medium	0.364356	small
512	1363.72	1	13229.8	0.347478	small	-0.522274	medium	-0.410746	small	-0.306411	small	-0.686015	medium	-0.288651	small	-0.478315	small	-0.324905	small	-0.901997	large	-0.749928	medium	-0.480356	small	-0.776709	medium	-0.53017	medium	-0.649542	medium	-0.560757	medium	-0.0381604	small	-0.607367	medium	0.0543391	small	-0.201251	small	0.00682222	small	0.404802	small	-0.575378	medium	0.333811	small
513	1364.75	2	5961.27	0.718917	medium	0.0307585	small	0.0938063	small	0.165372	small	-0.248954	small	0.337521	small	-0.0114123	small	-0.0516699	small	-0.775519	medium	-0.673258	medium	-0.481692	small	-0.88184	large	-0.383686	small	-0.699166	medium	-0.711485	medium	-0.063941	small	-0.41762	small	0.153455	small	-0.176378	small	-0.1992	small	0.304002	small	-0.559789	medium	0.250741	small
514	1365.74	2	8183.03	0.905462	large	0.424618	small	0.445844	small	0.823155	large	0.405741	small	0.733269	medium	0.519734	medium	0.27578	small	-0.390969	small	-0.376795	small	-0.123723	small	-0.512091	medium	-0.130435	small	-0.381561	small	-0.598569	medium	-0.235133	small	-0.377752	small	-0.00289733	small	-0.243223	small	-0.467796	small	0.126595	small	-0.359987	small	0.124676	small
515	1367.75	2	4220.49	0.377562	small	0.329222	small	0.308471	small	0.54393	medium	0.36977	small	0.457745	small	0.277424	small	0.235808	small	-0.0242775	small	-0.0513215	small	0.145095	small	-0.0110484	small	0.0882516	small	-0.100405	small	-0.14423	small	-0.200275	small	-0.158499	small	-0.0526268	small	-0.247609	small	-0.295451	small	-0.0406089	small	-0.0999513	small	-0.0904067	small
516	1368.75	5	561.127	0.814553	large	0.596149	medium	0.579145	medium	1.08796	large	0.701339	medium	0.853478	large	0.704989	medium	0.378021	small	-0.0904822	small	-0.138466	small	0.208307	small	-0.0739276	small	0.0803192	small	-0.0948252	small	-0.417966	small	-0.348623	small	-0.272083	small	-0.118008	small	-0.297798	small	-0.631264	medium	-0.0629756	small	-0.148476	small	-0.0186159	small
517	1369.41	2	8218.82	0.0669376	small	0.363963	small	0.314352	small	0.432842	small	0.483515	small	0.384478	small	0.278717	small	0.278549	small	0.285715	small	0.235052	small	0.330585	small	0.387007	small	0.295676	small	0.19312	small	0.193201	small	-0.124693	small	0.0445643	small	-0.0333846	small	-0.171339	small	-0.172807	small	-0.170497	small	0.0774617	small	-0.21793	small
518	1371.76	2	4329.84	0.45315	small	0.729443	medium	0.687857	medium	1.0119	large	0.866328	large	0.809336	large	0.833681	large	0.520837	medium	0.254072	small	0.200999	small	0.425254	small	0.319819	small	0.294333	small	0.292265	small	-0.00133375	small	-0.275435	small	-0.143871	small	-0.141055	small	-0.168425	small	-0.517452	medium	-0.133014	small	0.00915291	small	-0.0273823	small
519	1373.76	4	691.943	0.848072	large	0.64516	medium	0.648902	medium	1.10724	large	0.7539	medium	0.921439	large	0.81616	large	0.449248	small	-0.0799111	small	-0.123479	small	0.231793	small	-0.0924041	small	0.0891205	small	-0.07584	small	-0.388399	small	-0.373998	small	-0.321404	small	-0.142211	small	-0.313939	small	-0.608174	medium	-0.0304628	small	-0.179963	small	0.0198546	small
520	1374.76	4	788.465	1.00762	large	0.610535	medium	0.615283	medium	1.30306	very large	0.751072	medium	1.04383	large	0.82442	large	0.454025	small	-0.211857	small	-0.181887	small	0.0402079	small	-0.40949	small	0.244308	small	-0.389469	small	-0.613774	medium	-0.220836	small	-0.507057	medium	0.195205	small	-0.491153	small	-0.7457	medium	0.167694	small	-0.583488	medium	0.0313274	small
521	1375.76	4	724.43	0.962286	large	0.61707	medium	0.614676	medium	1.23703	very large	0.735116	medium	1.06474	large	0.744619	medium	0.401735	small	-0.205455	small	-0.184484	small	0.0386886	small	-0.359158	small	0.249147	small	-0.369616	small	-0.611674	medium	-0.224445	small	-0.451783	small	0.203666	small	-0.468712	small	-0.755084	medium	0.132206	small	-0.566807	medium	-0.0110889	small
522	1376.76	2	5617.07	0.493284	small	0.621054	medium	0.593699	medium	0.813873	large	0.751822	medium	0.853507	large	0.640945	medium	0.403448	small	0.11197	small	0.081147	small	0.218645	small	0.147848	small	0.303176	small	0.0702592	small	-0.149055	small	-0.165203	small	-0.106608	small	0.0835629	small	-0.178718	small	-0.43155	small	-0.068183	small	-0.195973	small	-0.0854102	small
523	1377.69	3	2454.52	1.25105	very large	0.81306	large	0.847278	large	1.44997	very large	1.10895	large	1.26965	very large	1.1963	large	0.703774	medium	-0.0810045	small	-0.114578	small	0.227809	small	-0.126016	small	0.0918916	small	0.0524224	small	-0.542096	medium	-0.346955	small	-0.341204	small	-0.13584	small	-0.168002	small	-0.721193	medium	0.00413467	small	-0.212456	small	0.171267	small
524	1378.69	2	7356.44	0.951536	large	0.819629	large	0.82934	large	1.24595	very large	1.11182	large	1.09814	large	1.07604	large	0.729106	medium	0.0618882	small	0.00224612	small	0.259342	small	0.156978	small	0.151107	small	0.110517	small	-0.267233	small	-0.278318	small	-0.115331	small	-0.115448	small	-0.157734	small	-0.527312	medium	-0.157257	small	0.003391	small	-0.0467937	small
525	1379.74	4	746.274	1.18507	large	0.799646	medium	0.80926	large	1.48105	very large	1.02958	large	1.1482	large	1.09668	large	0.690832	medium	-0.124311	small	-0.177359	small	0.122978	small	-0.0783807	small	0.0599205	small	-0.111416	small	-0.515276	medium	-0.303194	small	-0.193467	small	-0.0565365	small	-0.234174	small	-0.655635	medium	-0.0947264	small	-0.132043	small	-0.0280908	small
526	1380.79	2	8468.16	0.190601	small	-0.222727	small	-0.196085	small	-0.0539676	small	-0.295772	small	-0.07361	small	-0.258181	small	-0.204443	small	-0.488345	small	-0.448952	small	-0.25271	small	-0.546879	medium	-0.283277	small	-0.504409	medium	-0.435467	small	-0.148742	small	-0.312936	small	-0.0196867	small	-0.262339	small	-0.177802	small	0.140506	small	-0.262802	small	0.0550986	small
527	1382.79	3	3891.07	0.302773	small	0.165802	small	0.1399	small	0.363531	small	0.161835	small	0.25258	small	0.10687	small	0.0520017	small	-0.150773	small	-0.180566	small	0.0724857	small	-0.155343	small	-0.0428532	small	-0.223983	small	-0.27	small	-0.257899	small	-0.227818	small	-0.109943	small	-0.302201	small	-0.341092	small	-0.0246746	small	-0.105815	small	-0.0655421	small
528	1383.79	4	848.696	0.392107	small	0.181013	small	0.16253	small	0.379362	small	0.115384	small	0.287606	small	0.14714	small	0.0252943	small	-0.291961	small	-0.302843	small	-0.00141247	small	-0.350939	small	-0.121999	small	-0.319225	small	-0.429181	small	-0.307863	small	-0.370195	small	-0.121245	small	-0.339856	small	-0.440566	small	0.0488111	small	-0.225356	small	0.041831	small
529	1384.77	1	19901.3	0.161633	small	-0.76761	medium	-0.602304	medium	-0.563498	medium	-0.829143	large	-0.468286	small	-0.654324	medium	-0.419903	small	-0.923691	large	-0.740297	medium	-0.577815	medium	-0.832637	large	-0.546511	medium	-0.694096	medium	-0.513231	medium	0.174317	small	-0.530967	medium	0.224757	small	-0.0391442	small	0.297831	small	0.46829	small	-0.59347	medium	0.389898	small
530	1385.77	2	6157.64	0.288567	small	-0.62283	medium	-0.461597	small	-0.499782	small	-0.823061	large	-0.257075	small	-0.590892	medium	-0.395483	small	-0.967778	large	-0.771488	medium	-0.633379	medium	-0.946966	large	-0.498511	small	-0.76619	medium	-0.617309	medium	0.172098	small	-0.589314	medium	0.329979	small	-0.0542046	small	0.195012	small	0.511354	medium	-0.741706	medium	0.458233	small
531	1385.86	4	872.202	0.33778	small	-0.503796	medium	-0.36816	small	-0.3971	small	-0.712068	medium	-0.16523	small	-0.507647	medium	-0.33838	small	-0.919687	large	-0.742777	medium	-0.588915	medium	-0.893208	large	-0.466187	small	-0.737624	medium	-0.613147	medium	0.120306	small	-0.514772	medium	0.283845	small	-0.102994	small	0.120285	small	0.451105	small	-0.66722	medium	0.370905	small
532	1386.77	3	2522.92	0.54986	medium	-0.234466	small	-0.10749	small	-0.200736	small	-0.640948	medium	0.159926	small	-0.290769	small	-0.228674	small	-0.881903	large	-0.705817	medium	-0.635371	medium	-1.06195	large	-0.374993	small	-0.787193	medium	-0.726868	medium	0.0949426	small	-0.578074	medium	0.332467	small	-0.0887551	small	-0.026887	small	0.48989	small	-0.776127	medium	0.465157	small
533	1387.78	2	8397.75	0.612733	medium	0.0339018	small	0.0544421	small	0.0685661	small	-0.0373263	small	0.295273	small	-0.0691964	small	-0.0865263	small	-0.580931	medium	-0.546551	medium	-0.475633	small	-0.599976	medium	-0.270402	small	-0.648026	medium	-0.650561	medium	-0.00796279	small	-0.0962688	small	0.203226	small	-0.133982	small	-0.145217	small	0.0856393	small	-0.304635	small	-0.0271537	small
534	1389.84	1	11930.3	0.202768	small	0.343957	small	0.278027	small	0.33381	small	0.588109	medium	0.361946	small	0.267181	small	0.23111	small	0.153821	small	0.0777734	small	0.118382	small	0.37706	small	0.158648	small	0.0543167	small	0.0188516	small	-0.0433497	small	0.253294	small	0.0426526	small	-0.0699438	small	-0.107036	small	-0.321751	small	0.213141	small	-0.337363	small
535	1391.78	5	476.79	0.865641	large	0.73055	medium	0.709505	medium	1.22199	very large	0.916926	large	1.05225	large	0.881815	large	0.475468	small	-0.0266344	small	-0.0818296	small	0.187158	small	0.0465073	small	0.19483	small	-0.0426396	small	-0.429428	small	-0.279825	small	-0.140883	small	0.0144071	small	-0.245575	small	-0.683482	medium	-0.130097	small	-0.15059	small	-0.0915181	small
536	1393.77	2	4492.17	0.342114	small	0.592062	medium	0.54622	medium	0.551137	medium	0.831914	large	0.638053	medium	0.559663	medium	0.509891	medium	0.269847	small	0.209182	small	0.173999	small	0.479413	small	0.287312	small	0.188289	small	0.155403	small	0.0385855	small	0.314391	small	0.122558	small	0.00988145	small	-0.0168676	small	-0.296043	small	0.19413	small	-0.32347	small
537	1394.26	2	7296.79	0.18224	small	0.637272	medium	0.576408	medium	0.639027	medium	0.893232	large	0.567017	medium	0.657301	medium	0.554082	medium	0.456693	small	0.387021	small	0.418428	small	0.685021	medium	0.367575	small	0.443104	small	0.355289	small	-0.0255041	small	0.300964	small	-0.0336646	small	0.0112897	small	-0.0498774	small	-0.344315	small	0.330973	small	-0.30977	small
538	1396.79	3	3386.05	0.252224	small	0.640934	medium	0.614765	medium	0.794628	medium	0.766037	medium	0.647014	medium	0.757206	medium	0.501045	medium	0.381084	small	0.342847	small	0.48734	small	0.46035	small	0.361138	small	0.446183	small	0.212339	small	-0.208005	small	-0.0837008	small	-0.149131	small	-0.105699	small	-0.329728	small	-0.126095	small	0.0803593	small	-0.0228599	small
539	1400.76	2	6814.7	0.309791	small	0.610021	medium	0.572015	medium	0.934295	large	0.705234	medium	0.649732	medium	0.673572	medium	0.447544	small	0.298004	small	0.245918	small	0.557337	medium	0.354268	small	0.313921	small	0.31318	small	0.102582	small	-0.375964	small	-0.242476	small	-0.251863	small	-0.303818	small	-0.520447	medium	-0.120966	small	0.0259513	small	-0.0549136	small
540	1401.74	4	1411.05	0.950448	large	0.637678	medium	0.634597	medium	1.5235	very large	0.951656	large	1.10958	large	0.960717	large	0.57122	medium	0.146907	small	0.154206	small	0.560901	medium	-0.0161983	small	0.0451444	small	0.465526	small	-0.129239	small	-0.266266	small	-0.587136	medium	-0.546705	medium	0.0673122	small	-0.586546	medium	0.165311	small	-0.0631801	small	0.480356	small
541	1402.75	4	1135.56	0.921804	large	0.664071	medium	0.666576	medium	1.54824	very large	0.877426	large	1.05966	large	0.980408	large	0.577065	medium	0.107937	small	0.126505	small	0.440395	small	-0.0826765	small	0.0795457	small	0.417514	small	-0.182568	small	-0.207664	small	-0.543968	medium	-0.374248	small	0.0971076	small	-0.565183	medium	0.185021	small	-0.167878	small	0.478125	small
542	1403.78	2	7467.34	0.690297	medium	0.685514	medium	0.680288	medium	1.12133	large	0.769505	medium	0.917297	large	0.891627	large	0.51552	medium	0.0936231	small	0.102043	small	0.278293	small	-0.00843914	small	0.207117	small	0.275368	small	-0.196386	small	-0.152454	small	-0.33147	small	-0.0629354	small	0.0349533	small	-0.51412	medium	0.113609	small	-0.236035	small	0.303359	small
543	1405.46	2	9214.16	0.510021	medium	0.0605543	small	0.126637	small	0.0651559	small	-0.15901	small	0.1707	small	0.203072	small	0.0103504	small	-0.541376	medium	-0.446192	small	-0.401768	small	-0.658648	medium	-0.349899	small	-0.33851	small	-0.500404	medium	0.0597448	small	-0.256259	small	0.102188	small	0.134115	small	-0.058633	small	0.287425	small	-0.355061	small	0.404452	small
544	1406.75	2	8055.48	0.403861	small	-0.205003	small	-0.0918337	small	-0.169703	small	-0.510828	medium	-0.105436	small	0.00552208	small	-0.154845	small	-0.72135	medium	-0.570483	medium	-0.487329	small	-0.824833	large	-0.489017	small	-0.411277	small	-0.537876	medium	0.107458	small	-0.463173	small	0.0807996	small	0.214967	small	0.0302148	small	0.46538	small	-0.49356	small	0.681145	medium
545	1407.75	2	5833.19	0.461446	small	-0.110827	small	-0.00783573	small	-0.0978849	small	-0.425323	small	-0.0191768	small	0.0959638	small	-0.0950839	small	-0.684624	medium	-0.543865	medium	-0.483866	small	-0.820993	large	-0.471982	small	-0.389692	small	-0.542013	medium	0.101444	small	-0.410922	small	0.0864663	small	0.212569	small	0.00822323	small	0.430174	small	-0.466073	small	0.632835	medium
546	1408.76	1	11308.3	0.759452	medium	0.283971	small	0.335515	small	0.428824	small	0.0947833	small	0.50781	medium	0.464307	small	0.120527	small	-0.515996	medium	-0.433254	small	-0.348395	small	-0.678195	medium	-0.239659	small	-0.352627	small	-0.623725	medium	-0.0316669	small	-0.351254	small	0.119511	small	0.0364653	small	-0.283113	small	0.262396	small	-0.431179	small	0.385764	small
547	1413.78	1	13265.4	0.694975	medium	0.607211	medium	0.584384	medium	0.988219	large	0.734779	medium	0.80302	large	0.729017	medium	0.432327	small	-0.0476391	small	-0.0668113	small	0.137375	small	-0.0590453	small	0.153185	small	-0.0697188	small	-0.321756	small	-0.214645	small	-0.227637	small	0.0284001	small	-0.240168	small	-0.531504	medium	-0.0117632	small	-0.221447	small	-0.0123467	small
548	1414.78	4	751.823	0.936253	large	0.636643	medium	0.653881	medium	1.20346	very large	0.673368	medium	0.879473	large	0.901762	large	0.47906	small	-0.115619	small	-0.118696	small	0.190325	small	-0.236668	small	0.00671469	small	0.0380184	small	-0.430761	small	-0.304044	small	-0.420474	small	-0.170455	small	-0.139762	small	-0.619039	medium	0.101876	small	-0.229768	small	0.259184	small
549	1415.78	4	707.297	0.970329	large	0.678935	medium	0.694556	medium	1.25823	very large	0.733487	medium	0.938961	large	0.951894	large	0.509315	medium	-0.0948876	small	-0.103451	small	0.21069	small	-0.196113	small	0.0470451	small	0.0463367	small	-0.435071	small	-0.307225	small	-0.396389	small	-0.148277	small	-0.152425	small	-0.643375	medium	0.080703	small	-0.229006	small	0.230889	small
550	1416.79	4	700.712	0.729291	medium	0.478437	small	0.493045	small	0.887471	large	0.434182	small	0.673305	medium	0.637445	medium	0.316486	small	-0.149227	small	-0.14929	small	0.130972	small	-0.267877	small	-0.00774621	small	-0.061329	small	-0.392551	small	-0.277525	small	-0.388622	small	-0.128179	small	-0.183609	small	-0.51677	medium	0.106916	small	-0.243899	small	0.198145	small
551	1417.78	5	555.471	0.796942	medium	0.540059	medium	0.544228	medium	0.968832	large	0.596195	medium	0.79895	medium	0.692199	medium	0.336599	small	-0.116434	small	-0.148815	small	0.16473	small	-0.146856	small	0.0554359	small	-0.0935412	small	-0.424292	small	-0.313508	small	-0.292888	small	-0.101823	small	-0.24978	small	-0.564157	medium	-0.0014645	small	-0.191554	small	0.0563224	small
552	1419.79	2	7788.3	0.382724	small	0.374208	small	0.378528	small	0.569043	medium	0.360836	small	0.499167	small	0.468571	small	0.23864	small	0.0152218	small	0.0139341	small	0.150515	small	-0.0325518	small	0.12161	small	0.0728785	small	-0.158641	small	-0.14138	small	-0.19065	small	-0.0242013	small	-0.0810227	small	-0.329083	small	0.0464623	small	-0.156759	small	0.108511	small
553	1420.79	4	775.058	0.84881	large	0.481841	small	0.488347	small	0.77143	medium	0.532434	medium	0.834193	large	0.629402	medium	0.17329	small	-0.276063	small	-0.27082	small	-0.164958	small	-0.309369	small	0.0480919	small	-0.255342	small	-0.663131	medium	-0.101717	small	-0.144907	small	0.195756	small	-0.0856032	small	-0.547209	medium	0.0353818	small	-0.337173	small	0.0640024	small
554	1422.76	1	10355.2	0.657824	medium	0.507831	medium	0.489682	small	0.904604	large	0.768455	medium	0.792175	medium	0.544811	medium	0.246465	small	-0.0582158	small	-0.171229	small	0.321184	small	0.0329198	small	0.110099	small	-0.187136	small	-0.451018	small	-0.567429	medium	-0.319382	small	-0.233478	small	-0.492271	small	-0.705496	medium	-0.21625	small	-0.0862467	small	-0.244892	small
555	1423.78	2	9100.67	0.557629	medium	0.523288	medium	0.496467	small	0.880839	large	0.763041	medium	0.758757	medium	0.517478	medium	0.280625	small	-0.00876159	small	-0.1147	small	0.338	small	0.0942666	small	0.133195	small	-0.136451	small	-0.335615	small	-0.56082	medium	-0.301844	small	-0.243533	small	-0.497023	small	-0.669407	medium	-0.234632	small	-0.0514271	small	-0.276017	small
556	1427.1	2	9274.66	0.587873	medium	0.483059	small	0.429271	small	0.797138	medium	0.678978	medium	0.670077	medium	0.474243	small	0.257147	small	-0.0867887	small	-0.136782	small	0.0523059	small	0.0127819	small	0.105714	small	-0.181599	small	-0.368962	small	-0.200769	small	-0.0464964	small	0.0598711	small	-0.279813	small	-0.521135	medium	-0.157747	small	-0.102793	small	-0.219714	small
557	1427.76	4	706.414	0.970166	large	0.704753	medium	0.685172	medium	1.37154	very large	0.952177	large	1.01043	large	0.927704	large	0.492078	small	-0.0416149	small	-0.122187	small	0.194284	small	0.0845098	small	0.107855	small	-0.033197	small	-0.483652	small	-0.318214	small	-0.0935939	small	-0.0736795	small	-0.225741	small	-0.725743	medium	-0.204395	small	-0.0206513	small	-0.114629	small
558	1430.7	1	55400.1	0.352643	small	-0.593693	medium	-0.432279	small	-0.433375	small	-0.744201	medium	-0.30766	small	-0.47824	small	-0.32953	small	-0.946854	large	-0.760047	medium	-0.536481	medium	-0.781151	medium	-0.533359	medium	-0.63238	medium	-0.554483	medium	0.154057	small	-0.988606	large	0.254843	small	0.00302358	small	0.203293	small	0.547897	medium	-0.75709	medium	0.584352	medium
559	1431.7	1	21048.8	0.36032	small	-0.572983	medium	-0.407672	small	-0.435875	small	-0.748042	medium	-0.331551	small	-0.411386	small	-0.310817	small	-0.93905	large	-0.749877	medium	-0.539666	medium	-0.783216	medium	-0.550844	medium	-0.598258	medium	-0.547639	medium	0.187409	small	-0.914646	large	0.222206	small	0.133471	small	0.231512	small	0.578215	medium	-0.725296	medium	0.708569	medium
560	1432.71	1	14220.4	0.480598	small	-0.290419	small	-0.159807	small	-0.187488	small	-0.6153	medium	-0.092429	small	-0.15888	small	-0.185125	small	-0.903287	large	-0.723298	medium	-0.51631	medium	-0.846937	large	-0.528306	medium	-0.575574	medium	-0.594634	medium	0.0613152	small	-0.80671	large	0.125764	small	0.0541697	small	0.0124498	small	0.544868	medium	-0.703483	medium	0.676515	medium
561	1434.76	1	10512	0.759464	medium	0.185538	small	0.256759	small	0.393992	small	-0.128332	small	0.442038	small	0.278686	small	0.0912901	small	-0.637901	medium	-0.533064	medium	-0.380525	small	-0.844386	large	-0.311894	small	-0.500793	medium	-0.655988	medium	-0.0916783	small	-0.551947	medium	0.0843913	small	-0.101765	small	-0.28938	small	0.36306	small	-0.552336	medium	0.413892	small
562	1437.12	1	10715.7	0.477073	small	0.428904	small	0.434721	small	0.721219	medium	0.385811	small	0.691261	medium	0.419432	small	0.279041	small	-0.0245334	small	-0.0194625	small	0.173065	small	-0.115579	small	0.21991	small	-0.0842066	small	-0.219533	small	-0.199246	small	-0.313723	small	0.0563788	small	-0.278584	small	-0.432379	small	0.0939949	small	-0.341719	small	0.0332351	small
563	1439.93	2	5321.22	0.197686	small	0.460653	small	0.416314	small	0.576525	medium	0.556814	medium	0.619034	medium	0.380624	small	0.269418	small	0.23796	small	0.194322	small	0.310655	small	0.303329	small	0.375511	small	0.142707	small	0.0423207	small	-0.14576	small	-0.0301959	small	0.076516	small	-0.212724	small	-0.328331	small	-0.118924	small	-0.108766	small	-0.184202	small
564	1440.78	3	2290.08	0.289669	small	0.609659	medium	0.547456	medium	0.831952	large	0.747987	medium	0.758678	medium	0.58879	medium	0.341412	small	0.286938	small	0.223943	small	0.426008	small	0.376783	small	0.408635	small	0.231659	small	0.00594239	small	-0.244992	small	-0.0781924	small	-0.00471512	small	-0.246874	small	-0.529322	medium	-0.170627	small	-0.0668213	small	-0.166438	small
565	1441.77	4	776.579	0.887414	large	0.814382	large	0.785824	medium	1.5749	very large	1.0747	large	1.13184	large	1.0604	large	0.562895	medium	0.0960833	small	0.0102897	small	0.394815	small	0.229203	small	0.273166	small	0.0954269	small	-0.379959	small	-0.391257	small	-0.135776	small	-0.0899554	small	-0.318369	small	-0.882727	large	-0.228987	small	-0.0430847	small	-0.147775	small
566	1442.79	1	10355.4	0.487407	small	0.727721	medium	0.663742	medium	1.05675	large	0.958981	large	0.906388	large	0.784604	medium	0.433819	small	0.221399	small	0.141463	small	0.366934	small	0.365898	small	0.336927	small	0.195437	small	-0.134546	small	-0.267416	small	-0.00365879	small	-0.0204583	small	-0.207236	small	-0.653222	medium	-0.258558	small	0.0169949	small	-0.194582	small
567	1444.8	4	748.637	1.0005	large	0.732445	medium	0.7212	medium	1.39708	very large	0.89465	large	1.08419	large	0.950427	large	0.500154	medium	-0.143686	small	-0.168034	small	0.124589	small	-0.167938	small	0.114563	small	-0.111055	small	-0.550709	medium	-0.303497	small	-0.316167	small	-0.00336816	small	-0.251274	small	-0.775304	medium	-0.00422908	small	-0.282058	small	0.0585332	small
568	1445.79	4	776.935	0.99261	large	0.760691	medium	0.754376	medium	1.53842	very large	0.900717	large	1.16623	large	0.983996	large	0.521133	medium	-0.111035	small	-0.12741	small	0.238437	small	-0.196768	small	0.19018	small	-0.0936878	small	-0.530454	medium	-0.383828	small	-0.487215	small	-0.0358167	small	-0.360007	small	-0.887263	large	0.0616063	small	-0.39423	small	0.108241	small
569	1446.8	4	846.742	0.732893	medium	0.424463	small	0.448182	small	1.08512	large	0.34744	small	0.868984	large	0.541041	medium	0.108817	small	-0.283878	small	-0.274357	small	0.146228	small	-0.477549	small	0.108301	small	-0.355562	small	-0.621467	medium	-0.470455	small	-0.729334	medium	-0.0390312	small	-0.584164	medium	-0.905624	large	0.215419	small	-0.603923	medium	0.177016	small
570	1447.8	4	872.311	0.67913	medium	0.379807	small	0.389032	small	1.03201	large	0.284994	small	0.78194	medium	0.431515	small	0.0478674	small	-0.265029	small	-0.269636	small	0.188272	small	-0.438216	small	0.0947302	small	-0.338599	small	-0.608482	medium	-0.508379	medium	-0.709775	medium	-0.0916014	small	-0.597926	medium	-0.914694	large	0.173527	small	-0.537693	medium	0.132089	small
571	1448.8	4	677.872	0.696119	medium	0.467787	small	0.456093	small	1.07101	large	0.472287	small	0.806051	large	0.542819	medium	0.156368	small	-0.173496	small	-0.194836	small	0.214962	small	-0.263964	small	0.130013	small	-0.224412	small	-0.541788	medium	-0.439381	small	-0.527506	medium	-0.073645	small	-0.492104	small	-0.861227	large	0.0651874	small	-0.389915	small	0.0494408	small
572	1452.77	2	5558.43	0.461502	small	0.16525	small	0.195749	small	0.337916	small	0.0123836	small	0.458539	small	0.158114	small	-0.0264505	small	-0.291434	small	-0.245641	small	-0.142338	small	-0.451247	small	0.0254209	small	-0.311573	small	-0.479275	small	-0.100942	small	-0.336571	small	0.154034	small	-0.177032	small	-0.367513	small	0.185444	small	-0.444135	small	0.150174	small
573	1459.76	1	14171.9	0.630354	medium	0.497507	small	0.468785	small	1.08129	large	0.734232	medium	0.72735	medium	0.589781	medium	0.304046	small	-0.0102855	small	-0.119569	small	0.405533	small	0.0849508	small	0.00949483	small	-0.0101292	small	-0.372201	small	-0.609775	medium	-0.336405	small	-0.423024	small	-0.400448	small	-0.790417	medium	-0.213121	small	0.0814856	small	-0.0924707	small
574	1459.87	4	1171.35	0.65071	medium	0.475095	small	0.459996	small	1.01831	large	0.708363	medium	0.716077	medium	0.583683	medium	0.281663	small	-0.0266103	small	-0.143425	small	0.405907	small	0.0578378	small	-0.00259484	small	-0.0386472	small	-0.399024	small	-0.638401	medium	-0.360019	small	-0.423138	small	-0.427102	small	-0.761545	medium	-0.206042	small	0.0635744	small	-0.0949204	small
575	1460.76	1	12909.3	0.646946	medium	0.506283	medium	0.489107	small	1.14547	large	0.733845	medium	0.733784	medium	0.632702	medium	0.311941	small	0.00200656	small	-0.1108	small	0.505616	medium	0.0577593	small	0.0229427	small	0.00034508	small	-0.368853	small	-0.731088	medium	-0.4717	small	-0.503424	medium	-0.49602	small	-0.851989	large	-0.174293	small	0.0372535	small	-0.0563808	small
576	1460.85	3	1585.03	0.715254	medium	0.518864	medium	0.525175	medium	1.16913	large	0.758475	medium	0.789466	medium	0.687718	medium	0.326102	small	-0.00200982	small	-0.128737	small	0.556597	medium	0.0361363	small	0.0214007	small	-0.00800192	small	-0.416149	small	-0.820831	large	-0.536767	medium	-0.548796	medium	-0.552412	medium	-0.889018	large	-0.167571	small	0.015963	small	-0.0434844	small
577	1461.76	3	3716.5	0.858249	large	0.613735	medium	0.641571	medium	1.30281	very large	0.870219	large	0.914618	large	0.900958	large	0.460529	small	0.0273364	small	-0.0642359	small	0.597695	medium	0.00318376	small	0.148925	small	0.0281003	small	-0.423139	small	-0.769437	medium	-0.6047	medium	-0.442921	small	-0.576494	medium	-0.926134	large	-0.0676738	small	-0.147717	small	0.0252129	small
578	1462.81	3	2882.01	0.881424	large	0.510911	medium	0.501903	medium	1.15818	large	0.626361	medium	0.787934	medium	0.68498	medium	0.254786	small	-0.142642	small	-0.215024	small	0.327464	small	-0.173878	small	0.0757234	small	-0.21346	small	-0.618425	medium	-0.551654	medium	-0.462636	small	-0.212271	small	-0.516816	medium	-0.877479	large	-0.0419183	small	-0.220925	small	-0.0231276	small
579	1463.84	3	1852.91	0.873449	large	0.491031	small	0.446028	small	1.02279	large	0.796352	medium	0.781346	medium	0.55744	medium	0.223398	small	-0.0356921	small	-0.172217	small	0.147482	small	0.211312	small	0.14804	small	-0.219411	small	-0.630712	medium	-0.300849	small	0.0778104	small	0.0162877	small	-0.334317	small	-0.745664	medium	-0.369179	small	0.0627219	small	-0.364879	small
580	1464.84	1	830527	-0.242555	small	-1.20942	very large	-0.987567	large	-0.867669	large	-1.05989	large	-0.831123	large	-0.926964	large	-0.668399	medium	-0.840997	large	-0.653555	medium	-0.610931	medium	-0.786358	medium	-0.553686	medium	-0.650405	medium	-0.38736	small	0.324716	small	-0.300801	small	0.318013	small	0.190526	small	0.497598	small	0.438495	small	-0.498241	small	0.378828	small
581	1465.84	1	587908	-0.19627	small	-1.17263	large	-0.957878	large	-0.826635	large	-1.03506	large	-0.800042	large	-0.897739	large	-0.653267	medium	-0.853218	large	-0.668499	medium	-0.589392	medium	-0.782052	medium	-0.552469	medium	-0.647359	medium	-0.408971	small	0.283643	small	-0.412947	small	0.281681	small	0.127859	small	0.447924	small	0.443399	small	-0.52039	medium	0.385772	small
582	1466.84	1	84877.2	-0.101961	small	-1.08848	large	-0.89064	large	-0.750259	medium	-0.969344	large	-0.731582	medium	-0.83	large	-0.618455	medium	-0.860624	large	-0.684958	medium	-0.550846	medium	-0.750491	medium	-0.540089	medium	-0.627195	medium	-0.44175	small	0.229383	small	-0.43657	small	0.243724	small	0.0610786	small	0.370129	small	0.436263	small	-0.539629	medium	0.369139	small
583	1466.86	1	16902.4	-0.0505324	small	-1.02416	large	-0.838983	large	-0.69708	medium	-0.927265	large	-0.682087	medium	-0.786221	medium	-0.590829	medium	-0.857215	large	-0.687797	medium	-0.529654	medium	-0.738382	medium	-0.530629	medium	-0.61889	medium	-0.456118	small	0.184903	small	-0.456745	small	0.207264	small	0.0129	small	0.308851	small	0.42562	small	-0.537894	medium	0.359482	small
584	1467.84	1	15009.8	0.0555687	small	-0.891169	large	-0.734034	medium	-0.603036	medium	-0.889786	large	-0.575001	medium	-0.721124	medium	-0.555309	medium	-0.874056	large	-0.714313	medium	-0.519513	medium	-0.776667	medium	-0.526176	medium	-0.64256	medium	-0.514758	medium	0.0887262	small	-0.463274	small	0.148825	small	-0.0766707	small	0.162553	small	0.409574	small	-0.547173	medium	0.336751	small
585	1467.96	3	1883.64	0.190815	small	-0.666609	medium	-0.575158	medium	-0.406081	small	-0.764454	medium	-0.41457	small	-0.59371	medium	-0.5037	medium	-0.839619	large	-0.722121	medium	-0.457899	small	-0.763145	medium	-0.505853	medium	-0.638032	medium	-0.577594	medium	-0.0561145	small	-0.397366	small	0.0409688	small	-0.160431	small	-0.0519141	small	0.32007	small	-0.45506	small	0.259466	small
586	1468.84	2	6804.6	0.45212	small	-0.296103	small	-0.24407	small	-0.114459	small	-0.546676	medium	-0.0442239	small	-0.360359	small	-0.334398	small	-0.793175	medium	-0.718307	medium	-0.457988	small	-0.877966	large	-0.452642	small	-0.727933	medium	-0.710136	medium	-0.106189	small	-0.377882	small	0.0652829	small	-0.203322	small	-0.181096	small	0.28166	small	-0.468169	small	0.206555	small
587	1469.83	3	2034.21	0.787904	medium	0.254525	small	0.271881	small	0.552449	medium	0.176896	small	0.556892	medium	0.300312	small	0.0170783	small	-0.436866	small	-0.433346	small	-0.183893	small	-0.551105	medium	-0.145176	small	-0.463248	small	-0.711707	medium	-0.219561	small	-0.325259	small	0.0369438	small	-0.239084	small	-0.478521	small	0.111526	small	-0.359691	small	0.102775	small
588	1470.82	3	2306.89	0.612534	medium	0.381798	small	0.388982	small	0.578188	medium	0.378137	small	0.640184	medium	0.39981	small	0.215732	small	-0.160602	small	-0.158158	small	-0.0501922	small	-0.210318	small	0.0870985	small	-0.212169	small	-0.386002	small	-0.106772	small	-0.156536	small	0.124833	small	-0.158886	small	-0.336054	small	0.0456554	small	-0.275715	small	0.00500251	small
589	1471.81	3	3136.39	0.419558	small	0.430732	small	0.42193	small	0.541856	medium	0.466705	small	0.618764	medium	0.460767	small	0.242759	small	0.0227758	small	0.0122517	small	0.0832227	small	0.0302452	small	0.205782	small	0.01558	small	-0.20087	small	-0.0727016	small	-0.0562029	small	0.126817	small	-0.0739156	small	-0.313682	small	-0.0180665	small	-0.184001	small	-0.0157969	small
590	1472.82	2	6095.67	0.205118	small	0.506669	medium	0.45439	small	0.545587	medium	0.633477	medium	0.592337	medium	0.46727	small	0.306214	small	0.275421	small	0.224619	small	0.287462	small	0.378122	small	0.357444	small	0.222806	small	0.064164	small	-0.0836976	small	0.0891472	small	0.0913914	small	-0.0870396	small	-0.296417	small	-0.16943	small	-0.0164264	small	-0.174981	small
591	1473.83	5	578.096	0.892059	large	0.842673	large	0.817804	large	1.47316	very large	1.07738	large	1.14178	large	1.0655	large	0.632761	medium	0.0830665	small	0.0245571	small	0.325908	small	0.162391	small	0.291036	small	0.0901586	small	-0.36027	small	-0.307088	small	-0.160652	small	-0.00609355	small	-0.25456	small	-0.8051	large	-0.140275	small	-0.141608	small	-0.0798037	small
592	1474.83	5	599.771	0.822856	large	0.751295	medium	0.734618	medium	1.33917	very large	0.96304	large	1.07305	large	0.912136	large	0.529348	medium	0.0320326	small	-0.0480806	small	0.243271	small	0.161244	small	0.210593	small	-0.000679933	small	-0.385326	small	-0.317341	small	-0.066669	small	-0.0247803	small	-0.270178	small	-0.758259	medium	-0.225257	small	-0.0425287	small	-0.171373	small
593	1475.83	4	718.789	0.832558	large	0.694399	medium	0.713957	medium	1.2991	very large	0.843226	large	1.0518	large	0.883469	large	0.543082	medium	0.0503749	small	-0.0219589	small	0.243755	small	0.166956	small	0.19532	small	0.0543906	small	-0.340548	small	-0.273331	small	-0.0351107	small	-0.0430724	small	-0.184204	small	-0.655376	medium	-0.203973	small	0.000102038	small	-0.11942	small
594	1476.86	2	5845.52	0.482827	small	0.507677	medium	0.475742	small	1.0309	large	0.801543	large	0.694499	medium	0.628724	medium	0.3822	small	0.260642	small	0.158194	small	0.591744	medium	0.519501	medium	0.238716	small	0.307253	small	-0.0683704	small	-0.392221	small	0.066269	small	-0.368448	small	-0.174695	small	-0.629326	medium	-0.431809	small	0.367333	small	-0.228433	small
595	1477.81	1	28165.1	0.238412	small	0.424159	small	0.364449	small	0.753312	medium	0.634278	medium	0.382246	small	0.541165	medium	0.258988	small	0.245838	small	0.17389	small	0.543498	medium	0.430152	small	0.189141	small	0.334428	small	0.0309758	small	-0.337176	small	-0.107523	small	-0.276285	small	-0.195128	small	-0.499092	small	-0.225783	small	0.192577	small	-0.093074	small
596	1478.81	1	32798.5	0.379289	small	0.518241	medium	0.461884	small	0.929744	large	0.754423	medium	0.513714	medium	0.684994	medium	0.318737	small	0.237018	small	0.157273	small	0.572503	medium	0.418849	small	0.193081	small	0.344918	small	-0.0498015	small	-0.393022	small	-0.143359	small	-0.315113	small	-0.212983	small	-0.603699	medium	-0.239613	small	0.19199	small	-0.0733584	small
597	1479.81	2	6269.88	0.615257	medium	0.671407	medium	0.617712	medium	1.18895	large	0.96396	large	0.759693	medium	0.894525	large	0.417679	small	0.206146	small	0.108724	small	0.543309	medium	0.405239	small	0.187373	small	0.318416	small	-0.183433	small	-0.422978	small	-0.113948	small	-0.324724	small	-0.205519	small	-0.714245	medium	-0.293061	small	0.211178	small	-0.0907418	small
598	1480.81	2	4206.16	0.816507	large	0.870891	large	0.826215	large	1.57606	very large	1.18777	large	1.13438	large	1.11995	large	0.569422	medium	0.169611	small	0.0595272	small	0.49621	small	0.355789	small	0.242621	small	0.221368	small	-0.296266	small	-0.47422	small	-0.12055	small	-0.262464	small	-0.291358	small	-0.889013	large	-0.324304	small	0.128105	small	-0.152705	small
599	1481.8	3	1531.2	0.907659	large	0.83351	large	0.805825	large	1.5925	very large	1.06943	large	1.15019	large	1.07233	large	0.565625	medium	0.0514988	small	-0.0320013	small	0.400747	small	0.149945	small	0.209765	small	0.0671506	small	-0.393169	small	-0.46551	small	-0.245332	small	-0.18325	small	-0.363801	small	-0.897238	large	-0.19105	small	-0.0599296	small	-0.0916493	small
600	1482.21	2	6679.19	0.581483	medium	0.878775	large	0.806804	large	1.42645	very large	1.09871	large	1.04501	large	1.0217	large	0.54267	medium	0.25615	small	0.168569	small	0.546303	medium	0.359181	small	0.348889	small	0.263244	small	-0.124347	small	-0.461548	small	-0.238227	small	-0.208988	small	-0.37777	small	-0.842784	large	-0.221693	small	-0.00970749	small	-0.121721	small
601	1483.8	5	515.568	1.08644	large	0.837829	large	0.832753	large	1.60402	very large	1.01593	large	1.22915	very large	1.13479	large	0.580236	medium	-0.092619	small	-0.14293	small	0.224498	small	-0.0715008	small	0.150273	small	-0.0662305	small	-0.544064	medium	-0.385783	small	-0.302152	small	-0.0660518	small	-0.318132	small	-0.859995	large	-0.0694625	small	-0.221848	small	0.00947128	small
602	1484.8	3	2551.27	0.605926	medium	0.788772	medium	0.742086	medium	1.1578	large	0.932716	large	1.00341	large	0.882981	large	0.490787	small	0.156328	small	0.0996382	small	0.353424	small	0.222737	small	0.319254	small	0.150257	small	-0.18389	small	-0.296637	small	-0.157825	small	-0.0273193	small	-0.259547	small	-0.657145	medium	-0.138653	small	-0.119458	small	-0.0886817	small
603	1486.01	2	8755.35	0.160771	small	0.102562	small	0.0952982	small	0.0765519	small	0.107538	small	0.210481	small	0.0522611	small	0.00474433	small	-0.0966777	small	-0.0984986	small	-0.0938529	small	-0.0747757	small	0.0436965	small	-0.138981	small	-0.181094	small	0.00808884	small	0.030852	small	0.153526	small	-0.0415699	small	-0.0928459	small	-0.0221723	small	-0.132595	small	-0.0744733	small
604	1486.81	3	1854.87	-0.0038124	small	-0.363409	small	-0.285763	small	-0.245068	small	-0.36095	small	-0.193049	small	-0.287467	small	-0.215169	small	-0.519473	medium	-0.416932	small	-0.444643	small	-0.661133	medium	-0.328458	small	-0.51797	medium	-0.330231	small	0.087798	small	-0.229557	small	0.191697	small	-0.0187613	small	0.0903654	small	0.25306	small	-0.410135	small	0.210387	small
605	1487.8	3	3939.47	0.0638951	small	-0.226115	small	-0.196074	small	-0.10564	small	-0.227923	small	-0.0826597	small	-0.228439	small	-0.18	small	-0.401976	small	-0.366012	small	-0.258009	small	-0.464512	small	-0.219794	small	-0.468665	small	-0.349632	small	-0.0792385	small	-0.207826	small	0.056775	small	-0.216138	small	-0.100084	small	0.100318	small	-0.258267	small	-0.00514886	small
606	1488.79	3	2148.52	0.334625	small	0.120281	small	0.0876995	small	0.344447	small	0.111081	small	0.263694	small	0.0132836	small	-0.0257709	small	-0.246186	small	-0.291791	small	0.0486961	small	-0.262716	small	-0.0703573	small	-0.40205	small	-0.402299	small	-0.331885	small	-0.285861	small	-0.10869	small	-0.417446	small	-0.406686	small	-0.0307478	small	-0.182075	small	-0.126147	small
607	1490.82	1	13205.8	0.516921	medium	0.408978	small	0.356256	small	0.724553	medium	0.582248	medium	0.645289	medium	0.295413	small	0.193286	small	-0.0455049	small	-0.120613	small	0.197884	small	0.0639312	small	0.154531	small	-0.23275	small	-0.31607	small	-0.327121	small	-0.138334	small	-0.0409684	small	-0.42943	small	-0.505268	medium	-0.184656	small	-0.0947613	small	-0.298189	small
608	1491.82	4	872.933	0.990951	large	0.635285	medium	0.628135	medium	1.2366	very large	0.778606	medium	0.962545	large	0.859489	large	0.391582	small	-0.195025	small	-0.223602	small	0.100114	small	-0.228437	small	0.0756998	small	-0.20931	small	-0.596783	medium	-0.327897	small	-0.334562	small	-0.017622	small	-0.321843	small	-0.734827	medium	-0.00234608	small	-0.285349	small	0.0271567	small
609	1492.81	4	893.295	0.875248	large	0.650781	medium	0.637376	medium	1.18986	large	0.776028	medium	0.965876	large	0.801369	large	0.413796	small	-0.107298	small	-0.139294	small	0.155068	small	-0.114082	small	0.146133	small	-0.128345	small	-0.481619	small	-0.301255	small	-0.278427	small	0.0007895	small	-0.301039	small	-0.69524	medium	-0.0273663	small	-0.255962	small	-0.0116424	small
610	1493.49	4	1274.53	0.218994	small	0.306171	small	0.269523	small	0.583678	medium	0.34891	small	0.462646	small	0.249736	small	0.119338	small	0.0876676	small	0.0457321	small	0.326389	small	0.114819	small	0.226533	small	0.01605	small	-0.106949	small	-0.308927	small	-0.227292	small	-0.103445	small	-0.337953	small	-0.467091	small	-0.0729607	small	-0.119492	small	-0.105508	small
611	1493.8	2	4083.94	0.574125	medium	0.429758	small	0.407901	small	1.00274	large	0.462338	small	0.66991	medium	0.569703	medium	0.0777146	small	-0.0939958	small	-0.150028	small	0.337142	small	-0.127729	small	0.0795545	small	-0.0534576	small	-0.494564	small	-0.544491	medium	-0.483592	small	-0.260569	small	-0.418286	small	-0.89181	large	-0.0183215	small	-0.211677	small	0.0815937	small
612	1494.8	2	5916.41	0.614799	medium	0.494553	small	0.480385	small	1.19227	large	0.516081	medium	0.754466	medium	0.663266	medium	0.168351	small	-0.0526264	small	-0.10945	small	0.441687	small	-0.106694	small	0.119819	small	-0.0173696	small	-0.450471	small	-0.621626	medium	-0.56624	medium	-0.32275	small	-0.499355	small	-0.967301	large	0.00182224	small	-0.230261	small	0.0976003	small
613	1495.82	2	9181.61	0.916925	large	0.674034	medium	0.67112	medium	1.71968	very large	0.746698	medium	1.0116	large	0.978704	large	0.485344	small	-0.0631315	small	-0.0795781	small	0.457952	small	-0.229717	small	0.250646	small	-0.102822	small	-0.51526	medium	-0.542406	medium	-0.754152	medium	-0.131029	small	-0.641625	medium	-1.14156	large	0.13117	small	-0.452794	small	0.149234	small
614	1497.81	3	3692.25	0.797368	medium	0.71162	medium	0.685567	medium	1.4865	very large	0.848884	large	1.01349	large	0.895399	large	0.526176	medium	0.0408402	small	0.0260156	small	0.404894	small	-0.0544226	small	0.351822	small	-0.0277529	small	-0.361546	small	-0.354359	small	-0.530423	medium	0.0273513	small	-0.50429	medium	-0.926522	large	0.0756245	small	-0.41829	small	0.0304537	small
615	1498.83	3	2053.74	0.762128	medium	0.726852	medium	0.691132	medium	1.33795	very large	0.893631	large	0.99602	large	0.853397	large	0.495251	small	0.0782732	small	0.0297001	small	0.388718	small	0.113117	small	0.305616	small	0.0406542	small	-0.306748	small	-0.345446	small	-0.276455	small	-0.031113	small	-0.370375	small	-0.77849	medium	-0.0791069	small	-0.208651	small	-0.0769838	small
616	1499.81	3	3927.13	0.733387	medium	0.778996	medium	0.755008	medium	1.46935	very large	0.988653	large	1.05756	large	0.977929	large	0.546578	medium	0.205969	small	0.129674	small	0.611495	medium	0.309554	small	0.33048	small	0.237499	small	-0.166602	small	-0.47981	small	-0.257852	small	-0.262123	small	-0.36796	small	-0.776678	medium	-0.185693	small	-0.00650452	small	-0.0872875	small
617	1501.81	4	969.029	0.844849	large	0.682473	medium	0.674304	medium	1.22767	very large	0.917562	large	1.01867	large	0.918447	large	0.382939	small	0.0435594	small	-0.0621658	small	0.364487	small	0.197516	small	0.203655	small	0.024724	small	-0.439332	small	-0.453163	small	-0.140755	small	-0.162645	small	-0.355603	small	-0.77912	medium	-0.26816	small	0.0102814	small	-0.181095	small
618	1502.81	3	1588.06	0.487268	small	0.264263	small	0.0931	small	0.311894	small	0.680264	medium	0.290395	small	0.125362	small	-0.134616	small	-0.0565332	small	-0.425955	small	-0.174637	small	0.40071	small	-0.197414	small	-0.392217	small	-0.6531	medium	-0.239346	small	0.421782	small	-0.0206555	small	-0.212661	small	-0.488015	small	-0.773369	medium	0.494278	small	-0.587856	medium
619	1503.82	4	1487.37	0.641506	medium	0.315015	small	0.187412	small	0.408148	small	0.707625	medium	0.400903	small	0.233782	small	-0.0650386	small	-0.0961591	small	-0.4715	small	-0.239627	small	0.354856	small	-0.226271	small	-0.431733	small	-0.724531	medium	-0.219056	small	0.411395	small	0.0105512	small	-0.188513	small	-0.505535	medium	-0.742803	medium	0.464377	small	-0.562497	medium
620	1504.83	2	7286.52	0.705878	medium	0.405496	small	0.322086	small	0.571187	medium	0.790008	medium	0.562421	medium	0.365234	small	0.0950174	small	-0.0424873	small	-0.336677	small	-0.129345	small	0.387547	small	-0.0918923	small	-0.344147	small	-0.587651	medium	-0.200992	small	0.396447	small	0.0313765	small	-0.204443	small	-0.448926	small	-0.704754	medium	0.428018	small	-0.565879	medium
621	1505.91	3	2039.92	1.20832	very large	0.699273	medium	0.716734	medium	1.24632	very large	0.929784	large	1.08561	large	0.998203	large	0.505085	medium	-0.214019	small	-0.303937	small	0.121129	small	-0.150511	small	-0.0668318	small	-0.266825	small	-0.569037	medium	-0.41981	small	-0.244486	small	-0.173789	small	-0.357478	small	-0.613157	medium	-0.138525	small	-0.0829239	small	-0.0928718	small
622	1506.91	3	1850.14	1.16419	large	0.759258	medium	0.777255	medium	1.32164	very large	0.993446	large	1.14121	large	1.06988	large	0.572189	medium	-0.184357	small	-0.249757	small	0.146143	small	-0.161027	small	-0.0107664	small	-0.187544	small	-0.543639	medium	-0.405823	small	-0.295122	small	-0.153196	small	-0.327228	small	-0.65179	medium	-0.0844578	small	-0.148266	small	-0.0190079	small
623	1508.8	1	11867	0.893635	large	0.654251	medium	0.63825	medium	1.11169	large	0.814223	large	0.983461	large	0.748788	medium	0.380594	small	-0.173653	small	-0.22856	small	0.176488	small	-0.174053	small	0.0856099	small	-0.227016	small	-0.565936	medium	-0.431865	small	-0.366214	small	-0.0944724	small	-0.413627	small	-0.760149	medium	-0.0593536	small	-0.26613	small	-0.0617785	small
624	1509.8	3	1616.26	0.7948	medium	0.508501	medium	0.505216	medium	0.998349	large	0.543992	medium	0.850085	large	0.555888	medium	0.212864	small	-0.214805	small	-0.254905	small	0.225832	small	-0.328364	small	0.0831474	small	-0.263241	small	-0.644376	medium	-0.507491	medium	-0.551257	medium	-0.142218	small	-0.471895	small	-0.849644	large	0.057921	small	-0.403784	small	0.0525858	small
625	1509.99	5	71.7973	0.382344	small	0.343991	small	0.333789	small	0.701497	medium	0.303674	small	0.515613	medium	0.350442	small	0.171582	small	-0.0205107	small	-0.0437654	small	0.303299	small	-0.0887551	small	0.132477	small	-0.0445626	small	-0.222232	small	-0.376013	small	-0.403209	small	-0.171963	small	-0.3589	small	-0.540147	medium	0.0450258	small	-0.224523	small	0.0459751	small
626	1510.78	2	7020.48	0.839205	large	0.570987	medium	0.582113	medium	1.03814	large	0.70854	medium	0.937604	large	0.667806	medium	0.329556	small	-0.180288	small	-0.237856	small	0.228747	small	-0.238763	small	0.0827222	small	-0.241782	small	-0.582964	medium	-0.508667	medium	-0.467349	small	-0.155626	small	-0.458147	small	-0.780025	medium	-0.00176592	small	-0.331254	small	-0.0124529	small
627	1511.89	3	3082.02	1.01501	large	0.520203	medium	0.523259	medium	1.11521	large	0.693654	medium	0.777308	medium	0.816352	large	0.452558	small	-0.465386	small	-0.479762	small	-0.209342	small	-0.424465	small	-0.169297	small	-0.448755	small	-0.778177	medium	-0.243207	small	-0.219686	small	0.0340555	small	-0.250856	small	-0.731671	medium	-0.0216054	small	-0.226807	small	-0.00811181	small
628	1511.9	3	2497.49	0.982822	large	0.503032	medium	0.505609	medium	1.0865	large	0.671335	medium	0.751139	medium	0.789612	medium	0.454233	small	-0.46499	small	-0.47529	small	-0.234791	small	-0.412944	small	-0.170671	small	-0.444682	small	-0.75902	medium	-0.208219	small	-0.180875	small	0.0571647	small	-0.219981	small	-0.704294	medium	-0.0260755	small	-0.216008	small	-0.0167791	small
629	1512.89	3	2210.96	1.0414	large	0.531886	medium	0.53348	medium	1.1622	large	0.707219	medium	0.785781	medium	0.840871	large	0.470316	small	-0.478154	small	-0.486489	small	-0.267841	small	-0.420933	small	-0.177748	small	-0.451624	small	-0.788864	medium	-0.18496	small	-0.154212	small	0.078694	small	-0.187998	small	-0.706095	medium	-0.0308845	small	-0.213966	small	-0.0123701	small
630	1516.36	1	32822	1.10471	large	0.710569	medium	0.70355	medium	1.72758	very large	0.994938	large	0.893996	large	1.2674	very large	0.649553	medium	0.0950355	small	0.0714295	small	0.608294	medium	-0.00503076	small	0.256102	small	0.297207	small	-0.465501	small	-0.443017	small	-0.586105	medium	-0.187994	small	-0.293629	small	-1.04464	large	0.0743146	small	-0.255044	small	0.290136	small
631	1517.8	2	4897.92	1.08427	large	0.743813	medium	0.744559	medium	1.8487	very large	1.01064	large	0.911072	large	1.32055	very large	0.701729	medium	0.204228	small	0.179388	small	0.840264	large	0.11765	small	0.310732	small	0.486343	small	-0.3017	small	-0.523023	medium	-0.669517	medium	-0.308426	small	-0.304898	small	-1.07723	large	0.0879475	small	-0.21731	small	0.35217	small
632	1518.82	2	6356.31	0.981878	large	0.861036	large	0.859412	large	1.89254	very large	1.09019	large	1.14284	large	1.31367	very large	0.694641	medium	0.189567	small	0.141948	small	0.716215	medium	0.177666	small	0.313266	small	0.38117	small	-0.300662	small	-0.531972	medium	-0.50528	medium	-0.315838	small	-0.305575	small	-1.04721	large	-0.0225323	small	-0.145571	small	0.19623	small
633	1519.93	2	5568.98	0.695792	medium	0.749388	medium	0.726366	medium	1.36424	very large	0.923464	large	0.951919	large	0.9904	large	0.51096	medium	0.142639	small	0.0804524	small	0.488445	small	0.1957	small	0.252221	small	0.21012	small	-0.240588	small	-0.440267	small	-0.299006	small	-0.216337	small	-0.308521	small	-0.813899	large	-0.120764	small	-0.0663328	small	0.00610433	small
634	1522.85	2	5946.86	0.591019	medium	0.676514	medium	0.646978	medium	1.02622	large	0.824981	large	0.871704	large	0.788173	medium	0.47466	small	0.130129	small	0.0932706	small	0.287958	small	0.177466	small	0.293812	small	0.138035	small	-0.180444	small	-0.196282	small	-0.120433	small	0.0341592	small	-0.163568	small	-0.552357	medium	-0.0814587	small	-0.142605	small	-0.0420534	small
635	1524.53	2	7654.19	0.411622	small	0.471103	small	0.450402	small	0.620416	medium	0.546641	medium	0.669318	medium	0.456779	small	0.300452	small	0.0608717	small	0.0421683	small	0.12344	small	0.0865458	small	0.252843	small	-0.00175689	small	-0.154795	small	-0.0853737	small	-0.0440538	small	0.14354	small	-0.146232	small	-0.336173	small	-0.04468	small	-0.189906	small	-0.0980753	small
636	1524.83	4	689.09	0.719393	medium	0.461406	small	0.455611	small	0.718287	medium	0.482502	small	0.731066	medium	0.509474	medium	0.200493	small	-0.20742	small	-0.23326	small	-0.00488869	small	-0.216781	small	0.0537938	small	-0.249804	small	-0.532228	medium	-0.225187	small	-0.203789	small	0.0547678	small	-0.242063	small	-0.52662	medium	-0.0107494	small	-0.257005	small	-0.0159174	small
637	1525.84	4	813.808	0.762025	medium	0.555897	medium	0.53807	medium	1.2255	very large	0.563597	medium	0.829858	large	0.638414	medium	0.280133	small	-0.100579	small	-0.157295	small	0.419095	small	-0.156883	small	0.126797	small	-0.156082	small	-0.479751	small	-0.59271	medium	-0.552209	medium	-0.259867	small	-0.593741	medium	-0.907691	large	0.00193593	small	-0.267753	small	0.013965	small
638	1526.83	4	812.488	0.937092	large	0.660923	medium	0.645837	medium	1.5394	very large	0.732496	medium	0.980358	large	0.839676	large	0.406822	small	-0.0871516	small	-0.140244	small	0.451763	small	-0.150773	small	0.160614	small	-0.133833	small	-0.511762	medium	-0.592563	medium	-0.586069	medium	-0.237289	small	-0.606618	medium	-0.997318	large	0.00702351	small	-0.291347	small	0.0264541	small
639	1527.83	4	796.018	1.05153	large	0.725899	medium	0.717942	medium	1.60925	very large	0.83724	large	1.07362	large	0.974491	large	0.493791	small	-0.127592	small	-0.166907	small	0.301669	small	-0.181347	small	0.124117	small	-0.131701	small	-0.544789	medium	-0.473524	small	-0.487244	small	-0.147498	small	-0.456758	small	-0.910235	large	0.0111055	small	-0.290025	small	0.05778	small
640	1528.84	4	893.261	0.908596	large	0.731689	medium	0.700693	medium	1.42222	very large	0.889094	large	1.03212	large	0.929873	large	0.416413	small	-0.0263808	small	-0.0928243	small	0.336834	small	0.0280613	small	0.178545	small	-0.00112663	small	-0.498262	small	-0.428318	small	-0.2907	small	-0.130255	small	-0.345767	small	-0.905156	large	-0.119042	small	-0.146254	small	-0.0295483	small
641	1529.81	1	10539.6	0.323673	small	0.190319	small	0.256664	small	0.627804	medium	0.294488	small	0.513238	medium	0.337999	small	-0.135772	small	-0.170588	small	-0.262733	small	-0.190584	small	-0.0048011	small	-0.095523	small	-0.195514	small	-0.311625	small	0.054628	small	0.17326	small	0.252798	small	0.0711954	small	-0.816039	large	-0.239304	small	0.0840039	small	-0.177189	small
642	1530.8	1	15194.7	0.399685	small	0.228195	small	0.314727	small	0.718943	medium	0.310492	small	0.633114	medium	0.405469	small	-0.0957947	small	-0.222128	small	-0.314859	small	-0.204323	small	-0.0505963	small	-0.101622	small	-0.242602	small	-0.384756	small	-0.012126	small	0.140657	small	0.253741	small	-0.015249	small	-0.885853	large	-0.218353	small	0.034843	small	-0.168244	small
643	1531.79	1	18092.3	0.415696	small	0.275566	small	0.374892	small	0.881622	large	0.339041	small	0.715928	medium	0.493367	small	-0.00103479	small	-0.252644	small	-0.321647	small	-0.188896	small	-0.0865807	small	-0.103428	small	-0.244799	small	-0.387865	small	-0.0640831	small	0.111201	small	0.232696	small	-0.0713984	small	-0.937736	large	-0.199868	small	-0.00105694	small	-0.155884	small
644	1532.81	3	3566.09	0.750637	medium	0.515234	medium	0.573562	medium	1.11525	large	0.569977	medium	0.986096	large	0.784681	medium	0.221625	small	-0.375022	small	-0.417645	small	-0.227772	small	-0.225826	small	-0.133772	small	-0.287646	small	-0.634276	medium	-0.146844	small	0.000674358	small	0.170735	small	-0.0545162	small	-0.868213	large	-0.122378	small	-0.133735	small	-0.0405344	small
645	1533.74	2	5648.08	0.999027	large	0.65828	medium	0.645752	medium	1.4419	very large	0.847789	large	1.01554	large	0.878174	large	0.382386	small	-0.233091	small	-0.321035	small	0.151479	small	-0.155445	small	-0.0875989	small	-0.183216	small	-0.670083	medium	-0.518762	medium	-0.316802	small	-0.255991	small	-0.354772	small	-0.955426	large	-0.149073	small	-0.0755567	small	-0.024131	small
646	1534.79	1	12224	1.00401	large	0.691106	medium	0.676684	medium	1.49295	very large	0.898338	large	1.06585	large	0.909866	large	0.419628	small	-0.219625	small	-0.308284	small	0.156991	small	-0.133496	small	-0.0638391	small	-0.188281	small	-0.641926	medium	-0.516726	medium	-0.304864	small	-0.2406	small	-0.375345	small	-0.939934	large	-0.162427	small	-0.0770837	small	-0.052639	small
647	1536.83	2	8720.56	0.76927	medium	0.726779	medium	0.658641	medium	1.20312	very large	1.02592	large	0.902196	large	0.79641	medium	0.473819	small	0.0486754	small	-0.059536	small	0.307989	small	0.248702	small	0.123879	small	0.00195401	small	-0.305054	small	-0.383667	small	-0.0548084	small	-0.18003	small	-0.316213	small	-0.649633	medium	-0.318723	small	0.124518	small	-0.252109	small
648	1537.84	4	940.732	1.04009	large	0.814448	large	0.781362	medium	1.55098	very large	1.118	large	1.1082	large	1.05998	large	0.593916	medium	0.0195918	small	-0.0672621	small	0.330015	small	0.152115	small	0.115636	small	0.0639169	small	-0.396871	small	-0.390987	small	-0.159958	small	-0.198296	small	-0.252069	small	-0.73351	medium	-0.216191	small	0.0363987	small	-0.0867747	small
649	1538.83	3	3675.88	0.535935	medium	0.699006	medium	0.653502	medium	1.10993	large	0.870048	large	0.786836	medium	0.839115	large	0.502707	medium	0.200075	small	0.14212	small	0.436155	small	0.283413	small	0.244718	small	0.252266	small	-0.0737332	small	-0.300984	small	-0.161183	small	-0.165327	small	-0.192823	small	-0.569722	medium	-0.140933	small	0.0200446	small	-0.0319035	small
650	1539.83	4	677.119	0.914727	large	0.760263	medium	0.744479	medium	1.51108	very large	0.898618	large	1.00184	large	1.03851	large	0.54271	medium	0.0237832	small	-0.0161023	small	0.385712	small	0.0119866	small	0.158172	small	0.131273	small	-0.361226	small	-0.386394	small	-0.363505	small	-0.190313	small	-0.242539	small	-0.786615	medium	-0.0274397	small	-0.144644	small	0.117078	small
651	1540.83	2	7185.41	0.404621	small	0.547344	medium	0.54269	medium	1.06316	large	0.505133	medium	0.695122	medium	0.702368	medium	0.374512	small	0.147838	small	0.138519	small	0.460153	small	0.0479984	small	0.278314	small	0.204035	small	-0.0895685	small	-0.341762	small	-0.472446	small	-0.131012	small	-0.308623	small	-0.687685	medium	0.0962298	small	-0.255665	small	0.172056	small
652	1541.83	4	937.543	0.890777	large	0.6592	medium	0.668219	medium	1.57174	very large	0.674882	medium	0.977565	large	0.968091	large	0.460559	small	-0.103518	small	-0.0919588	small	0.291317	small	-0.295058	small	0.180823	small	-0.0447452	small	-0.483441	small	-0.390881	small	-0.680972	medium	-0.0710637	small	-0.379708	small	-0.930765	large	0.183309	small	-0.454123	small	0.278226	small
653	1542.84	4	1110.5	1.00474	large	0.743628	medium	0.763888	medium	1.69789	very large	0.790593	medium	1.11142	large	1.14186	large	0.546909	medium	-0.10445	small	-0.0838615	small	0.233266	small	-0.296938	small	0.185282	small	0.0129139	small	-0.511715	medium	-0.321786	small	-0.609066	medium	-0.0215198	small	-0.243238	small	-0.888572	large	0.195621	small	-0.468482	small	0.336619	small
654	1543.85	2	9542.19	0.681828	medium	0.587973	medium	0.580215	medium	1.20975	very large	0.64753	medium	0.82119	large	0.832449	large	0.31017	small	0.0132737	small	-0.0175934	small	0.4259	small	-0.0639559	small	0.179108	small	0.111881	small	-0.376055	small	-0.461982	small	-0.51271	medium	-0.220627	small	-0.330032	small	-0.835795	large	0.0431447	small	-0.245079	small	0.182889	small
655	1544.85	4	1197.45	0.844512	large	0.623382	medium	0.616848	medium	1.20064	very large	0.696223	medium	0.933096	large	0.878964	large	0.290904	small	-0.108729	small	-0.129043	small	0.220093	small	-0.180492	small	0.149394	small	-0.0329919	small	-0.563622	medium	-0.357791	small	-0.420889	small	-0.055463	small	-0.270922	small	-0.850014	large	0.0433261	small	-0.321568	small	0.157687	small
656	1545.86	3	2206.9	0.350468	small	0.0342659	small	0.0305596	small	0.177235	small	-0.0224048	small	0.186547	small	0.0850523	small	-0.18936	small	-0.4461	small	-0.416366	small	-0.195591	small	-0.407373	small	-0.201794	small	-0.313958	small	-0.542367	medium	-0.199404	small	-0.292564	small	0.0102892	small	-0.142938	small	-0.522375	medium	0.0639404	small	-0.264016	small	0.151272	small
657	1546.86	1	64131.8	0.528129	medium	0.454226	small	0.414898	small	1.08659	large	0.650639	medium	0.573217	medium	0.567894	medium	0.263047	small	0.0592897	small	-0.0374661	small	0.541714	medium	0.128887	small	0.0475891	small	0.0912836	small	-0.290357	small	-0.6522	medium	-0.424513	small	-0.490044	small	-0.421415	small	-0.828556	large	-0.166452	small	0.0804562	small	-0.0286457	small
658	1547.86	1	95246.4	0.433077	small	0.126654	small	0.0598795	small	0.58497	medium	0.161003	small	0.164392	small	0.150789	small	-0.149497	small	-0.408603	small	-0.455594	small	-0.00493605	small	-0.316243	small	-0.306525	small	-0.306401	small	-0.50202	medium	-0.569053	medium	-0.419337	small	-0.403541	small	-0.392607	small	-0.731158	medium	-0.098165	small	-0.0052933	small	-0.000972681	small
659	1548.87	2	6204.64	0.318472	small	-0.313825	small	-0.293761	small	-0.0542312	small	-0.396363	small	-0.160775	small	-0.273049	small	-0.370692	small	-0.669077	medium	-0.597794	medium	-0.293577	small	-0.533466	medium	-0.397395	small	-0.462616	small	-0.520605	medium	-0.251578	small	-0.419313	small	-0.113124	small	-0.246266	small	-0.373995	small	0.137279	small	-0.265705	small	0.142545	small
660	1549.84	1	18093.5	0.266436	small	-0.440671	small	-0.360181	small	-0.269074	small	-0.558817	medium	-0.21222	small	-0.372272	small	-0.38948	small	-0.736777	medium	-0.62247	medium	-0.408581	small	-0.656134	medium	-0.413068	small	-0.527933	medium	-0.544534	medium	-0.046452	small	-0.40945	small	0.0742927	small	-0.108145	small	-0.128692	small	0.268027	small	-0.403213	small	0.258492	small
661	1550.84	3	2499.78	0.329302	small	-0.203473	small	-0.102287	small	-0.164647	small	-0.477603	small	-0.0391593	small	-0.037537	small	-0.209649	small	-0.611519	medium	-0.478981	small	-0.432478	small	-0.742044	medium	-0.358183	small	-0.372991	small	-0.510968	medium	0.0787286	small	-0.441732	small	0.136047	small	0.162564	small	-0.0486188	small	0.395964	small	-0.486807	small	0.562473	medium
662	1553.83	1	12289.3	0.875688	large	0.515866	medium	0.575804	medium	0.856918	large	0.479746	small	0.860342	large	0.811897	large	0.287189	small	-0.252972	small	-0.261157	small	-0.173415	small	-0.254203	small	-0.019898	small	-0.163143	small	-0.599273	medium	-0.0779695	small	-0.0996521	small	0.153563	small	0.0233192	small	-0.491455	small	0.0415859	small	-0.235629	small	0.126216	small
663	1554.83	2	6627.72	0.834909	large	0.919724	large	0.903451	large	1.62217	very large	1.19356	large	1.24776	very large	1.27374	very large	0.744456	medium	0.0132892	small	0.024951	small	0.120847	small	-0.0693804	small	0.234572	small	0.151897	small	-0.348673	small	-0.117526	small	-0.292761	small	0.135403	small	0.034348	small	-0.717136	medium	0.105571	small	-0.375867	small	0.288414	small
664	1555.85	3	2543.22	0.917596	large	0.963307	large	0.946052	large	1.76129	very large	1.2299	very large	1.27479	very large	1.36366	very large	0.78829	medium	0.0747746	small	0.0640657	small	0.226	small	0.0354527	small	0.267479	small	0.219535	small	-0.335911	small	-0.178593	small	-0.249842	small	0.062434	small	-0.00857509	small	-0.770824	medium	0.0327415	small	-0.27317	small	0.220497	small
665	1556.85	3	3051.6	0.661587	medium	0.847428	large	0.810937	large	1.26483	very large	1.00022	large	1.06654	large	0.991761	large	0.613003	medium	0.158834	small	0.121828	small	0.313892	small	0.182363	small	0.325615	small	0.180835	small	-0.169518	small	-0.221729	small	-0.170412	small	0.0330358	small	-0.166272	small	-0.638325	medium	-0.0650999	small	-0.18276	small	0.00105058	small
666	1557.85	3	2099.96	0.536141	medium	0.670691	medium	0.627017	medium	0.887485	large	0.756285	medium	0.855218	large	0.663354	medium	0.434909	small	0.0819587	small	0.0489681	small	0.208398	small	0.112911	small	0.270076	small	0.0304278	small	-0.173243	small	-0.185755	small	-0.12956	small	0.0795355	small	-0.230031	small	-0.487745	small	-0.0695726	small	-0.195302	small	-0.098433	small
667	1558.85	4	1056	0.537482	medium	0.576393	medium	0.533732	medium	0.764151	medium	0.664752	medium	0.78209	medium	0.510631	medium	0.362668	small	-0.000910236	small	-0.0336664	small	0.125024	small	0.0445515	small	0.205462	small	-0.0901267	small	-0.223163	small	-0.176704	small	-0.102163	small	0.0912878	small	-0.259118	small	-0.417759	small	-0.0840967	small	-0.187387	small	-0.157079	small
668	1561.86	1	20083.8	0.773312	medium	0.619969	medium	0.607627	medium	1.22403	very large	0.769627	medium	0.967025	large	0.767192	medium	0.355201	small	-0.0218145	small	-0.0700522	small	0.311178	small	-0.0174737	small	0.190275	small	0.00995156	small	-0.467473	small	-0.401416	small	-0.336356	small	-0.11811	small	-0.294145	small	-0.851914	large	-0.0531807	small	-0.210792	small	0.0272907	small
669	1562.86	1	128771	0.511864	medium	0.431479	small	0.394964	small	1.00648	large	0.577323	medium	0.581126	medium	0.546573	medium	0.178248	small	0.0360379	small	-0.0440059	small	0.473929	small	0.0819269	small	0.0841047	small	0.0839054	small	-0.350792	small	-0.560922	medium	-0.390233	small	-0.380608	small	-0.359924	small	-0.82237	large	-0.124263	small	-0.00262538	small	0.00664447	small
670	1563.92	2	6202.03	0.544735	medium	0.434759	small	0.402521	small	1.01819	large	0.576147	medium	0.59102	medium	0.559056	medium	0.185676	small	0.0103725	small	-0.074272	small	0.458217	small	0.0500773	small	0.0503674	small	0.0562329	small	-0.370396	small	-0.586681	medium	-0.404817	small	-0.404134	small	-0.379058	small	-0.81704	large	-0.123729	small	0.000302895	small	0.0080219	small
671	1564.87	2	8816.94	0.695966	medium	0.539129	medium	0.516109	medium	1.15794	large	0.69538	medium	0.771503	medium	0.706709	medium	0.267567	small	-0.0177138	small	-0.0973665	small	0.411203	small	0.019457	small	0.0663557	small	0.0424027	small	-0.435487	small	-0.550144	medium	-0.38687	small	-0.347065	small	-0.354396	small	-0.852597	large	-0.116178	small	-0.0456981	small	0.0229735	small
672	1565.84	2	7755.14	0.860545	large	0.681577	medium	0.662459	medium	1.38531	very large	0.883361	large	1.01689	large	0.88514	large	0.393738	small	-0.0321886	small	-0.11164	small	0.380105	small	0.0166802	small	0.114935	small	0.00906496	small	-0.482598	small	-0.533538	medium	-0.368385	small	-0.274187	small	-0.374497	small	-0.908718	large	-0.129411	small	-0.0989096	small	-0.00768708	small
673	1567.84	1	10870.9	1.17771	large	0.810914	large	0.799045	medium	1.63021	very large	1.01908	large	1.2044	very large	1.1184	large	0.568284	medium	-0.208431	small	-0.253932	small	0.0843406	small	-0.180721	small	0.0821873	small	-0.229181	small	-0.661488	medium	-0.352927	small	-0.279537	small	0.00318379	small	-0.352673	small	-0.865632	large	-0.0695644	small	-0.257213	small	-0.0382675	small
674	1568.85	3	2099.79	1.03964	large	0.705072	medium	0.710221	medium	1.38021	very large	0.847532	large	1.09937	large	0.945438	large	0.464243	small	-0.146326	small	-0.199988	small	0.168901	small	-0.126784	small	0.0778739	small	-0.143135	small	-0.554506	medium	-0.380943	small	-0.287122	small	-0.0880329	small	-0.321289	small	-0.753452	medium	-0.0651049	small	-0.199772	small	-0.00722715	small
675	1570.9	2	7454.09	0.908036	large	0.730294	medium	0.768078	medium	1.69663	very large	0.83524	large	1.1199	large	1.11064	large	0.527474	medium	-0.0867197	small	-0.139208	small	0.514722	medium	-0.225012	small	0.0913061	small	-0.0201601	small	-0.492163	small	-0.794395	medium	-0.824836	large	-0.454864	small	-0.609812	medium	-1.12903	large	0.0996385	small	-0.346251	small	0.24102	small
676	1571.91	1	11739.8	0.678995	medium	0.574911	medium	0.659143	medium	1.35464	very large	0.662112	medium	0.936711	large	1.00605	large	0.445066	small	-0.0883828	small	-0.133488	small	0.490241	small	-0.292034	small	0.0631785	small	-0.0260762	small	-0.418437	small	-0.850209	large	-0.895057	large	-0.483851	small	-0.617131	medium	-1.0176	large	0.210173	small	-0.437639	small	0.383845	small
677	1574.88	2	7244.07	0.480376	small	0.478944	small	0.447916	small	0.940855	large	0.512786	medium	0.597996	medium	0.632729	medium	0.206234	small	0.0179416	small	-0.0231676	small	0.349626	small	0.00870371	small	0.128997	small	0.0832838	small	-0.292494	small	-0.39935	small	-0.362805	small	-0.195615	small	-0.313735	small	-0.72694	medium	-0.0327244	small	-0.126017	small	0.0778959	small
678	1576.88	4	1309.17	0.515107	medium	0.264976	small	0.294577	small	0.444321	small	0.283994	small	0.51079	medium	0.438814	small	-0.0746755	small	-0.134131	small	-0.186658	small	-0.139912	small	-0.0574499	small	0.0214384	small	-0.0568305	small	-0.619714	medium	-0.051355	small	0.0334532	small	0.150924	small	0.0758911	small	-0.71465	medium	-0.081998	small	-0.0713307	small	0.0157416	small
679	1577.87	2	8423.43	0.475441	small	0.268619	small	0.299168	small	0.388362	small	0.272515	small	0.490653	small	0.494988	small	-0.0589665	small	-0.113902	small	-0.138328	small	-0.129331	small	-0.0723368	small	0.0512079	small	-8.34089e-05	small	-0.532386	medium	-0.0108339	small	0.0227693	small	0.16458	small	0.136072	small	-0.490095	small	-0.036498	small	-0.109606	small	0.0734127	small
680	1580.83	3	3655.05	0.796127	medium	0.540821	medium	0.534761	medium	1.10159	large	0.721113	medium	0.848179	large	0.700556	medium	0.29515	small	-0.142216	small	-0.232308	small	0.239676	small	-0.0894211	small	-0.0474633	small	-0.105681	small	-0.534929	medium	-0.524395	medium	-0.331227	small	-0.302235	small	-0.342078	small	-0.791481	medium	-0.136264	small	-0.0474111	small	-0.0175392	small
681	1581.83	3	3117.92	0.836036	large	0.584455	medium	0.581336	medium	1.15669	large	0.774464	medium	0.901681	large	0.769415	medium	0.346081	small	-0.138271	small	-0.224447	small	0.229324	small	-0.0822314	small	-0.0379034	small	-0.0960488	small	-0.528968	medium	-0.503846	medium	-0.316011	small	-0.283115	small	-0.327724	small	-0.786045	medium	-0.136733	small	-0.0492106	small	-0.0142614	small
682	1582.83	3	1856.41	1.02798	large	0.704137	medium	0.716025	medium	1.32275	very large	0.859703	large	1.13396	large	0.970741	large	0.445595	small	-0.248429	small	-0.277498	small	0.0490311	small	-0.266621	small	0.0313707	small	-0.20845	small	-0.657115	medium	-0.345731	small	-0.337288	small	-0.0196565	small	-0.277307	small	-0.805401	large	0.000475279	small	-0.312386	small	0.0684433	small
683	1583.83	2	8103.74	0.845928	large	0.574649	medium	0.57846	medium	1.01753	large	0.695856	medium	0.92362	large	0.753192	medium	0.315494	small	-0.158193	small	-0.197293	small	0.0699631	small	-0.142101	small	0.0586828	small	-0.132929	small	-0.530466	medium	-0.275574	small	-0.210655	small	-0.0135678	small	-0.205509	small	-0.627055	medium	-0.048674	small	-0.202136	small	0.0135641	small
684	1584.84	3	1604.54	0.764214	medium	0.521615	medium	0.515411	medium	0.935833	large	0.626412	medium	0.808699	large	0.665615	medium	0.2642	small	-0.0984279	small	-0.154716	small	0.126652	small	-0.0422177	small	0.0578166	small	-0.0721779	small	-0.462713	small	-0.282207	small	-0.151771	small	-0.0680277	small	-0.19157	small	-0.583599	medium	-0.103101	small	-0.0939292	small	-0.024088	small
685	1585.85	2	7345.22	0.608728	medium	0.376168	small	0.33955	small	0.909383	large	0.511084	medium	0.518777	medium	0.465392	small	0.164878	small	-0.102069	small	-0.191675	small	0.27049	small	-0.0369393	small	-0.105578	small	-0.0648522	small	-0.424392	small	-0.48604	small	-0.286472	small	-0.37333	small	-0.302794	small	-0.683121	medium	-0.145817	small	0.0601132	small	-0.027239	small
686	1586.85	1	24039.9	0.65311	medium	0.416524	small	0.388428	small	0.960836	large	0.563259	medium	0.606387	medium	0.520837	medium	0.190514	small	-0.0957482	small	-0.189055	small	0.307767	small	-0.0436578	small	-0.0666149	small	-0.0692003	small	-0.44683	small	-0.53321	medium	-0.335102	small	-0.37096	small	-0.348188	small	-0.722616	medium	-0.138714	small	0.0190033	small	-0.02553	small
687	1588.86	4	1253.37	0.894668	large	0.616146	medium	0.607377	medium	1.30443	very large	0.748917	medium	0.926281	large	0.806597	large	0.362509	small	-0.110327	small	-0.178637	small	0.328107	small	-0.113619	small	0.0452779	small	-0.0842051	small	-0.517666	medium	-0.53517	medium	-0.432351	small	-0.277091	small	-0.407561	small	-0.850941	large	-0.0617083	small	-0.156209	small	0.0306048	small
688	1589.89	4	1113.3	1.11702	large	0.824762	large	0.834197	large	1.77664	very large	0.975424	large	1.21466	very large	1.20892	very large	0.615244	medium	-0.0619858	small	-0.0903956	small	0.33121	small	-0.131428	small	0.163248	small	0.0385564	small	-0.518814	medium	-0.427807	small	-0.471345	small	-0.145544	small	-0.301709	small	-0.925323	large	0.0378636	small	-0.288652	small	0.173529	small
689	1591.89	2	7813.82	0.879826	large	0.82309	large	0.821105	large	1.50792	very large	0.994445	large	1.17864	large	1.09699	large	0.616506	medium	0.0526161	small	0.0227945	small	0.330153	small	0.0315268	small	0.266582	small	0.109024	small	-0.333477	small	-0.328018	small	-0.325784	small	-0.0530602	small	-0.24319	small	-0.757001	medium	-0.00852937	small	-0.250987	small	0.0826907	small
690	1592.9	2	9532.98	0.982212	large	0.46987	small	0.519849	medium	0.95761	large	0.338981	small	0.9585	large	0.613346	medium	0.22835	small	-0.454876	small	-0.388013	small	-0.225641	small	-0.653659	medium	-0.0216564	small	-0.406053	small	-0.750966	medium	-0.147121	small	-0.485846	small	0.202499	small	-0.187543	small	-0.620792	medium	0.264675	small	-0.629042	medium	0.266505	small
691	1595.89	1	12022.8	0.919735	large	0.516706	medium	0.553966	medium	0.78686	medium	0.465858	small	0.997895	large	0.544335	medium	0.35037	small	-0.349664	small	-0.287386	small	-0.274416	small	-0.501679	medium	0.0975256	small	-0.42412	small	-0.580309	medium	-0.00408259	small	-0.244931	small	0.357666	small	-0.155683	small	-0.342578	small	0.19835	small	-0.589467	medium	0.0811969	small
692	1597.89	3	2288.5	0.908455	large	0.765689	medium	0.736691	medium	1.29482	very large	0.959975	large	1.12075	large	0.883258	large	0.531537	medium	-0.0650774	small	-0.0987817	small	0.107259	small	-0.0259128	small	0.214725	small	-0.124137	small	-0.421246	small	-0.214442	small	-0.147354	small	0.118472	small	-0.264495	small	-0.620051	medium	-0.0757549	small	-0.252754	small	-0.105536	small
693	1600.87	2	7675.77	0.739773	medium	0.721353	medium	0.664683	medium	1.25303	very large	0.935305	large	1.01622	large	0.765686	medium	0.436661	small	-0.0135296	small	-0.0738873	small	0.201744	small	0.0758566	small	0.23283	small	-0.106521	small	-0.381511	small	-0.305433	small	-0.148657	small	0.050044	small	-0.388212	small	-0.76124	medium	-0.160592	small	-0.18	small	-0.209377	small
694	1601.88	4	1404.78	1.02295	large	0.612457	medium	0.589364	medium	1.69807	very large	0.952212	large	0.90588	large	1.16444	large	0.478856	small	-0.135877	small	-0.109445	small	0.0145436	small	-0.287184	small	0.250479	small	-0.181772	small	-0.711293	medium	-0.121504	small	-0.378734	small	0.22141	small	-0.250002	small	-1.08863	large	0.111509	small	-0.453867	small	0.136062	small
695	1604.91	2	9058.22	0.709234	medium	0.72866	medium	0.651331	medium	1.38266	very large	1.06346	large	0.919378	large	0.970084	large	0.365412	small	0.0862811	small	-0.00714118	small	0.285638	small	0.270084	small	0.249224	small	0.0857048	small	-0.430959	small	-0.302028	small	2.88887e-05	small	0.0110965	small	-0.253149	small	-1.00913	large	-0.291328	small	-0.0111811	small	-0.216914	small
696	1606.89	4	704.454	0.874907	large	0.687918	medium	0.638981	medium	1.22502	very large	0.944773	large	0.976398	large	0.87515	large	0.31429	small	-0.0656395	small	-0.160301	small	0.11585	small	0.113902	small	0.11601	small	-0.0607082	small	-0.573826	medium	-0.285826	small	0.00825374	small	0.00874095	small	-0.192742	small	-0.814852	large	-0.277854	small	-0.000269887	small	-0.176453	small
697	1607.87	4	1350.36	0.954363	large	0.411353	small	0.390277	small	1.72998	very large	0.974604	large	0.859675	large	0.574517	medium	0.452772	small	0.164627	small	0.167082	small	0.601879	medium	0.195725	small	0.338776	small	0.366756	small	-0.503278	medium	-0.0242795	small	-0.322681	small	-0.0407044	small	0.180179	small	-1.14857	large	0.100188	small	-0.193139	small	0.315284	small
698	1608.87	4	1189.77	0.969065	large	0.437551	small	0.415168	small	1.74088	very large	0.938347	large	0.894724	large	0.603037	medium	0.463973	small	0.158769	small	0.162002	small	0.618328	medium	0.141839	small	0.325266	small	0.369101	small	-0.497405	small	-0.0545332	small	-0.392473	small	-0.085794	small	0.163558	small	-1.14501	large	0.10893	small	-0.209655	small	0.327666	small
699	1609.88	4	871.535	0.95003	large	0.571234	medium	0.546352	medium	1.52426	very large	0.840518	large	0.989947	large	0.766833	medium	0.37364	small	0.0832946	small	0.0866428	small	0.384293	small	-0.00779863	small	0.247059	small	0.326626	small	-0.557812	medium	-0.134669	small	-0.354872	small	-0.0615769	small	0.113147	small	-1.0008	large	0.0904763	small	-0.241851	small	0.326789	small
700	1610.88	4	891.298	1.086	large	0.65416	medium	0.654218	medium	1.51424	very large	0.795106	medium	0.932427	large	1.09208	large	0.467634	small	-0.0265506	small	-0.0141327	small	0.251735	small	-0.178652	small	0.273457	small	0.0817164	small	-0.595262	medium	-0.202348	small	-0.408247	small	0.0891132	small	-0.154946	small	-0.881777	large	0.122721	small	-0.387924	small	0.246984	small
701	1611.89	4	715.336	0.999888	large	0.469564	small	0.485262	small	1.0519	large	0.455035	small	0.751263	medium	0.758406	medium	0.246148	small	-0.215441	small	-0.186696	small	0.000519126	small	-0.425803	small	0.117796	small	-0.229486	small	-0.675394	medium	-0.178913	small	-0.406883	small	0.102616	small	-0.221957	small	-0.667212	medium	0.155068	small	-0.405783	small	0.212172	small
702	1615.91	2	9422.6	1.00975	large	0.664266	medium	0.647492	medium	1.62322	very large	0.814039	large	0.957106	large	1.05426	large	0.407482	small	-0.0920508	small	-0.12028	small	0.290058	small	-0.151128	small	0.192268	small	-0.0842417	small	-0.618606	medium	-0.389402	small	-0.442979	small	-0.0369835	small	-0.41455	small	-1.03494	large	0.0190795	small	-0.312772	small	0.0798344	small
703	1616.9	1	10570.8	0.876065	large	0.551521	medium	0.524646	medium	1.33505	very large	0.653253	medium	0.808822	large	0.802142	large	0.224478	small	-0.135199	small	-0.176818	small	0.246331	small	-0.157147	small	0.112499	small	-0.134201	small	-0.625836	medium	-0.409706	small	-0.395101	small	-0.084852	small	-0.410618	small	-0.969067	large	-0.0249666	small	-0.240904	small	0.0369075	small
704	1617.93	4	998.617	1.01448	large	0.600291	medium	0.599176	medium	1.43987	very large	0.640929	medium	0.971943	large	0.861865	large	0.285966	small	-0.244051	small	-0.237376	small	0.114629	small	-0.393778	small	0.0776828	small	-0.176774	small	-0.701236	medium	-0.354715	small	-0.560673	medium	-0.0233182	small	-0.308371	small	-0.943579	large	0.125806	small	-0.4322	small	0.22078	small
705	1618.92	4	1222.5	0.949609	large	0.595252	medium	0.598475	medium	1.36319	very large	0.6082	medium	0.918654	large	0.874275	large	0.306625	small	-0.215496	small	-0.20062	small	0.121063	small	-0.381914	small	0.0694443	small	-0.109222	small	-0.630434	medium	-0.325079	small	-0.567498	medium	-0.0374098	small	-0.244073	small	-0.873662	large	0.150652	small	-0.416559	small	0.280043	small
706	1620.88	1	19922.4	0.968563	large	0.707145	medium	0.666722	medium	1.65209	very large	1.0432	large	0.967464	large	0.992411	large	0.428973	small	0.0496767	small	-0.0778305	small	0.615638	medium	0.189774	small	0.0914244	small	0.125024	small	-0.5261	medium	-0.713578	medium	-0.393819	small	-0.484899	small	-0.453148	small	-1.12716	large	-0.262075	small	0.0936968	small	-0.0616825	small
707	1621.08	5	158.747	0.660541	medium	0.551446	medium	0.498084	small	1.25417	very large	0.737806	medium	0.681976	medium	0.749938	medium	0.238019	small	0.036765	small	-0.0586378	small	0.506012	medium	0.132889	small	0.083622	small	0.109955	small	-0.40794	small	-0.566052	medium	-0.336956	small	-0.374546	small	-0.37846	small	-0.930872	large	-0.188094	small	0.0447131	small	-0.0267256	small
708	1621.87	1	12276	1.09697	large	0.822379	large	0.780327	medium	2.06919	very large	1.19944	large	1.07744	large	1.25054	very large	0.562467	medium	0.143761	small	0.00362865	small	0.721325	medium	0.360916	small	0.180586	small	0.264302	small	-0.530524	medium	-0.671123	medium	-0.242649	small	-0.438383	small	-0.401414	small	-1.30017	very large	-0.357958	small	0.172398	small	-0.118719	small
709	1622.87	3	3176.1	1.16572	large	0.862421	large	0.838908	large	2.16025	very large	1.17963	large	1.17379	large	1.32209	very large	0.620468	medium	0.111182	small	-0.00925941	small	0.604787	medium	0.292183	small	0.18756	small	0.245778	small	-0.552819	medium	-0.564751	medium	-0.195828	small	-0.33231	small	-0.310283	small	-1.25216	very large	-0.304586	small	0.108543	small	-0.0731951	small
710	1623.87	2	4055.49	1.10205	large	0.786543	medium	0.744982	medium	1.72511	very large	1.09463	large	1.10702	large	1.04213	large	0.556329	medium	-0.00179658	small	-0.0704628	small	0.34613	small	0.0812631	small	0.0993339	small	0.155712	small	-0.584251	medium	-0.381239	small	-0.241065	small	-0.216476	small	-0.131368	small	-1.02581	large	-0.144079	small	-0.0184087	small	0.0798743	small
711	1624.89	3	3057.16	0.96737	large	0.764531	medium	0.756058	medium	1.55997	very large	1.01687	large	1.18252	large	1.03872	large	0.561961	medium	-0.19633	small	-0.196353	small	0.0386401	small	-0.24624	small	0.0726771	small	-0.0712494	small	-0.618607	medium	-0.258741	small	-0.360962	small	0.0372363	small	-0.124723	small	-0.935071	large	0.0523531	small	-0.356439	small	0.190543	small
712	1625.9	3	2027.55	0.877486	large	0.77636	medium	0.775113	medium	1.53863	very large	0.964417	large	1.16363	large	1.09425	large	0.54784	medium	-0.153687	small	-0.156754	small	0.105672	small	-0.212156	small	0.114517	small	-0.0572193	small	-0.538065	medium	-0.309503	small	-0.422612	small	0.00929752	small	-0.206183	small	-0.938974	large	0.0689086	small	-0.378564	small	0.192269	small
713	1626.85	2	7364.05	0.797741	medium	0.526401	medium	0.532403	medium	0.99248	large	0.553092	medium	0.842116	large	0.7189	medium	0.214724	small	-0.247045	small	-0.258262	small	0.0473989	small	-0.309537	small	0.00695548	small	-0.170723	small	-0.611484	medium	-0.324312	small	-0.388518	small	-0.0419905	small	-0.23525	small	-0.758003	medium	0.0625015	small	-0.328312	small	0.156631	small
714	1627.88	4	1143.91	0.824119	large	0.438554	small	0.441621	small	0.840294	large	0.444871	small	0.733094	medium	0.57926	medium	0.126882	small	-0.304283	small	-0.335902	small	-0.00551708	small	-0.33974	small	-0.0702704	small	-0.258688	small	-0.686059	medium	-0.326264	small	-0.320576	small	-0.060677	small	-0.244283	small	-0.684747	medium	0.0209347	small	-0.263711	small	0.0945683	small
715	1629.91	1	176337	-0.0706871	small	-0.980403	large	-0.780586	medium	-0.729279	medium	-0.876593	large	-0.696971	medium	-0.683947	medium	-0.520158	medium	-0.787784	medium	-0.610035	medium	-0.544776	medium	-0.680601	medium	-0.525387	medium	-0.516496	medium	-0.376603	small	0.394149	small	-0.360933	small	0.448343	small	0.340761	small	0.530643	medium	0.472308	small	-0.62306	medium	0.471134	small
716	1630.07	3	2127.87	0.0998628	small	-0.733354	medium	-0.565609	medium	-0.611892	medium	-0.749662	medium	-0.550466	medium	-0.540268	medium	-0.363545	small	-0.722558	medium	-0.566182	medium	-0.482478	small	-0.608125	medium	-0.476702	small	-0.473237	small	-0.361494	small	0.311986	small	-0.373541	small	0.389261	small	0.317363	small	0.379164	small	0.392618	small	-0.575711	medium	0.466738	small
717	1630.91	1	143096	-0.0716343	small	-0.983834	large	-0.783241	medium	-0.73222	medium	-0.87873	large	-0.698854	medium	-0.686501	medium	-0.521225	medium	-0.786887	medium	-0.609105	medium	-0.544332	medium	-0.678847	medium	-0.524021	medium	-0.515865	medium	-0.375104	small	0.399109	small	-0.354244	small	0.45679	small	0.342301	small	0.538708	medium	0.474864	small	-0.628235	medium	0.468913	small
718	1631.91	1	38357.3	-0.0183339	small	-0.926705	large	-0.72994	medium	-0.705722	medium	-0.855244	large	-0.650324	medium	-0.649116	medium	-0.488574	small	-0.789487	medium	-0.611348	medium	-0.540022	medium	-0.679009	medium	-0.512659	medium	-0.514475	medium	-0.386423	small	0.398029	small	-0.374724	small	0.473964	small	0.341807	small	0.521115	medium	0.489003	small	-0.673277	medium	0.488641	small
719	1632.06	4	1319.9	0.060128	small	-0.821802	large	-0.632678	medium	-0.680472	medium	-0.83666	large	-0.594412	medium	-0.597244	medium	-0.415356	small	-0.764365	medium	-0.590673	medium	-0.526972	medium	-0.668592	medium	-0.496768	small	-0.502085	medium	-0.3763	small	0.370194	small	-0.349661	small	0.446975	small	0.342157	small	0.461742	small	0.470111	small	-0.657656	medium	0.509336	medium
720	1632.91	2	4687.1	0.0863239	small	-0.779874	medium	-0.592727	medium	-0.644405	medium	-0.855499	large	-0.490318	small	-0.582637	medium	-0.43731	small	-0.83754	large	-0.645222	medium	-0.592102	medium	-0.801269	large	-0.500903	medium	-0.577834	medium	-0.460588	small	0.330651	small	-0.409613	small	0.448848	small	0.24529	small	0.382813	small	0.528252	medium	-0.779613	medium	0.520342	medium
721	1633.9	3	2259.83	0.387262	small	-0.197062	small	-0.104139	small	-0.176371	small	-0.480159	small	0.112815	small	-0.236323	small	-0.20146	small	-0.633073	medium	-0.512908	medium	-0.509839	medium	-0.839532	large	-0.263968	small	-0.611827	medium	-0.564458	medium	0.0741016	small	-0.344705	small	0.274282	small	-0.0544418	small	-0.0257764	small	0.351368	small	-0.590555	medium	0.283282	small
722	1634.89	2	7406.27	0.43602	small	-0.036896	small	0.00452196	small	0.134008	small	-0.240896	small	0.281225	small	-0.201642	small	-0.113921	small	-0.484072	small	-0.428437	small	-0.276846	small	-0.647085	medium	-0.128908	small	-0.617354	medium	-0.526579	medium	-0.121512	small	-0.377693	small	0.140763	small	-0.345918	small	-0.242486	small	0.22138	small	-0.485956	small	0.0480771	small
723	1635.9	4	975.827	0.870486	large	0.422862	small	0.420778	small	1.03216	large	0.392169	small	0.730526	medium	0.50597	medium	0.154803	small	-0.296912	small	-0.322546	small	0.12758	small	-0.415856	small	0.00656709	small	-0.386494	small	-0.691057	medium	-0.445822	small	-0.521702	medium	-0.100331	small	-0.510534	medium	-0.817785	large	0.0795963	small	-0.361732	small	0.0594197	small
724	1636.9	4	915.98	0.86867	large	0.439291	small	0.446408	small	0.923434	large	0.384393	small	0.773837	medium	0.526576	medium	0.162549	small	-0.337924	small	-0.336857	small	-0.0137078	small	-0.458989	small	-0.0105396	small	-0.364106	small	-0.690601	medium	-0.322534	small	-0.452408	small	0.00222043	small	-0.35853	small	-0.714204	medium	0.111506	small	-0.407365	small	0.112603	small
725	1637.89	4	800.799	0.976915	large	0.586132	medium	0.582748	medium	1.13784	large	0.637768	medium	0.925407	large	0.744629	medium	0.307801	small	-0.335564	small	-0.351234	small	-0.0362467	small	-0.369475	small	-0.0523434	small	-0.313218	small	-0.678967	medium	-0.323717	small	-0.359303	small	-0.0169291	small	-0.301243	small	-0.736865	medium	0.0301568	small	-0.315012	small	0.0694388	small
726	1641.9	1	12416	1.14348	large	0.646708	medium	0.663935	medium	0.998107	large	0.718943	medium	0.958885	large	0.774269	medium	0.536829	medium	-0.404095	small	-0.395712	small	-0.221901	small	-0.459373	small	-0.127698	small	-0.424974	small	-0.620877	medium	-0.152307	small	-0.223963	small	0.0901935	small	-0.188199	small	-0.395939	small	0.0637653	small	-0.309009	small	0.0389752	small
727	1642.9	4	1222.96	1.24823	very large	0.735146	medium	0.761418	medium	1.36476	very large	0.891797	large	1.07203	large	1.04301	large	0.609781	medium	-0.233566	small	-0.283522	small	0.12321	small	-0.266271	small	-0.0995673	small	-0.210163	small	-0.537103	medium	-0.403989	small	-0.360345	small	-0.205926	small	-0.314667	small	-0.611152	medium	-0.0130782	small	-0.158746	small	0.065472	small
728	1643.9	4	1074.21	1.06576	large	0.613	medium	0.611683	medium	1.24656	very large	0.702081	medium	0.91703	large	0.796359	medium	0.413528	small	-0.238302	small	-0.28059	small	0.107084	small	-0.267602	small	-0.0340684	small	-0.260434	small	-0.573975	medium	-0.383475	small	-0.355704	small	-0.127617	small	-0.359478	small	-0.666263	medium	-0.0109997	small	-0.213712	small	0.0219276	small
729	1644.89	1	12289.2	0.667037	medium	0.494275	small	0.461395	small	0.800819	large	0.81998	large	0.724499	medium	0.406634	small	0.331482	small	-0.146891	small	-0.311835	small	0.171061	small	0.0544171	small	-0.0837932	small	-0.354117	small	-0.393178	small	-0.540514	medium	-0.14087	small	-0.264757	small	-0.500211	medium	-0.534597	medium	-0.406152	small	0.157934	small	-0.468787	small
730	1646.89	3	1606.26	0.541849	medium	0.348884	small	0.451533	small	0.67455	medium	0.91399	large	0.757597	medium	0.45331	small	0.218947	small	-0.198122	small	-0.478174	small	0.196122	small	0.0201399	small	-0.254027	small	-0.370177	small	-0.440002	small	-0.753401	medium	-0.217737	small	-0.422223	small	-0.507605	medium	-0.564209	medium	-0.763263	medium	0.443891	small	-0.642117	medium
731	1647.9	4	1491.53	0.58228	medium	0.42684	small	0.606231	medium	0.740353	medium	1.022	large	0.933927	large	0.676816	medium	0.366318	small	-0.165872	small	-0.440456	small	0.214973	small	0.070098	small	-0.224964	small	-0.332409	small	-0.430361	small	-0.76471	medium	-0.200202	small	-0.429187	small	-0.510333	medium	-0.588614	medium	-0.772799	medium	0.457684	small	-0.629732	medium
732	1648.9	2	8658.19	0.542024	medium	0.504745	medium	0.562698	medium	0.765219	medium	1.04999	large	0.837656	large	0.545359	medium	0.389673	small	-0.0855699	small	-0.296367	small	0.217458	small	0.162244	small	-0.101156	small	-0.261551	small	-0.333766	small	-0.664131	medium	-0.127806	small	-0.356411	small	-0.49111	small	-0.556369	medium	-0.682694	medium	0.393712	small	-0.638026	medium
733	1649.9	4	680.18	0.83247	large	0.538506	medium	0.503154	medium	0.903081	large	0.764061	medium	0.758275	medium	0.668386	medium	0.233434	small	-0.238262	small	-0.348775	small	0.0280948	small	-0.0806282	small	-0.137859	small	-0.244738	small	-0.600239	medium	-0.385954	small	-0.105947	small	-0.163556	small	-0.272246	small	-0.636141	medium	-0.26056	small	0.055692	small	-0.163392	small
734	1650.9	2	4319.75	0.570856	medium	0.370705	small	0.36667	small	0.42141	small	0.406415	small	0.630677	medium	0.374816	small	0.148273	small	-0.167413	small	-0.171694	small	-0.160396	small	-0.154324	small	0.0887206	small	-0.19978	small	-0.424377	small	-0.0138258	small	0.00494838	small	0.232248	small	-0.0374057	small	-0.270162	small	-0.0186154	small	-0.233683	small	-0.0413404	small
735	1651.91	4	1458.16	0.930985	large	0.407607	small	0.467605	small	0.534718	medium	0.243854	small	0.857893	large	0.580833	medium	0.110597	small	-0.476801	small	-0.37712	small	-0.461381	small	-0.690794	medium	-0.00439786	small	-0.391234	small	-0.798298	medium	0.0890533	small	-0.247393	small	0.414368	small	0.103857	small	-0.391228	small	0.278551	small	-0.634975	medium	0.33034	small
736	1652.92	2	6303.3	0.997526	large	0.582214	medium	0.617688	medium	0.919956	large	0.578539	medium	1.04719	large	0.8217	large	0.290855	small	-0.322313	small	-0.270066	small	-0.312776	small	-0.425043	small	0.107596	small	-0.276513	small	-0.721201	medium	0.040818	small	-0.128677	small	0.391564	small	0.05587	small	-0.515582	medium	0.149941	small	-0.510742	medium	0.175985	small
737	1654.9	4	1005.39	1.04796	large	0.759535	medium	0.765752	medium	1.53438	very large	0.852659	large	1.18485	large	1.07141	large	0.471411	small	-0.158863	small	-0.171407	small	0.0514498	small	-0.184729	small	0.158155	small	-0.102814	small	-0.627713	medium	-0.232731	small	-0.255662	small	0.115372	small	-0.177016	small	-0.858624	large	0.0188835	small	-0.338936	small	0.0954346	small
738	1655.9	4	1134.96	0.919151	large	0.724488	medium	0.716854	medium	1.36184	very large	0.823881	large	1.0683	large	0.992088	large	0.400409	small	-0.107269	small	-0.138378	small	0.171232	small	-0.117804	small	0.121368	small	-0.0127558	small	-0.549511	medium	-0.327765	small	-0.307167	small	-0.0453204	small	-0.201751	small	-0.847462	large	-0.0177449	small	-0.243748	small	0.112381	small
739	1656.9	4	972.331	1.00926	large	0.747624	medium	0.742268	medium	1.46916	very large	0.846452	large	1.08665	large	1.0364	large	0.452162	small	-0.132833	small	-0.162693	small	0.184335	small	-0.161802	small	0.0900915	small	-0.0352412	small	-0.573084	medium	-0.359453	small	-0.36105	small	-0.0862471	small	-0.233825	small	-0.8621	large	0.000770157	small	-0.249877	small	0.133105	small
740	1657.9	4	820.618	1.05776	large	0.746372	medium	0.751278	medium	1.45449	very large	0.852414	large	1.13586	large	1.03879	large	0.456298	small	-0.152791	small	-0.192647	small	0.0894047	small	-0.128516	small	0.0784568	small	-0.0780926	small	-0.603854	medium	-0.291368	small	-0.217202	small	-0.00679528	small	-0.179362	small	-0.79612	medium	-0.0534592	small	-0.202743	small	0.0582667	small
741	1659.91	1	11238.2	0.758982	medium	0.625718	medium	0.611085	medium	1.07439	large	0.60252	medium	0.857631	large	0.720144	medium	0.353033	small	-0.112966	small	-0.138181	small	0.203073	small	-0.150337	small	0.108866	small	-0.0919439	small	-0.440753	small	-0.355114	small	-0.365771	small	-0.0823056	small	-0.330193	small	-0.734336	medium	0.0181079	small	-0.256288	small	0.0685686	small
742	1660.91	4	1376.3	0.820781	large	0.486068	small	0.457707	small	0.90056	large	0.423901	small	0.653024	medium	0.511685	medium	0.207507	small	-0.369194	small	-0.403693	small	0.057886	small	-0.421072	small	-0.145092	small	-0.373804	small	-0.68493	medium	-0.475446	small	-0.498145	small	-0.200629	small	-0.466119	small	-0.806842	large	0.0299148	small	-0.258593	small	0.0714298	small
743	1661.91	2	8175.54	0.775863	medium	0.476857	small	0.467411	small	0.902126	large	0.431231	small	0.695998	medium	0.551378	medium	0.229986	small	-0.245326	small	-0.264197	small	0.0660129	small	-0.301333	small	-0.0262689	small	-0.23433	small	-0.552839	medium	-0.332496	small	-0.369992	small	-0.0856191	small	-0.315759	small	-0.665335	medium	0.0432086	small	-0.256233	small	0.082951	small
744	1662.9	5	560.682	1.00845	large	0.54523	medium	0.544362	medium	1.12093	large	0.522885	medium	0.853659	large	0.714841	medium	0.247656	small	-0.336701	small	-0.34822	small	-0.0117315	small	-0.41662	small	-0.0808813	small	-0.273565	small	-0.720591	medium	-0.339663	small	-0.415041	small	-0.0691958	small	-0.269962	small	-0.763078	medium	0.0674623	small	-0.313232	small	0.150477	small
745	1663.9	4	802.039	1.1759	large	0.665712	medium	0.671883	medium	1.33153	very large	0.697164	medium	1.07868	large	0.898933	large	0.345042	small	-0.341723	small	-0.350932	small	-0.0466386	small	-0.411292	small	-0.028097	small	-0.275186	small	-0.795463	medium	-0.307995	small	-0.377693	small	0.0157534	small	-0.237484	small	-0.826201	large	0.0607412	small	-0.364184	small	0.14557	small
746	1664.89	4	1322.48	1.3157	very large	0.813376	large	0.821593	large	1.85428	very large	0.955794	large	1.20501	very large	1.19127	large	0.627711	medium	-0.170291	small	-0.175626	small	0.150405	small	-0.275926	small	0.0532226	small	-0.0010004	small	-0.663112	medium	-0.314198	small	-0.430366	small	-0.0797412	small	-0.138215	small	-0.887837	large	0.0806926	small	-0.303271	small	0.257439	small
747	1665.89	4	1386.95	1.23551	very large	0.822595	large	0.806344	large	1.99902	very large	1.08399	large	1.14544	large	1.20698	very large	0.653528	medium	-0.00746499	small	-0.0899567	small	0.347336	small	0.101641	small	0.152551	small	0.0667811	small	-0.5941	medium	-0.401668	small	-0.18618	small	-0.134404	small	-0.254347	small	-1.03686	large	-0.183856	small	-0.0461945	small	-0.0393184	small
748	1666.89	4	1407.53	0.972831	large	0.73117	medium	0.738877	medium	1.36713	very large	1.12329	large	1.09741	large	1.01626	large	0.495782	small	-0.140346	small	-0.346902	small	0.193744	small	0.144888	small	-0.0911817	small	-0.242145	small	-0.613125	medium	-0.635231	medium	-0.0535193	small	-0.31369	small	-0.487351	small	-0.897941	large	-0.530072	medium	0.249194	small	-0.403149	small
749	1667.87	4	1468.31	0.908255	large	0.637492	medium	0.587016	medium	1.2446	very large	1.03752	large	0.861319	large	0.945236	large	0.388247	small	-0.129839	small	-0.238925	small	0.163831	small	0.0365307	small	0.0632625	small	-0.2407	small	-0.620297	medium	-0.431428	small	-0.140525	small	-0.0862612	small	-0.453384	small	-0.871022	large	-0.286797	small	-0.0333924	small	-0.303947	small
750	1668.89	4	1129.88	0.916463	large	0.651645	medium	0.61101	medium	1.26662	very large	0.964114	large	0.89597	large	0.94588	large	0.392472	small	-0.10644	small	-0.172733	small	0.155174	small	-0.0195589	small	0.123199	small	-0.160655	small	-0.582272	medium	-0.337805	small	-0.185971	small	-0.0147801	small	-0.353786	small	-0.82414	large	-0.157753	small	-0.145191	small	-0.149133	small
751	1669.9	4	1430.94	0.901419	large	0.579553	medium	0.55045	medium	1.16494	large	0.75215	medium	0.840706	large	0.743703	medium	0.288433	small	-0.149602	small	-0.23553	small	0.217504	small	-0.0777631	small	0.0020064	small	-0.162053	small	-0.570674	medium	-0.460834	small	-0.277605	small	-0.200324	small	-0.373982	small	-0.77432	medium	-0.149584	small	-0.075565	small	-0.074439	small
752	1670.88	2	4833.75	0.638608	medium	0.433441	small	0.4141	small	0.681163	medium	0.490213	small	0.655142	medium	0.538739	medium	0.122291	small	-0.148996	small	-0.174785	small	0.0220695	small	-0.139985	small	0.0329101	small	-0.0597219	small	-0.536951	medium	-0.195259	small	-0.159985	small	0.0105783	small	-0.0777407	small	-0.583118	medium	-0.0375618	small	-0.168852	small	0.0724781	small
753	1671.89	3	3434.58	0.709659	medium	0.49031	small	0.479909	small	0.744024	medium	0.526744	medium	0.754294	medium	0.623625	medium	0.165323	small	-0.16022	small	-0.170787	small	-0.00836782	small	-0.182392	small	0.0582458	small	-0.0485445	small	-0.562957	medium	-0.162351	small	-0.17645	small	0.0653294	small	-0.039737	small	-0.594159	medium	0.00540703	small	-0.23689	small	0.124584	small
754	1672.89	3	1673.04	0.865947	large	0.608249	medium	0.595991	medium	0.996067	large	0.68177	medium	0.936631	large	0.784114	medium	0.258293	small	-0.167006	small	-0.186885	small	0.030777	small	-0.178482	small	0.0750529	small	-0.0625489	small	-0.607555	medium	-0.219182	small	-0.214256	small	0.0447434	small	-0.0929752	small	-0.69323	medium	-0.0113198	small	-0.25192	small	0.112481	small
755	1673.91	4	1019.11	1.00147	large	0.686962	medium	0.681705	medium	1.24533	very large	0.760687	medium	1.07994	large	0.915538	large	0.333374	small	-0.183453	small	-0.202236	small	0.0803589	small	-0.223326	small	0.110231	small	-0.108137	small	-0.651867	medium	-0.285149	small	-0.311794	small	0.0331838	small	-0.194852	small	-0.798672	medium	0.0178151	small	-0.325937	small	0.119639	small
756	1674.91	4	745.506	1.01356	large	0.744246	medium	0.726076	medium	1.3802	very large	0.900848	large	1.09809	large	0.991588	large	0.417487	small	-0.101069	small	-0.153154	small	0.159209	small	-0.0509453	small	0.131267	small	-0.0495304	small	-0.580994	medium	-0.313028	small	-0.202157	small	-0.0173718	small	-0.215816	small	-0.808083	large	-0.0986527	small	-0.175503	small	0.00438617	small
757	1675.91	2	6865.95	0.755195	medium	0.688726	medium	0.654966	medium	1.19933	large	0.824127	large	0.930561	large	0.884219	large	0.405399	small	0.0245167	small	-0.00762212	small	0.268055	small	0.033688	small	0.272998	small	0.0220292	small	-0.385505	small	-0.263431	small	-0.24682	small	0.0496248	small	-0.289743	small	-0.750827	medium	-0.0398125	small	-0.252434	small	-0.0144627	small
758	1676.91	4	870.07	1.12583	large	0.745977	medium	0.720577	medium	1.65973	very large	1.00327	large	1.06657	large	1.13406	large	0.541345	medium	-0.0992851	small	-0.129944	small	0.232104	small	-0.132823	small	0.218099	small	-0.141761	small	-0.635509	medium	-0.345163	small	-0.37563	small	0.0278401	small	-0.41066	small	-0.972603	large	-0.0110156	small	-0.326976	small	-0.000639354	small
759	1677.91	4	723.791	1.05885	large	0.73529	medium	0.716706	medium	1.4996	very large	0.935325	large	1.08014	large	1.04773	large	0.483334	small	-0.114911	small	-0.143312	small	0.170949	small	-0.137003	small	0.203066	small	-0.140189	small	-0.620399	medium	-0.310104	small	-0.319407	small	0.0540724	small	-0.343031	small	-0.898728	large	-0.0150613	small	-0.32328	small	0.00491505	small
760	1678.92	1	10415.8	0.580801	medium	0.651078	medium	0.618403	medium	1.04973	large	0.7099	medium	0.811679	large	0.827669	large	0.349833	small	0.0906085	small	0.0563613	small	0.347483	small	0.0940292	small	0.246246	small	0.172037	small	-0.261161	small	-0.293981	small	-0.269285	small	-0.0651099	small	-0.206892	small	-0.69457	medium	-0.0368725	small	-0.168299	small	0.077646	small
761	1680.91	5	595.067	1.03153	large	0.782859	medium	0.768206	medium	1.54983	very large	0.901159	large	1.0833	large	1.09312	large	0.479695	small	-0.0898911	small	-0.128298	small	0.271541	small	-0.112551	small	0.108356	small	0.0267934	small	-0.56219	medium	-0.401847	small	-0.389031	small	-0.142254	small	-0.251213	small	-0.9254	large	-0.0170096	small	-0.214958	small	0.141577	small
762	1681.91	5	603.104	0.964072	large	0.725645	medium	0.712238	medium	1.4046	very large	0.813473	large	1.02154	large	0.986979	large	0.43305	small	-0.100956	small	-0.126828	small	0.224758	small	-0.14432	small	0.131755	small	-0.0198146	small	-0.539174	medium	-0.350797	small	-0.380333	small	-0.0703839	small	-0.256431	small	-0.84959	large	0.0132917	small	-0.266424	small	0.129079	small
763	1682.93	4	740.682	1.0215	large	0.628361	medium	0.632075	medium	1.23685	very large	0.755565	medium	0.996889	large	0.883812	large	0.326162	small	-0.251505	small	-0.298734	small	0.116249	small	-0.277443	small	0.0347613	small	-0.262543	small	-0.720458	medium	-0.429119	small	-0.392043	small	-0.0767487	small	-0.390363	small	-0.87164	large	-0.0150774	small	-0.299107	small	0.0324093	small
764	1683.92	4	1101.58	0.98406	large	0.559699	medium	0.557868	medium	1.10607	large	0.645147	medium	0.86535	large	0.776488	medium	0.257397	small	-0.27206	small	-0.323111	small	0.111233	small	-0.308491	small	-0.0587702	small	-0.241987	small	-0.687097	medium	-0.436432	small	-0.399074	small	-0.15833	small	-0.341937	small	-0.769465	medium	-0.0111106	small	-0.235004	small	0.0786698	small
765	1684.91	4	1027.17	0.936132	large	0.542177	medium	0.535334	medium	1.04974	large	0.594978	medium	0.803353	large	0.756773	medium	0.249117	small	-0.245739	small	-0.279536	small	0.07314	small	-0.284708	small	-0.0631916	small	-0.170085	small	-0.624366	medium	-0.348658	small	-0.343525	small	-0.126673	small	-0.236405	small	-0.684898	medium	0.0031694	small	-0.206294	small	0.119637	small
766	1686.91	2	5772.09	0.817317	large	0.604453	medium	0.595337	medium	1.05173	large	0.654783	medium	0.860196	large	0.859468	large	0.267815	small	-0.105538	small	-0.125689	small	0.150275	small	-0.143383	small	0.106821	small	0.0140534	small	-0.532265	medium	-0.272568	small	-0.293333	small	-0.0313864	small	-0.141436	small	-0.712984	medium	0.0131406	small	-0.238541	small	0.16103	small
767	1687.93	2	6918.21	0.867209	large	0.664386	medium	0.660511	medium	1.09841	large	0.731634	medium	0.938212	large	0.971296	large	0.32302	small	-0.0915322	small	-0.102885	small	0.101194	small	-0.127316	small	0.134928	small	0.0565039	small	-0.543538	medium	-0.202387	small	-0.233529	small	0.0416026	small	-0.0480812	small	-0.70412	medium	0.0204819	small	-0.253429	small	0.188904	small
768	1690.88	2	4062.33	1.23802	very large	0.730232	medium	0.73393	medium	1.30012	very large	0.911347	large	1.1107	large	1.06447	large	0.43237	small	-0.291365	small	-0.345904	small	-0.0838381	small	-0.225306	small	-0.0533317	small	-0.241724	small	-0.772834	medium	-0.256326	small	-0.13804	small	0.0280027	small	-0.152533	small	-0.715114	medium	-0.103335	small	-0.164654	small	0.00356515	small
769	1691.9	3	2565.03	1.2498	very large	0.586551	medium	0.598597	medium	1.09393	large	0.696346	medium	0.989452	large	0.832376	large	0.266578	small	-0.447691	small	-0.510341	medium	-0.216326	small	-0.380226	small	-0.183774	small	-0.436783	small	-0.920327	large	-0.269323	small	-0.159356	small	0.0336847	small	-0.198928	small	-0.704225	medium	-0.0809888	small	-0.19587	small	-0.0107654	small
770	1692.91	3	1878.7	1.12055	large	0.579414	medium	0.589392	medium	1.07878	large	0.647926	medium	0.973949	large	0.841739	large	0.230381	small	-0.413209	small	-0.426292	small	-0.205227	small	-0.418469	small	-0.073359	small	-0.376051	small	-0.866417	large	-0.210259	small	-0.218086	small	0.121005	small	-0.166306	small	-0.741549	medium	0.0128099	small	-0.325415	small	0.0760487	small
771	1693.92	2	6833.5	0.815017	large	0.525303	medium	0.535063	medium	0.872866	large	0.54593	medium	0.88476	large	0.791703	medium	0.135401	small	-0.342706	small	-0.315475	small	-0.17291	small	-0.385253	small	0.0254814	small	-0.270735	small	-0.695487	medium	-0.127653	small	-0.249639	small	0.207192	small	-0.0988611	small	-0.721084	medium	0.0941313	small	-0.430223	small	0.173185	small
772	1694.91	3	1926.68	0.754712	medium	0.618086	medium	0.623369	medium	1.46312	very large	0.827832	large	1.06383	large	1.09539	large	0.403766	small	-0.332823	small	-0.266632	small	-0.18224	small	-0.400553	small	0.123035	small	-0.327854	small	-0.585153	medium	-0.0540853	small	-0.397545	small	0.356129	small	-0.255242	small	-0.935825	large	0.196017	small	-0.630798	medium	0.164855	small
773	1695.91	3	2250.29	0.695886	medium	0.66007	medium	0.652281	medium	1.45945	very large	0.926026	large	1.0477	large	1.14743	large	0.432111	small	-0.253571	small	-0.1986	small	-0.139705	small	-0.312719	small	0.14827	small	-0.225256	small	-0.515305	medium	-0.034572	small	-0.335398	small	0.344135	small	-0.140361	small	-0.922194	large	0.167972	small	-0.575618	medium	0.19211	small
774	1696.89	2	5630.96	0.664107	medium	0.370228	small	0.359121	small	1.13763	large	0.860877	large	0.529753	medium	1.07614	large	0.393883	small	0.00294041	small	0.0315824	small	-0.0341705	small	-0.146352	small	0.246596	small	-0.0319378	small	-0.421538	small	0.0490034	small	-0.176456	small	0.226199	small	0.0110454	small	-0.683509	medium	0.108702	small	-0.316182	small	0.18662	small
775	1697.89	3	2488.76	0.721311	medium	0.295751	small	0.289675	small	1.08822	large	0.722871	medium	0.430522	small	0.965755	large	0.331304	small	0.0175375	small	0.0423169	small	0.0146541	small	-0.158951	small	0.221004	small	0.0011521	small	-0.44639	small	0.0341155	small	-0.224254	small	0.182259	small	-0.0187985	small	-0.629255	medium	0.102487	small	-0.269888	small	0.203869	small
776	1698.9	3	2173.64	0.704689	medium	0.488025	small	0.471927	small	1.144	large	0.702548	medium	0.643185	medium	0.998845	large	0.308027	small	0.0207325	small	0.0392113	small	0.123688	small	-0.096035	small	0.253317	small	0.128596	small	-0.437999	small	-0.0445484	small	-0.263688	small	0.165487	small	0.00152372	small	-0.735619	medium	0.105362	small	-0.315458	small	0.256553	small
777	1699.92	2	5156.6	0.786974	medium	0.782317	medium	0.761358	medium	1.45959	very large	0.979336	large	1.04202	large	1.23979	very large	0.447389	small	0.107311	small	0.0832432	small	0.346491	small	0.0890176	small	0.318836	small	0.275643	small	-0.40263	small	-0.254263	small	-0.288724	small	0.0212619	small	-0.0936403	small	-0.907861	large	0.00134931	small	-0.25972	small	0.200765	small
778	1701.94	4	1198.83	0.832294	large	0.757075	medium	0.743255	medium	1.58425	very large	0.965905	large	1.04679	large	1.08163	large	0.438812	small	0.122117	small	0.0290671	small	0.6331	medium	0.204726	small	0.253159	small	0.221058	small	-0.451634	small	-0.643169	medium	-0.391347	small	-0.353141	small	-0.424798	small	-1.15071	large	-0.182404	small	-0.042052	small	-0.00106604	small
779	1702.92	3	1562.94	0.304923	small	0.15523	small	0.153244	small	0.506045	medium	0.0617065	small	0.22585	small	0.339766	small	-0.0733186	small	-0.126894	small	-0.132514	small	0.170276	small	-0.227677	small	-0.0777024	small	0.0347965	small	-0.350305	small	-0.308483	small	-0.401514	small	-0.25056	small	-0.133694	small	-0.523986	medium	0.0922693	small	-0.152547	small	0.260531	small
780	1703.91	3	1940.84	0.430145	small	0.303019	small	0.333422	small	0.70325	medium	0.146057	small	0.422	small	0.626045	medium	0.0753971	small	-0.0531615	small	-0.0221636	small	0.204707	small	-0.250718	small	0.0187633	small	0.209081	small	-0.29681	small	-0.204133	small	-0.457501	small	-0.168401	small	0.0193307	small	-0.487325	small	0.201038	small	-0.253476	small	0.43941	small
781	1706.85	1	13787.8	0.769092	medium	0.51305	medium	0.509794	medium	1.12623	large	0.613443	medium	0.755383	medium	0.751979	medium	0.239612	small	-0.117463	small	-0.165921	small	0.286757	small	-0.166612	small	-0.00908921	small	0.00401645	small	-0.536842	medium	-0.48385	small	-0.456003	small	-0.291053	small	-0.275649	small	-0.84027	large	-0.00108678	small	-0.155892	small	0.166938	small
782	1706.98	3	2012.2	0.741426	medium	0.468452	small	0.464581	small	1.0546	large	0.571355	medium	0.71063	medium	0.663707	medium	0.212705	small	-0.145271	small	-0.203333	small	0.264602	small	-0.18294	small	-0.0398731	small	-0.0599469	small	-0.538653	medium	-0.506754	medium	-0.446571	small	-0.301431	small	-0.315571	small	-0.807851	large	-0.0182251	small	-0.143201	small	0.11864	small
783	1707.85	2	7931.93	0.755895	medium	0.494906	small	0.486496	small	1.10325	large	0.637392	medium	0.765536	medium	0.660483	medium	0.258326	small	-0.192262	small	-0.254614	small	0.20392	small	-0.1989	small	-0.0876121	small	-0.113768	small	-0.549382	medium	-0.51527	medium	-0.428699	small	-0.30918	small	-0.321657	small	-0.828988	large	-0.0477399	small	-0.121531	small	0.0808702	small
784	1708.89	3	3678.84	0.897101	large	0.623639	medium	0.619951	medium	1.27563	very large	0.790263	medium	0.962975	large	0.861382	large	0.341253	small	-0.212841	small	-0.265687	small	0.158567	small	-0.21395	small	-0.0281984	small	-0.13866	small	-0.619461	medium	-0.471393	small	-0.405228	small	-0.1989	small	-0.318834	small	-0.890064	large	-0.043232	small	-0.198615	small	0.080414	small
785	1709.91	3	1691.7	0.991133	large	0.722839	medium	0.711802	medium	1.38461	very large	0.916618	large	1.04558	large	1.07112	large	0.413399	small	-0.147666	small	-0.181613	small	0.146938	small	-0.160357	small	0.084531	small	-0.0583149	small	-0.614266	medium	-0.346182	small	-0.331873	small	-0.056562	small	-0.226554	small	-0.860426	large	-0.0246651	small	-0.244651	small	0.113309	small
786	1710.92	4	1035.21	0.957002	large	0.775433	medium	0.762354	medium	1.42212	very large	0.974308	large	1.05538	large	1.20247	very large	0.482646	small	-0.0418499	small	-0.0521154	small	0.169765	small	-0.0896793	small	0.190416	small	0.10789	small	-0.517473	medium	-0.221816	small	-0.290487	small	0.0390462	small	-0.0734146	small	-0.7973	medium	0.031197	small	-0.28371	small	0.215982	small
787	1711.93	4	836.861	0.841447	large	0.703402	medium	0.695054	medium	1.3024	very large	0.841287	large	0.975724	large	1.12248	large	0.383804	small	-0.0519435	small	-0.0440153	small	0.112446	small	-0.133992	small	0.195593	small	0.112778	small	-0.504201	medium	-0.158537	small	-0.295893	small	0.0987784	small	-0.00364111	small	-0.777563	medium	0.0823471	small	-0.33537	small	0.281163	small
788	1712.93	4	666.233	0.812676	large	0.703595	medium	0.690028	medium	1.2774	very large	0.829967	large	0.959709	large	1.07773	large	0.378295	small	-0.035873	small	-0.0427579	small	0.165316	small	-0.0881754	small	0.184431	small	0.113479	small	-0.47313	small	-0.213908	small	-0.295257	small	0.0378563	small	-0.0647189	small	-0.780099	medium	0.0419858	small	-0.282162	small	0.226405	small
789	1713.94	4	700.818	0.454744	small	0.345254	small	0.34415	small	0.590706	medium	0.31956	small	0.53339	medium	0.561735	medium	0.0102981	small	-0.0814441	small	-0.0786006	small	0.0757995	small	-0.144269	small	0.101046	small	0.07209	small	-0.433263	small	-0.155453	small	-0.2358	small	0.0317979	small	-0.00568821	small	-0.565113	medium	0.0603209	small	-0.239244	small	0.228548	small
790	1714.93	4	854.611	0.607722	medium	0.459226	small	0.450384	small	0.835651	large	0.517724	medium	0.69536	medium	0.726125	medium	0.10421	small	-0.0583987	small	-0.059842	small	0.100301	small	-0.111739	small	0.180559	small	0.0474596	small	-0.48804	small	-0.15424	small	-0.227819	small	0.092792	small	-0.0611246	small	-0.671545	medium	0.0416804	small	-0.280057	small	0.17137	small
791	1716.93	2	6265.91	0.443588	small	0.524143	medium	0.485481	small	0.746906	medium	0.679623	medium	0.657006	medium	0.790614	medium	0.152154	small	0.104588	small	0.0679729	small	0.194163	small	0.175828	small	0.231356	small	0.253748	small	-0.305406	small	-0.123912	small	-0.0246301	small	0.061927	small	0.0542054	small	-0.587543	medium	-0.102771	small	-0.0870916	small	0.0787527	small
792	1717.94	4	678.084	0.854906	large	0.668233	medium	0.678945	medium	1.18456	large	0.781729	medium	0.982074	large	0.999122	large	0.376657	small	-0.0399072	small	-0.0794133	small	0.0798938	small	0.0212567	small	0.158986	small	0.0583773	small	-0.500146	medium	-0.162275	small	-0.04927	small	0.0869284	small	-0.0240492	small	-0.683883	medium	-0.0984101	small	-0.12749	small	0.0310354	small
793	1718.93	4	1003.95	0.651568	medium	0.364803	small	0.357799	small	0.431719	small	0.370538	small	0.586691	medium	0.4703	small	0.0326893	small	-0.347201	small	-0.338819	small	-0.273147	small	-0.319833	small	-0.0739082	small	-0.25945	small	-0.653765	medium	-0.041451	small	-0.0428519	small	0.204667	small	0.0419811	small	-0.474777	small	-0.000530476	small	-0.246907	small	0.0824508	small
794	1719.93	4	904.556	0.581045	medium	0.295576	small	0.287446	small	0.369294	small	0.270055	small	0.492871	small	0.383363	small	-0.0281171	small	-0.367406	small	-0.353543	small	-0.253119	small	-0.360067	small	-0.0974707	small	-0.265733	small	-0.659678	medium	-0.0799315	small	-0.112495	small	0.160107	small	0.00704958	small	-0.509834	medium	0.0238789	small	-0.26293	small	0.118942	small
795	1720.93	4	914.828	0.384387	small	0.0510284	small	0.0649447	small	0.125653	small	-0.0276005	small	0.229087	small	0.14134	small	-0.185699	small	-0.414193	small	-0.380732	small	-0.286861	small	-0.477227	small	-0.165147	small	-0.289031	small	-0.651577	medium	-0.0783451	small	-0.203011	small	0.118809	small	0.0123777	small	-0.41466	small	0.103843	small	-0.301272	small	0.209173	small
796	1721.93	4	899.698	0.501795	medium	0.233445	small	0.240055	small	0.381352	small	0.1523	small	0.420538	small	0.367428	small	-0.0603317	small	-0.277269	small	-0.258932	small	-0.1294	small	-0.374226	small	-0.053393	small	-0.144622	small	-0.601834	medium	-0.132598	small	-0.252505	small	0.065089	small	-0.0148371	small	-0.497772	small	0.0980355	small	-0.29335	small	0.231572	small
797	1722.93	4	804.552	0.734872	medium	0.503909	medium	0.500008	medium	0.823265	large	0.52185	medium	0.742573	medium	0.725141	medium	0.180589	small	-0.144609	small	-0.147079	small	0.0344982	small	-0.20376	small	0.0768666	small	-0.0219285	small	-0.533319	medium	-0.179145	small	-0.241235	small	0.0434105	small	-0.0572896	small	-0.590626	medium	0.0447304	small	-0.261642	small	0.184835	small
798	1723.95	4	732.166	0.869924	large	0.637468	medium	0.636818	medium	1.01361	large	0.710717	medium	0.927651	large	0.911568	large	0.328792	small	-0.129182	small	-0.126308	small	0.0163338	small	-0.187016	small	0.130019	small	-0.017747	small	-0.538065	medium	-0.143128	small	-0.214039	small	0.111625	small	-0.0361088	small	-0.605186	medium	0.0501759	small	-0.305427	small	0.179106	small
799	1724.94	4	687.244	0.888307	large	0.692336	medium	0.675758	medium	1.15234	large	0.833476	large	0.952899	large	0.97756	large	0.38533	small	-0.0875637	small	-0.109293	small	0.097081	small	-0.0891699	small	0.13181	small	0.0121777	small	-0.515456	medium	-0.207993	small	-0.19673	small	0.0423551	small	-0.0929836	small	-0.680285	medium	-0.0241539	small	-0.218613	small	0.107636	small
800	1725.92	4	777.111	0.843189	large	0.675251	medium	0.66318	medium	1.14796	large	0.799237	medium	0.92206	large	1.02034	large	0.359409	small	-0.0716682	small	-0.0808773	small	0.114264	small	-0.1107	small	0.128463	small	0.0738847	small	-0.469005	small	-0.197019	small	-0.247053	small	0.0235006	small	-0.0483653	small	-0.641688	medium	0.0233316	small	-0.239542	small	0.200317	small
801	1726.92	4	1015.27	0.864255	large	0.737616	medium	0.709734	medium	1.29482	very large	0.925602	large	0.949363	large	1.08165	large	0.41687	small	-0.00976842	small	-0.0518204	small	0.258177	small	0.0126004	small	0.110361	small	0.149908	small	-0.42679	small	-0.314	small	-0.261235	small	-0.135064	small	-0.118457	small	-0.723481	medium	-0.0652574	small	-0.102846	small	0.143655	small
802	1727.92	4	887.448	0.825729	large	0.749089	medium	0.715779	medium	1.26782	very large	0.945923	large	0.924824	large	1.07921	large	0.434235	small	0.0181819	small	-0.0307659	small	0.262113	small	0.0690322	small	0.112747	small	0.179889	small	-0.397945	small	-0.299926	small	-0.206085	small	-0.137426	small	-0.0914468	small	-0.718199	medium	-0.100256	small	-0.0504402	small	0.11568	small
803	1728.91	4	821.602	0.790118	medium	0.711753	medium	0.682169	medium	1.19911	large	0.904634	large	0.896223	large	0.984999	large	0.421558	small	0.0204593	small	-0.0395088	small	0.272228	small	0.0950886	small	0.10483	small	0.140866	small	-0.373214	small	-0.324913	small	-0.181372	small	-0.162205	small	-0.14196	small	-0.685687	medium	-0.136687	small	-0.0124554	small	0.0443643	small
804	1730.94	2	6566.02	0.444485	small	0.667876	medium	0.597751	medium	0.825733	large	0.92913	large	0.693882	medium	0.851164	large	0.35703	small	0.218703	small	0.140049	small	0.290339	small	0.405259	small	0.213924	small	0.323786	small	-0.11437	small	-0.171334	small	0.106467	small	-0.0769904	small	0.0165308	small	-0.452346	small	-0.281195	small	0.184158	small	-0.0943886	small
805	1731.96	3	2416.21	0.978937	large	0.863845	large	0.855059	large	1.28489	very large	1.16526	large	1.14554	large	1.29909	very large	0.63307	medium	0.0036885	small	-0.0126082	small	-0.0249243	small	0.0611979	small	0.161608	small	0.199597	small	-0.439289	small	0.0124598	small	0.0945812	small	0.18935	small	0.238771	small	-0.494449	small	-0.0748525	small	-0.113227	small	0.15071	small
806	1733.99	4	1063.52	-0.211937	small	-0.420126	small	-0.336808	small	-0.292506	small	-0.354969	small	-0.264816	small	-0.221137	small	-0.299542	small	-0.225829	small	-0.137155	small	-0.362452	small	-0.449624	small	-0.157897	small	-0.0276158	small	-0.217766	small	0.191022	small	-0.0614445	small	0.258088	small	0.330735	small	0.0793348	small	0.238988	small	-0.329446	small	0.414601	small
807	1734.99	3	1526.01	-0.181622	small	-0.411155	small	-0.331264	small	-0.277963	small	-0.35141	small	-0.237524	small	-0.233017	small	-0.303794	small	-0.284578	small	-0.197363	small	-0.366815	small	-0.490741	small	-0.149298	small	-0.132116	small	-0.287643	small	0.147441	small	-0.119116	small	0.249717	small	0.245998	small	0.0263736	small	0.228691	small	-0.363583	small	0.357674	small
808	1735.97	4	1296.1	0.107112	small	-0.0255595	small	-0.00610416	small	-0.0126762	small	-0.0665215	small	0.118537	small	0.0555066	small	-0.184262	small	-0.211466	small	-0.17743	small	-0.204038	small	-0.29636	small	0.0229092	small	-0.0867567	small	-0.489687	small	0.0138827	small	-0.101229	small	0.20158	small	0.127266	small	-0.325208	small	0.0976331	small	-0.293733	small	0.219689	small
809	1736.95	4	1167.89	0.555474	medium	0.438706	small	0.417888	small	0.560933	medium	0.457045	small	0.641087	medium	0.556246	medium	0.0757205	small	-0.140916	small	-0.144118	small	-0.0557781	small	-0.142466	small	0.117399	small	-0.0611259	small	-0.544536	medium	-0.0926798	small	-0.0987235	small	0.169016	small	-0.00369049	small	-0.627696	medium	-0.00567433	small	-0.257682	small	0.0941105	small
810	1738.01	4	1417.38	0.74139	medium	0.655155	medium	0.632708	medium	1.0449	large	0.805668	large	0.930747	large	0.911439	large	0.322485	small	-0.150183	small	-0.151525	small	-0.0454329	small	-0.143047	small	0.10853	small	-0.0683807	small	-0.504498	medium	-0.112761	small	-0.12508	small	0.169749	small	-0.0256679	small	-0.679717	medium	-0.0068506	small	-0.282211	small	0.0968643	small
811	1738.98	3	2290.81	0.778409	medium	0.575165	medium	0.554883	medium	0.768934	medium	0.639147	medium	0.909691	large	0.695013	medium	0.152602	small	-0.259329	small	-0.255334	small	-0.12331	small	-0.26611	small	0.103668	small	-0.212927	small	-0.690379	medium	-0.126379	small	-0.155392	small	0.232716	small	-0.0922185	small	-0.727365	medium	0.00831386	small	-0.39118	small	0.0637481	small
812	1739.97	3	3476.99	0.656263	medium	0.447514	small	0.44979	small	0.581194	medium	0.392697	small	0.720961	medium	0.567013	medium	0.0717084	small	-0.25165	small	-0.230614	small	-0.0929131	small	-0.346946	small	0.080793	small	-0.154408	small	-0.666954	medium	-0.131054	small	-0.263592	small	0.167284	small	-0.0544224	small	-0.637572	medium	0.104869	small	-0.424873	small	0.216923	small
813	1740.96	2	7741.94	0.676797	medium	0.524115	medium	0.514328	medium	0.759382	medium	0.572368	medium	0.778803	medium	0.71506	medium	0.173379	small	-0.125658	small	-0.124441	small	0.0273747	small	-0.182268	small	0.147426	small	-0.0442788	small	-0.531118	medium	-0.153884	small	-0.226706	small	0.116456	small	-0.0780857	small	-0.610229	medium	0.0449544	small	-0.326876	small	0.156733	small
814	1741.94	4	1246.53	0.897538	large	0.533875	medium	0.532566	medium	0.976762	large	0.602381	medium	0.803041	large	0.819281	large	0.261375	small	-0.169764	small	-0.146051	small	-0.0206587	small	-0.314369	small	0.148698	small	-0.133664	small	-0.601428	medium	-0.125126	small	-0.304496	small	0.148991	small	-0.115356	small	-0.612874	medium	0.111233	small	-0.383543	small	0.194149	small
815	1742.89	3	2063.62	0.76285	medium	0.51547	medium	0.514493	medium	0.939647	large	0.65665	medium	0.773908	medium	0.726653	medium	0.237187	small	-0.122179	small	-0.180514	small	0.182528	small	-0.108088	small	0.0281752	small	-0.0663788	small	-0.53148	medium	-0.382803	small	-0.283909	small	-0.151987	small	-0.24765	small	-0.68705	medium	-0.070028	small	-0.134121	small	0.0440774	small
816	1743.89	1	14513.4	0.8285	large	0.638611	medium	0.667563	medium	1.38723	very large	0.723716	medium	0.939489	large	1.00826	large	0.470326	small	0.0326127	small	0.00600474	small	0.423555	small	-0.0408421	small	0.0904988	small	0.242295	small	-0.363942	small	-0.433637	small	-0.444912	small	-0.335995	small	-0.163931	small	-0.806273	large	0.0457758	small	-0.127668	small	0.272733	small
817	1744.9	1	12264.7	0.823154	large	0.650026	medium	0.678889	medium	1.43834	very large	0.738568	medium	0.954265	large	1.02535	large	0.496306	small	0.0522074	small	0.0245181	small	0.438452	small	-0.00957507	small	0.098518	small	0.26659	small	-0.341555	small	-0.426538	small	-0.42333	small	-0.345001	small	-0.148788	small	-0.811919	large	0.0333265	small	-0.102942	small	0.264833	small
818	1745.91	2	5939.78	0.897132	large	0.710712	medium	0.73117	medium	1.57094	very large	0.884635	large	1.03045	large	1.1101	large	0.533341	medium	0.0877525	small	0.0157434	small	0.427654	small	0.171531	small	0.109344	small	0.264957	small	-0.374	small	-0.416988	small	-0.190689	small	-0.31764	small	-0.139562	small	-0.847887	large	-0.166734	small	0.078377	small	0.0664985	small
819	1746.93	3	2654.06	0.996465	large	0.78391	medium	0.811989	large	1.92354	very large	0.95964	large	1.15253	large	1.24371	very large	0.592111	medium	0.0706642	small	-0.0252546	small	0.465865	small	0.183497	small	0.118062	small	0.215684	small	-0.453773	small	-0.510604	medium	-0.193095	small	-0.344037	small	-0.2393	small	-1.04622	large	-0.225732	small	0.084835	small	-0.00126912	small
820	1747.93	2	7618	0.870281	large	0.830073	large	0.821745	large	1.82952	very large	1.10339	large	1.13151	large	1.24457	very large	0.608557	medium	0.122175	small	0.023568	small	0.435387	small	0.269027	small	0.173067	small	0.237816	small	-0.376577	small	-0.452428	small	-0.125079	small	-0.264865	small	-0.208916	small	-0.999414	large	-0.277227	small	0.111686	small	-0.0569834	small
821	1748.93	3	1826.66	0.910962	large	0.86182	large	0.822589	large	1.7406	very large	1.18724	large	1.1608	large	1.25037	very large	0.560882	medium	0.00631668	small	-0.0722814	small	0.244341	small	0.12623	small	0.164228	small	0.0814971	small	-0.498176	small	-0.361408	small	-0.1324	small	-0.0735981	small	-0.203834	small	-1.01664	large	-0.217254	small	-0.0479525	small	-0.0551846	small
822	1749.95	3	1536.14	0.767553	medium	0.834456	large	0.766823	medium	1.46732	very large	1.18327	large	1.04872	large	1.09699	large	0.499516	small	0.0780447	small	-0.00843538	small	0.27448	small	0.231371	small	0.203339	small	0.12057	small	-0.375466	small	-0.324481	small	-0.0565003	small	-0.0607347	small	-0.196149	small	-0.868685	large	-0.265275	small	0.0113774	small	-0.130736	small
823	1751.52	2	8013.95	0.774264	medium	0.847989	large	0.753576	medium	1.47996	very large	1.26353	very large	0.958446	large	1.07673	large	0.505906	medium	0.0982403	small	-0.0216427	small	0.402101	small	0.308221	small	0.149951	small	0.121509	small	-0.349474	small	-0.482524	small	-0.129432	small	-0.244898	small	-0.347704	small	-0.914352	large	-0.357259	small	0.14248	small	-0.216806	small
824	1751.93	4	1092.27	1.00778	large	0.730791	medium	0.700472	medium	1.45606	very large	1.03538	large	1.00811	large	1.01675	large	0.459223	small	-0.137642	small	-0.231446	small	0.236606	small	-0.0403352	small	0.00771202	small	-0.112937	small	-0.609147	medium	-0.508569	medium	-0.292646	small	-0.225019	small	-0.375407	small	-0.929207	large	-0.194763	small	-0.0479775	small	-0.0757569	small
825	1752.94	4	1437.92	1.08371	large	0.756212	medium	0.763195	medium	1.4361	very large	1.03494	large	1.06957	large	1.14557	large	0.558603	medium	-0.171137	small	-0.237986	small	0.205684	small	-0.153888	small	-0.0119542	small	-0.0987257	small	-0.619331	medium	-0.480659	small	-0.374384	small	-0.214567	small	-0.322608	small	-0.866391	large	-0.0836193	small	-0.14024	small	0.0620812	small
826	1753.95	4	1079.79	1.09814	large	0.783521	medium	0.790351	medium	1.56113	very large	1.01476	large	1.1046	large	1.19777	large	0.590617	medium	-0.192959	small	-0.234327	small	0.169387	small	-0.217835	small	-0.00604713	small	-0.0953152	small	-0.612554	medium	-0.438839	small	-0.420006	small	-0.175195	small	-0.291935	small	-0.880229	large	-0.0138899	small	-0.212049	small	0.138791	small
827	1756.96	1	10548.8	0.797516	medium	0.524555	medium	0.491236	small	1.01063	large	0.679603	medium	0.70049	medium	0.725809	medium	0.232718	small	-0.194196	small	-0.242508	small	0.106771	small	-0.172387	small	-0.0422002	small	-0.140767	small	-0.558181	medium	-0.362096	small	-0.29365	small	-0.140249	small	-0.261226	small	-0.70898	medium	-0.0761374	small	-0.117801	small	0.0347917	small
828	1758	1	28563.3	-0.648664	medium	-1.14819	large	-0.934266	large	-0.850036	large	-1.00495	large	-0.856097	large	-0.80651	large	-0.645471	medium	-0.396027	small	-0.236049	small	-0.703772	medium	-0.868346	large	-0.468644	small	-0.33113	small	-0.0412307	small	0.346562	small	-0.0845563	small	0.459596	small	0.309136	small	0.45503	small	0.388093	small	-0.580471	medium	0.388728	small
829	1759	1	22900.3	-0.651687	medium	-1.14991	large	-0.933718	large	-0.85575	large	-1.01236	large	-0.854842	large	-0.807362	large	-0.646405	medium	-0.392253	small	-0.229703	small	-0.707947	medium	-0.875371	large	-0.455429	small	-0.325348	small	-0.0385102	small	0.356093	small	-0.111695	small	0.491115	small	0.320236	small	0.459492	small	0.399896	small	-0.622508	medium	0.404135	small
830	1759.7	5	342.726	-0.0808115	small	-0.177658	small	-0.166781	small	-0.324438	small	-0.109612	small	-0.179111	small	-0.190146	small	-0.0932533	small	-0.0896909	small	-0.082173	small	-0.294135	small	-0.0301294	small	-0.110374	small	-0.123025	small	-0.0101786	small	0.236769	small	0.283206	small	0.209285	small	0.189973	small	0.315958	small	-0.051682	small	0.0836443	small	-0.0971273	small
831	1760	2	6632.77	-0.579274	medium	-1.05951	large	-0.852488	large	-0.810973	large	-0.967931	large	-0.7709	medium	-0.742022	medium	-0.609406	medium	-0.419336	small	-0.250939	small	-0.764971	medium	-0.961385	large	-0.427879	small	-0.339747	small	-0.100052	small	0.353081	small	-0.139614	small	0.512866	medium	0.324644	small	0.420425	small	0.413469	small	-0.670585	medium	0.428938	small
832	1760.14	5	561.439	-0.442316	small	-0.907849	large	-0.725643	medium	-0.73422	medium	-0.830003	large	-0.662645	medium	-0.646214	medium	-0.498374	small	-0.417659	small	-0.263215	small	-0.661851	medium	-0.72452	medium	-0.382444	small	-0.34092	small	-0.0961911	small	0.396818	small	0.180694	small	0.495089	small	0.352806	small	0.49515	small	0.369978	small	-0.465215	small	0.341705	small
833	1760.72	5	171.813	-0.0998041	small	-0.0824693	small	-0.102001	small	-0.316783	small	0.059011	small	-0.109721	small	-0.145784	small	-0.042014	small	0.0246041	small	0.00464777	small	-0.234921	small	0.166868	small	-0.00822261	small	-0.0465463	small	0.0644915	small	0.24906	small	0.405198	small	0.238414	small	0.197317	small	0.316691	small	-0.170742	small	0.180013	small	-0.217971	small
834	1761	3	1537.61	-0.347713	small	-0.784756	medium	-0.624143	medium	-0.661598	medium	-0.794197	medium	-0.515295	medium	-0.549529	medium	-0.527248	medium	-0.46239	small	-0.313953	small	-0.75489	medium	-0.902108	large	-0.309243	small	-0.359547	small	-0.308789	small	0.2973	small	-0.0836372	small	0.436983	small	0.296801	small	0.267385	small	0.361886	small	-0.546303	medium	0.38998	small
835	1761.15	2	5306.34	-0.444238	small	-0.845582	large	-0.701758	medium	-0.738249	medium	-0.724159	medium	-0.608257	medium	-0.624958	medium	-0.529761	medium	-0.355387	small	-0.249783	small	-0.723715	medium	-0.527872	medium	-0.299833	small	-0.323085	small	-0.158977	small	0.391335	small	0.42715	small	0.524009	medium	0.367089	small	0.423982	small	0.18019	small	-0.226256	small	0.128712	small
836	1761.96	4	885.577	0.252708	small	0.0879664	small	0.0335919	small	0.0464146	small	0.239073	small	0.225552	small	0.101509	small	-0.229314	small	-0.14523	small	-0.221564	small	-0.22409	small	0.0313134	small	-0.00796922	small	-0.158658	small	-0.531622	medium	-0.0128949	small	0.189121	small	0.184736	small	0.0594392	small	-0.313922	small	-0.228328	small	0.0356532	small	-0.155171	small
837	1762.95	4	1295.37	0.98144	large	0.605363	medium	0.667413	medium	1.35722	very large	0.969237	large	1.0179	large	1.00834	large	0.373543	small	0.102965	small	-0.127589	small	0.0836252	small	0.497811	small	0.168238	small	-0.0303813	small	-0.621388	medium	-0.209069	small	0.396162	small	0.092237	small	-0.12032	small	-0.8205	large	-0.703651	medium	0.383529	small	-0.514541	medium
838	1763.92	2	8223.44	0.980515	large	0.622943	medium	0.599179	medium	1.23922	very large	1.12616	large	0.910983	large	1.36134	very large	0.769177	medium	0.108302	small	0.0205902	small	0.481833	small	0.263125	small	0.364801	small	-0.0494718	small	-0.579694	medium	-0.463696	small	-0.258665	small	-0.054432	small	-0.559466	medium	-0.9195	large	-0.206096	small	-0.173999	small	-0.335999	small
839	1765.92	3	1972.95	1.10123	large	0.679146	medium	0.684216	medium	1.33098	very large	1.08708	large	1.00711	large	1.26172	very large	0.600774	medium	0.0260294	small	-0.0382754	small	0.442866	small	0.0433295	small	0.303316	small	-0.0413967	small	-0.617305	medium	-0.488563	small	-0.40364	small	-0.0953252	small	-0.498769	small	-0.925803	large	-0.0752048	small	-0.269435	small	-0.086669	small
840	1766.93	3	2885.39	0.999633	large	0.706092	medium	0.711654	medium	1.39805	very large	0.951104	large	1.06673	large	1.00199	large	0.485956	small	-0.0522318	small	-0.128569	small	0.359195	small	-0.0228089	small	0.102807	small	-0.00403798	small	-0.529011	medium	-0.521349	medium	-0.377758	small	-0.252075	small	-0.362369	small	-0.872775	large	-0.104817	small	-0.123989	small	0.018838	small
841	1767.91	1	9715.72	0.968619	large	0.78627	medium	0.773586	medium	1.46194	very large	1.16427	large	1.12021	large	1.10084	large	0.571788	medium	0.0367455	small	-0.0555205	small	0.425603	small	0.137082	small	0.194132	small	0.0515431	small	-0.464412	small	-0.529686	medium	-0.316004	small	-0.227394	small	-0.396011	small	-0.902289	large	-0.195164	small	-0.0696602	small	-0.0896712	small
842	1769	3	1735.44	1.0537	large	0.821427	large	0.802371	large	1.79486	very large	1.06492	large	1.19047	large	1.11609	large	0.549842	medium	-0.039883	small	-0.136045	small	0.444517	small	0.0294667	small	0.129738	small	-0.0234189	small	-0.54752	medium	-0.626526	medium	-0.410577	small	-0.306617	small	-0.496451	small	-1.09474	large	-0.166342	small	-0.0995808	small	-0.0539717	small
843	1771.98	2	6706.19	0.819885	large	0.470256	small	0.433782	small	0.925394	large	0.576531	medium	0.746713	medium	0.559571	medium	0.102816	small	-0.25502	small	-0.304049	small	0.01257	small	-0.212778	small	0.0284948	small	-0.31286	small	-0.714736	medium	-0.31959	small	-0.227802	small	0.0165111	small	-0.349205	small	-0.808534	large	-0.0883253	small	-0.217991	small	-0.0805814	small
844	1772.98	1	14754.7	0.458672	small	0.0213356	small	0.0728085	small	0.0864336	small	-0.155903	small	0.190408	small	0.153444	small	-0.12043	small	-0.494801	small	-0.42342	small	-0.395308	small	-0.66132	medium	-0.274358	small	-0.338352	small	-0.609767	medium	-0.015809	small	-0.289379	small	0.115653	small	0.075286	small	-0.236231	small	0.240253	small	-0.374501	small	0.350335	small
845	1774.97	3	1758.6	0.88321	large	0.309937	small	0.355491	small	0.528689	medium	0.134213	small	0.59734	medium	0.486828	small	0.067024	small	-0.543689	medium	-0.48167	small	-0.39032	small	-0.709531	medium	-0.248318	small	-0.39854	small	-0.771183	medium	-0.0864208	small	-0.348743	small	0.130265	small	-0.00304693	small	-0.41923	small	0.227506	small	-0.441861	small	0.330146	small
846	1775.96	1	12830.9	1.06334	large	0.766079	medium	0.76038	medium	1.39677	very large	0.914187	large	1.09092	large	1.10938	large	0.469845	small	-0.122159	small	-0.146065	small	0.068807	small	-0.119011	small	0.0756479	small	0.0319641	small	-0.589747	medium	-0.215785	small	-0.191682	small	0.0116924	small	-0.0361711	small	-0.739724	medium	-0.027679	small	-0.189248	small	0.15126	small
847	1777.96	4	838.764	0.969807	large	0.78735	medium	0.76575	medium	1.50995	very large	0.96744	large	1.09112	large	1.11738	large	0.461315	small	-0.0365605	small	-0.0847255	small	0.258455	small	-0.0067402	small	0.135021	small	0.0980809	small	-0.524813	medium	-0.348856	small	-0.268555	small	-0.110035	small	-0.164047	small	-0.887352	large	-0.0782784	small	-0.142718	small	0.105772	small
848	1778.98	4	980.232	1.03757	large	0.884981	large	0.860055	large	1.70805	very large	1.12803	large	1.22467	very large	1.25198	very large	0.584817	medium	0.0313921	small	-0.0185724	small	0.341962	small	0.0651272	small	0.238701	small	0.151563	small	-0.50077	medium	-0.356652	small	-0.281199	small	-0.0739291	small	-0.194702	small	-0.960893	large	-0.0825353	small	-0.181133	small	0.0872063	small
849	1779.98	4	966.508	0.815673	large	0.668004	medium	0.655122	medium	1.11622	large	0.735522	medium	0.982681	large	0.904074	large	0.307784	small	-0.0744016	small	-0.0814351	small	0.131355	small	-0.125508	small	0.21675	small	0.0167765	small	-0.544626	medium	-0.213713	small	-0.281336	small	0.098753	small	-0.126607	small	-0.796721	medium	0.0379791	small	-0.342806	small	0.152629	small
850	1780.96	2	8072.88	0.834468	large	0.79967	medium	0.767266	medium	1.32682	very large	1.02163	large	1.10056	large	1.07343	large	0.471419	small	0.046443	small	0.00379637	small	0.248154	small	0.0936947	small	0.285074	small	0.104423	small	-0.4306	small	-0.252981	small	-0.173421	small	0.0578656	small	-0.169836	small	-0.806619	large	-0.0902083	small	-0.214815	small	0.00951668	small
851	1785.97	2	8471.19	0.929053	large	0.843755	large	0.804463	large	1.50849	very large	1.13727	large	1.12696	large	1.15414	large	0.553238	medium	0.0384263	small	-0.0262247	small	0.277542	small	0.133964	small	0.2329	small	0.08407	small	-0.441414	small	-0.314657	small	-0.15307	small	-0.0214979	small	-0.221691	small	-0.838104	large	-0.163033	small	-0.115926	small	-0.057564	small
852	1786.98	2	7576.63	0.890846	large	0.704257	medium	0.680097	medium	1.13971	large	0.906947	large	1.01605	large	0.94527	large	0.406635	small	-0.0957848	small	-0.118265	small	0.0274473	small	-0.067416	small	0.178827	small	-0.0766456	small	-0.510293	medium	-0.149407	small	-0.10416	small	0.152401	small	-0.117675	small	-0.622988	medium	-0.0555837	small	-0.252606	small	-0.0083014	small
853	1788.98	2	6985.87	0.767355	medium	0.671431	medium	0.677847	medium	1.41824	very large	0.756643	medium	0.942647	large	1.08055	large	0.37492	small	0.1391	small	0.118913	small	0.526153	medium	0.0929577	small	0.29005	small	0.378935	small	-0.340214	small	-0.343133	small	-0.372656	small	-0.166209	small	-0.108126	small	-0.855822	large	0.0305241	small	-0.185632	small	0.261562	small
854	1789.97	4	949.717	0.710678	medium	0.429755	small	0.416093	small	0.670338	medium	0.417911	small	0.66116	medium	0.554179	medium	0.0767849	small	-0.235003	small	-0.239835	small	-0.0544378	small	-0.286893	small	0.0426459	small	-0.164802	small	-0.686662	medium	-0.187364	small	-0.235319	small	0.0842318	small	-0.111728	small	-0.672171	medium	0.0297408	small	-0.289033	small	0.126958	small
855	1790.96	1	33367.2	0.947135	large	0.651037	medium	0.676695	medium	1.74199	very large	0.723232	medium	0.849424	large	1.21238	very large	0.501062	medium	0.238473	small	0.233867	small	0.864017	large	0.14437	small	0.314332	small	0.609497	medium	-0.21339	small	-0.427532	small	-0.532745	medium	-0.331067	small	-0.123381	small	-0.944569	large	0.102173	small	-0.15628	small	0.397249	small
856	1791.96	1	43223	0.954048	large	0.664994	medium	0.689909	medium	1.78323	very large	0.749196	medium	0.871682	large	1.23248	very large	0.513914	medium	0.249357	small	0.239402	small	0.895178	large	0.17181	small	0.322578	small	0.615035	medium	-0.201591	small	-0.458163	small	-0.530639	medium	-0.357622	small	-0.152914	small	-0.962391	large	0.0818782	small	-0.137343	small	0.372901	small
857	1792.96	2	8960.33	1.02221	large	0.726006	medium	0.753688	medium	1.90862	very large	0.825366	large	0.996486	large	1.30144	very large	0.55618	medium	0.231922	small	0.212939	small	0.873119	large	0.165444	small	0.317592	small	0.577556	medium	-0.254622	small	-0.497253	small	-0.525589	medium	-0.386261	small	-0.181972	small	-1.01298	large	0.0552023	small	-0.128432	small	0.34446	small
858	1793.96	2	4341.96	1.01187	large	0.820403	large	0.84666	large	2.01174	very large	0.961163	large	1.21203	very large	1.3533	very large	0.614009	medium	0.205395	small	0.168102	small	0.753125	medium	0.181866	small	0.321596	small	0.479103	small	-0.31613	small	-0.507381	medium	-0.449893	small	-0.360717	small	-0.201645	small	-1.05363	large	-0.013349	small	-0.110248	small	0.254358	small
859	1795.03	3	1580.77	1.01476	large	0.815451	large	0.820302	large	1.81808	very large	0.95165	large	1.19602	large	1.21266	very large	0.531619	medium	0.0620821	small	0.00713899	small	0.504181	medium	0.0712297	small	0.218014	small	0.226794	small	-0.464316	small	-0.477437	small	-0.373213	small	-0.254519	small	-0.250542	small	-1.03104	large	-0.0640642	small	-0.130738	small	0.138189	small
860	1795.93	3	1635.37	0.844512	large	0.835411	large	0.827985	large	1.64562	very large	0.975312	large	1.16366	large	1.15648	large	0.560556	medium	0.141614	small	0.0951022	small	0.522733	medium	0.14915	small	0.297884	small	0.281086	small	-0.312424	small	-0.42262	small	-0.350004	small	-0.202956	small	-0.227607	small	-0.920812	large	-0.0553805	small	-0.143878	small	0.12548	small
861	1796.96	2	5842.28	0.632098	medium	0.882128	large	0.855262	large	1.46687	very large	1.03035	large	1.15469	large	1.11691	large	0.590393	medium	0.293388	small	0.245705	small	0.585211	medium	0.325502	small	0.438956	small	0.394841	small	-0.0928809	small	-0.350244	small	-0.267243	small	-0.136675	small	-0.194378	small	-0.767132	medium	-0.0819948	small	-0.122998	small	0.0716425	small
862	1797.96	5	550.29	0.931178	large	0.799533	medium	0.796131	medium	1.47673	very large	0.904354	large	1.16856	large	1.09556	large	0.51186	medium	-0.00994733	small	-0.0250182	small	0.224072	small	-0.0490259	small	0.236598	small	0.100743	small	-0.444003	small	-0.248241	small	-0.286607	small	0.0314052	small	-0.126567	small	-0.775187	medium	0.0233652	small	-0.290069	small	0.154255	small
863	1798.96	5	544.581	0.945296	large	0.838592	large	0.828893	large	1.48312	very large	0.997802	large	1.20162	very large	1.146	large	0.546894	medium	0.0131037	small	-0.0152857	small	0.216502	small	0.0215092	small	0.224633	small	0.135052	small	-0.430068	small	-0.234505	small	-0.201424	small	0.0207149	small	-0.0814797	small	-0.747509	medium	-0.0372276	small	-0.208747	small	0.116307	small
864	1804.99	2	7583.62	1.00619	large	0.956396	large	0.915919	large	1.81053	very large	1.33832	very large	1.25309	very large	1.3145	very large	0.661896	medium	0.210879	small	0.0897709	small	0.588746	medium	0.447512	small	0.298278	small	0.28855	small	-0.322314	small	-0.479075	small	-0.0789726	small	-0.249813	small	-0.294609	small	-0.932168	large	-0.370673	small	0.157564	small	-0.188588	small
865	1805.99	4	947.213	1.05259	large	0.69296	medium	0.717294	medium	1.92301	very large	0.791196	medium	1.11011	large	1.04865	large	0.440092	small	0.0422408	small	-0.0705855	small	0.902411	large	0.0148208	small	0.26639	small	-0.0154724	small	-0.572434	medium	-1.02029	large	-0.745484	medium	-0.547028	medium	-0.915279	large	-1.39451	very large	-0.078617	small	-0.215136	small	-0.0271462	small
866	1806.97	4	791.608	0.989085	large	0.740066	medium	0.745077	medium	1.83855	very large	0.872027	large	1.11532	large	1.07535	large	0.458285	small	0.0443001	small	-0.0485794	small	0.759218	medium	0.0310492	small	0.239884	small	0.0614882	small	-0.508418	medium	-0.841371	large	-0.653107	medium	-0.461122	small	-0.708271	medium	-1.25756	very large	-0.0768945	small	-0.190839	small	0.0233149	small
867	1807.97	4	643.33	0.949622	large	0.759003	medium	0.753214	medium	1.71163	very large	0.906281	large	1.069	large	1.09579	large	0.536237	medium	0.0418098	small	-0.00683755	small	0.572242	medium	-0.0148031	small	0.258656	small	0.0918903	small	-0.441048	small	-0.576147	medium	-0.578436	medium	-0.242322	small	-0.499054	small	-1.07066	large	0.00715802	small	-0.269426	small	0.105589	small
868	1808.98	5	559.861	0.957645	large	0.760533	medium	0.761752	medium	1.66277	very large	0.882025	large	1.09121	large	1.1124	large	0.570971	medium	0.00681309	small	-0.00716031	small	0.419725	small	-0.112078	small	0.280922	small	0.0559089	small	-0.442107	small	-0.414666	small	-0.560566	medium	-0.0773734	small	-0.39262	small	-0.961627	large	0.0957927	small	-0.384492	small	0.177476	small
869	1810	5	552.656	0.888997	large	0.738595	medium	0.750721	medium	1.42735	very large	0.789312	medium	1.1121	large	1.03242	large	0.484353	small	-0.0128042	small	-0.0155948	small	0.302132	small	-0.125342	small	0.277835	small	0.0599846	small	-0.440237	small	-0.318155	small	-0.451386	small	0.00220376	small	-0.262379	small	-0.832505	large	0.104752	small	-0.401573	small	0.195391	small
870	1811	5	494.975	0.843041	large	0.714508	medium	0.725965	medium	1.24711	very large	0.739919	medium	1.07539	large	0.959532	large	0.435683	small	-0.0249264	small	-0.0277798	small	0.215329	small	-0.103921	small	0.244709	small	0.0657002	small	-0.424617	small	-0.24366	small	-0.329776	small	0.0432788	small	-0.157531	small	-0.712516	medium	0.074701	small	-0.347883	small	0.174561	small
871	1812.99	2	7502.64	0.582158	medium	0.598075	medium	0.629542	medium	0.74641	medium	0.560914	medium	0.976382	large	0.753537	medium	0.354679	small	0.0240313	small	0.056198	small	0.0296967	small	-0.075035	small	0.33217	small	0.0771326	small	-0.253838	small	0.027399	small	-0.120136	small	0.319797	small	0.0530171	small	-0.33102	small	0.136159	small	-0.437753	small	0.170075	small
872	1813.99	4	642.395	0.929924	large	0.725931	medium	0.745063	medium	1.32296	very large	0.785623	medium	1.14881	large	1.01885	large	0.459231	small	-0.0651759	small	-0.0600153	small	0.115276	small	-0.143094	small	0.204069	small	0.0566475	small	-0.47026	small	-0.17609	small	-0.271324	small	0.0961364	small	-0.058385	small	-0.660578	medium	0.0809382	small	-0.348657	small	0.203081	small
873	1814.97	5	565.086	0.819916	large	0.703724	medium	0.709081	medium	1.1995	large	0.767177	medium	1.07313	large	0.952783	large	0.398506	small	-0.0184385	small	-0.0292582	small	0.167602	small	-0.0531066	small	0.227753	small	0.0921498	small	-0.431269	small	-0.198662	small	-0.226446	small	0.0694615	small	-0.0760073	small	-0.677955	medium	0.0240728	small	-0.282856	small	0.147484	small
874	1816.93	1	28964.7	0.438659	small	0.505868	medium	0.477105	small	0.905186	large	0.689119	medium	0.565186	medium	0.762067	medium	0.306512	small	0.202265	small	0.157626	small	0.472619	small	0.300867	small	0.229482	small	0.366085	small	-0.110087	small	-0.261441	small	-0.151547	small	-0.158289	small	-0.0964617	small	-0.55498	medium	-0.110258	small	0.0297701	small	0.057742	small
875	1817.94	1	20028.2	0.422802	small	0.498878	small	0.467508	small	0.907165	large	0.684222	medium	0.524804	medium	0.765381	medium	0.313477	small	0.206036	small	0.159513	small	0.486331	small	0.308502	small	0.202482	small	0.382503	small	-0.087675	small	-0.270651	small	-0.156547	small	-0.190718	small	-0.0927677	small	-0.547828	medium	-0.114704	small	0.0605826	small	0.0665024	small
876	1818.95	2	6802.97	0.574714	medium	0.582844	medium	0.560532	medium	1.03281	large	0.759114	medium	0.647807	medium	0.912392	large	0.369351	small	0.171862	small	0.129762	small	0.442566	small	0.243477	small	0.182634	small	0.38147	small	-0.166877	small	-0.266024	small	-0.173853	small	-0.19036	small	-0.052677	small	-0.577062	medium	-0.0915623	small	0.0362659	small	0.125667	small
877	1819.97	3	2717.28	0.96259	large	0.755898	medium	0.751206	medium	1.42419	very large	0.896451	large	0.996991	large	1.15314	large	0.467665	small	-0.000114229	small	-0.0410692	small	0.329049	small	-0.00164412	small	0.0851419	small	0.217175	small	-0.45441	small	-0.359459	small	-0.311885	small	-0.225372	small	-0.103683	small	-0.792693	medium	-0.0385941	small	-0.083114	small	0.209781	small
878	1820.97	3	1893.94	1.07876	large	0.734083	medium	0.790217	medium	1.40721	very large	0.872715	large	1.15775	large	1.1798	large	0.462519	small	-0.121688	small	-0.199483	small	0.350261	small	-0.150256	small	0.00843712	small	0.0174324	small	-0.645927	medium	-0.609134	medium	-0.477353	small	-0.351925	small	-0.348743	small	-0.95132	large	-0.0352862	small	-0.163388	small	0.173686	small
879	1821.97	2	8294.54	0.75519	medium	0.507338	medium	0.565365	medium	0.973446	large	0.560737	medium	0.80324	large	0.842472	large	0.222818	small	-0.096173	small	-0.182555	small	0.339915	small	-0.130417	small	-0.014101	small	0.0124728	small	-0.541286	medium	-0.598519	medium	-0.430883	small	-0.361122	small	-0.345822	small	-0.766619	medium	-0.0299667	small	-0.123482	small	0.150101	small
880	1822.93	4	1321.2	0.977778	large	0.629752	medium	0.711738	medium	1.15764	large	0.816057	large	1.03877	large	1.02484	large	0.405307	small	-0.0992443	small	-0.21784	small	0.378998	small	-0.088123	small	-0.0149618	small	-0.0332808	small	-0.612819	medium	-0.678622	medium	-0.437488	small	-0.397478	small	-0.415006	small	-0.844605	large	-0.113496	small	-0.0772128	small	0.0603524	small
881	1823.94	3	2518.73	-0.039621	small	-0.322438	small	-0.264046	small	-0.140556	small	-0.403096	small	-0.222557	small	-0.175671	small	-0.288406	small	-0.339819	small	-0.280277	small	-0.169458	small	-0.603415	medium	-0.296232	small	-0.195268	small	-0.360136	small	-0.11103	small	-0.431095	small	-0.106492	small	-0.0363095	small	-0.189926	small	0.230727	small	-0.352802	small	0.308411	small
882	1824.95	3	2865.85	-0.106573	small	-0.446931	small	-0.344936	small	-0.330684	small	-0.519911	medium	-0.325647	small	-0.261886	small	-0.30732	small	-0.395011	small	-0.286788	small	-0.40308	small	-0.701012	medium	-0.356543	small	-0.22789	small	-0.290825	small	0.0870078	small	-0.349649	small	0.0990834	small	0.12551	small	0.0607721	small	0.304091	small	-0.428563	small	0.364404	small
883	1825.96	4	926.476	0.0278226	small	-0.307007	small	-0.232211	small	-0.232066	small	-0.408436	small	-0.180232	small	-0.161009	small	-0.274748	small	-0.399826	small	-0.314062	small	-0.387029	small	-0.629408	medium	-0.291049	small	-0.247185	small	-0.39276	small	0.0488674	small	-0.26596	small	0.114937	small	0.109656	small	-0.0484756	small	0.24901	small	-0.359486	small	0.326145	small
884	1827.02	4	731.662	0.376592	small	-0.0971937	small	-0.0251784	small	-0.0856875	small	-0.303565	small	0.0817314	small	0.0253705	small	-0.168762	small	-0.512209	medium	-0.421918	small	-0.491809	small	-0.7306	medium	-0.303597	small	-0.371447	small	-0.559324	medium	0.0626483	small	-0.256843	small	0.181073	small	0.124429	small	-0.0942692	small	0.282221	small	-0.41221	small	0.359891	small
885	1828.03	4	847.404	0.697467	medium	0.187912	small	0.230833	small	0.273868	small	0.0460747	small	0.429697	small	0.328956	small	-0.016433	small	-0.478489	small	-0.422375	small	-0.427855	small	-0.60486	medium	-0.223569	small	-0.35985	small	-0.666711	medium	0.000578905	small	-0.199701	small	0.181892	small	0.0739195	small	-0.266476	small	0.181147	small	-0.357328	small	0.260893	small
886	1829.01	4	869.934	0.996918	large	0.598629	medium	0.620251	medium	1.0972	large	0.608983	medium	0.912773	large	0.907397	large	0.327528	small	-0.233045	small	-0.229833	small	-0.093061	small	-0.284544	small	-0.0131417	small	-0.0902534	small	-0.61604	medium	-0.142871	small	-0.203719	small	0.0721157	small	0.000355729	small	-0.580695	medium	0.0602948	small	-0.256755	small	0.200244	small
887	1830	5	606.647	1.05444	large	0.732698	medium	0.737942	medium	1.45047	very large	0.852971	large	1.05775	large	1.09542	large	0.467843	small	-0.116495	small	-0.149562	small	0.0656949	small	-0.0885105	small	0.0865237	small	-0.00701738	small	-0.572487	medium	-0.216429	small	-0.149645	small	0.0279757	small	-0.0761538	small	-0.730019	medium	-0.054196	small	-0.164926	small	0.0840103	small
888	1832.94	1	15274.3	0.31404	small	0.280372	small	0.235417	small	0.817711	large	0.300234	small	0.383862	small	0.4076	small	-0.0694024	small	-0.000937924	small	-0.0646955	small	0.461457	small	-0.0207642	small	0.0818633	small	0.0750381	small	-0.385275	small	-0.582586	medium	-0.495886	small	-0.35723	small	-0.407547	small	-0.877034	large	-0.04464	small	-0.103492	small	0.0986993	small
889	1833.96	1	32638.1	0.41835	small	0.293743	small	0.250841	small	0.704872	medium	0.307192	small	0.4728	small	0.317057	small	-0.0649055	small	-0.115452	small	-0.174865	small	0.292187	small	-0.133833	small	0.0714967	small	-0.106617	small	-0.552517	medium	-0.503509	medium	-0.439562	small	-0.210176	small	-0.396119	small	-0.892193	large	-0.0441379	small	-0.202257	small	0.0230151	small
890	1834.97	1	40675.1	0.47564	small	0.326758	small	0.287943	small	0.712769	medium	0.338898	small	0.520637	medium	0.346536	small	-0.0255845	small	-0.137421	small	-0.193375	small	0.253544	small	-0.155508	small	0.0664022	small	-0.127797	small	-0.586498	medium	-0.471015	small	-0.412666	small	-0.177532	small	-0.370555	small	-0.879226	large	-0.0403354	small	-0.21606	small	0.0219127	small
891	1836.11	5	493.5	0.631589	medium	0.383892	small	0.361896	small	0.847835	large	0.380773	small	0.603283	medium	0.462754	small	0.0490167	small	-0.203026	small	-0.255739	small	0.20964	small	-0.243846	small	-0.00680602	small	-0.172128	small	-0.625309	medium	-0.486929	small	-0.443872	small	-0.206996	small	-0.375753	small	-0.858034	large	-0.00478857	small	-0.228629	small	0.0742212	small
892	1836.97	3	1635.93	0.775503	medium	0.442762	small	0.428301	small	0.932131	large	0.440997	small	0.733677	medium	0.543676	medium	0.0824395	small	-0.251246	small	-0.295746	small	0.134717	small	-0.292888	small	-0.00488307	small	-0.218079	small	-0.713818	medium	-0.435076	small	-0.411654	small	-0.131423	small	-0.343872	small	-0.873436	large	0.00564577	small	-0.275126	small	0.0799237	small
893	1838.97	3	2406.3	0.675922	medium	0.132709	small	0.177746	small	0.265986	small	-0.0621747	small	0.326645	small	0.140056	small	0.088582	small	-0.596153	medium	-0.519206	medium	-0.389535	small	-0.715567	medium	-0.317961	small	-0.57054	medium	-0.550928	medium	-0.0631646	small	-0.341956	small	0.0811849	small	-0.15071	small	-0.151488	small	0.231146	small	-0.378944	small	0.219337	small
894	1839.94	3	2524.18	0.707882	medium	0.208469	small	0.245481	small	0.353446	small	0.059886	small	0.387294	small	0.241865	small	0.151346	small	-0.537849	medium	-0.48346	small	-0.346496	small	-0.64265	medium	-0.317095	small	-0.507311	medium	-0.520726	medium	-0.0834377	small	-0.294452	small	0.0476952	small	-0.131581	small	-0.16805	small	0.191651	small	-0.329677	small	0.182373	small
895	1840.94	3	3711.55	0.729885	medium	0.309361	small	0.348006	small	0.443043	small	0.191558	small	0.505851	medium	0.386804	small	0.229639	small	-0.404701	small	-0.363129	small	-0.295843	small	-0.515767	medium	-0.20978	small	-0.380031	small	-0.456893	small	-0.0470112	small	-0.220752	small	0.0891604	small	-0.0629638	small	-0.164518	small	0.165909	small	-0.302028	small	0.17129	small
896	1841.96	4	884.238	0.930629	large	0.521711	medium	0.533265	medium	0.920444	large	0.515664	medium	0.823744	large	0.699721	medium	0.308762	small	-0.228933	small	-0.200645	small	-0.107312	small	-0.366366	small	0.107429	small	-0.258359	small	-0.57333	medium	-0.105537	small	-0.270198	small	0.176425	small	-0.157166	small	-0.494467	small	0.121415	small	-0.394883	small	0.127158	small
897	1842.98	4	1192.8	0.783411	medium	0.576258	medium	0.629591	medium	0.799789	medium	0.488644	small	0.77928	medium	1.00046	large	0.41908	small	-0.0433708	small	0.024818	small	-0.0779621	small	-0.267706	small	0.172025	small	0.210601	small	-0.3432	small	0.0874032	small	-0.202039	small	0.214578	small	0.288485	small	-0.284387	small	0.24935	small	-0.380604	small	0.474246	small
898	1844.93	2	9531.26	0.630525	medium	0.213965	small	0.326171	small	0.178233	small	-0.111943	small	0.302409	small	0.526529	medium	0.237832	small	-0.424015	small	-0.305508	small	-0.422337	small	-0.679134	medium	-0.311123	small	-0.170705	small	-0.375195	small	0.167016	small	-0.273159	small	0.129935	small	0.329132	small	0.0701646	small	0.408969	small	-0.380569	small	0.60121	medium
899	1845.93	4	1329.83	0.630021	medium	0.0666102	small	0.169614	small	0.0989808	small	-0.303033	small	0.167973	small	0.266943	small	0.0918984	small	-0.68159	medium	-0.537004	medium	-0.488299	small	-0.860285	large	-0.4873	small	-0.40707	small	-0.51834	medium	0.0764195	small	-0.49602	small	0.07235	small	0.173319	small	0.000809858	small	0.451259	small	-0.522122	medium	0.61826	medium
900	1846.95	4	980.55	0.732236	medium	0.184718	small	0.275322	small	0.22904	small	-0.134386	small	0.34804	small	0.371561	small	0.142489	small	-0.624018	medium	-0.496609	small	-0.500535	medium	-0.876794	large	-0.405531	small	-0.405218	small	-0.567555	medium	0.0629464	small	-0.428507	small	0.131436	small	0.151876	small	-0.069034	small	0.408295	small	-0.515562	medium	0.551605	medium
901	1847.97	4	862.739	0.87622	large	0.394786	small	0.456148	small	0.516896	medium	0.211368	small	0.623122	medium	0.641897	medium	0.228061	small	-0.454863	small	-0.37513	small	-0.405461	small	-0.642121	medium	-0.217153	small	-0.267943	small	-0.610779	medium	0.0342315	small	-0.262176	small	0.17487	small	0.161389	small	-0.230474	small	0.262728	small	-0.404538	small	0.405332	small
902	1848.98	3	1886.21	0.864161	large	0.478067	small	0.509078	medium	0.749825	medium	0.386812	small	0.6964	medium	0.73189	medium	0.242265	small	-0.32876	small	-0.29544	small	-0.194028	small	-0.445866	small	-0.121142	small	-0.160275	small	-0.605783	medium	-0.103169	small	-0.271166	small	0.0615278	small	0.0385548	small	-0.451973	small	0.151783	small	-0.305625	small	0.302792	small
903	1850	4	832.393	0.993323	large	0.631418	medium	0.651	medium	1.06319	large	0.62232	medium	0.95795	large	0.912108	large	0.323016	small	-0.265635	small	-0.258308	small	-0.0866536	small	-0.333456	small	-0.00851072	small	-0.119538	small	-0.673201	medium	-0.174583	small	-0.261422	small	0.0749084	small	-0.0339314	small	-0.663971	medium	0.0821752	small	-0.316664	small	0.226401	small
904	1850.98	1	10936.1	0.716368	medium	0.495865	small	0.486432	small	0.605658	medium	0.568961	medium	0.656992	medium	0.700654	medium	0.201306	small	-0.224302	small	-0.24125	small	-0.18057	small	-0.167549	small	-0.07055	small	-0.098366	small	-0.533092	medium	-0.0485719	small	0.0164555	small	0.112861	small	0.105496	small	-0.399653	small	-0.0642736	small	-0.0969983	small	0.0826431	small
905	1852.99	5	596.946	1.00865	large	0.632143	medium	0.607086	medium	1.04709	large	0.794103	medium	0.933602	large	0.828094	large	0.290979	small	-0.267732	small	-0.316018	small	-0.123251	small	-0.176183	small	-0.0229627	small	-0.242505	small	-0.709734	medium	-0.194967	small	-0.0588247	small	0.0927492	small	-0.124915	small	-0.666117	medium	-0.129395	small	-0.146253	small	-0.0526911	small
906	1854	5	599.292	0.382821	small	0.302014	small	0.261539	small	0.286981	small	0.241693	small	0.393629	small	0.255045	small	0.00655569	small	-0.393918	small	-0.362453	small	-0.17417	small	-0.260168	small	-0.144246	small	-0.250068	small	-0.41797	small	-0.19226	small	-0.15393	small	0.1422	small	-0.142879	small	-0.76043	medium	-0.0433596	small	-0.280239	small	0.0245941	small
907	1854.97	4	1010.25	0.369909	small	0.311834	small	0.27665	small	0.353132	small	0.24279	small	0.379203	small	0.320076	small	0.0131357	small	-0.33165	small	-0.313885	small	-0.112431	small	-0.236849	small	-0.133274	small	-0.183104	small	-0.398835	small	-0.25993	small	-0.240099	small	-0.0074419	small	-0.123381	small	-0.703884	medium	-0.0132597	small	-0.226454	small	0.128121	small
908	1855.97	4	1285.23	0.543037	medium	0.413758	small	0.449557	small	0.606211	medium	0.437596	small	0.658226	medium	0.567064	medium	0.145488	small	-0.118717	small	-0.186794	small	-0.0474243	small	-0.0158196	small	0.0302712	small	-0.099918	small	-0.449466	small	-0.147067	small	0.0225269	small	0.0921558	small	-0.0609569	small	-0.545226	medium	-0.144176	small	-0.042498	small	-0.0644427	small
909	1856.98	4	1012.2	0.650326	medium	0.428566	small	0.507615	medium	0.705064	medium	0.457505	small	0.74884	medium	0.669518	medium	0.218898	small	-0.0415855	small	-0.113558	small	-0.0180526	small	0.062649	small	0.12638	small	-0.0420301	small	-0.458524	small	-0.0971679	small	0.065959	small	0.141449	small	-0.0247849	small	-0.49688	small	-0.160054	small	-0.0220651	small	-0.0893736	small
910	1857.99	4	709.864	0.595949	medium	0.430088	small	0.459478	small	0.593122	medium	0.466851	small	0.677034	medium	0.593005	medium	0.190841	small	-0.0612114	small	-0.10951	small	-0.0465344	small	0.0248957	small	0.108236	small	-0.0378458	small	-0.416707	small	-0.0643841	small	0.0545111	small	0.149719	small	0.0107552	small	-0.402093	small	-0.120626	small	-0.0594159	small	-0.0531806	small
911	1859	5	537.791	0.632295	medium	0.503252	medium	0.485522	small	0.65881	medium	0.622411	medium	0.738485	medium	0.623003	medium	0.208732	small	-0.0626186	small	-0.106307	small	-0.0409371	small	0.0410458	small	0.135592	small	-0.0515225	small	-0.42663	small	-0.067478	small	0.0771677	small	0.171972	small	-0.0102893	small	-0.426301	small	-0.145092	small	-0.0879256	small	-0.0902051	small
912	1860.01	5	617.316	0.863278	large	0.734193	medium	0.697077	medium	1.47293	very large	0.954632	large	0.98751	large	1.00322	large	0.414941	small	0.0256379	small	-0.0651574	small	0.369063	small	0.148581	small	0.177824	small	0.0513871	small	-0.464863	small	-0.443517	small	-0.190172	small	-0.156898	small	-0.347578	small	-0.931919	large	-0.218179	small	-0.0291169	small	-0.108389	small
913	1861.01	5	633.935	0.878267	large	0.736718	medium	0.701595	medium	1.46546	very large	0.931073	large	0.961189	large	0.995268	large	0.439287	small	0.0106698	small	-0.0750462	small	0.387322	small	0.108944	small	0.132761	small	0.0601792	small	-0.44479	small	-0.47098	small	-0.25069	small	-0.223935	small	-0.34549	small	-0.901382	large	-0.185221	small	-0.0232392	small	-0.0560039	small
914	1861.89	3	2385.74	0.510433	medium	-0.0812134	small	-0.0399165	small	0.180722	small	-0.338574	small	0.0776802	small	-0.124309	small	-0.0886434	small	-0.747932	medium	-0.643827	medium	-0.3331	small	-0.627769	medium	-0.425433	small	-0.534393	medium	-0.526096	medium	-0.229361	small	-0.618625	medium	-0.0851662	small	-0.326751	small	-0.286238	small	0.272965	small	-0.393767	small	0.252132	small
915	1862.88	3	2281.26	0.539152	medium	-0.0644949	small	-0.0139396	small	0.172309	small	-0.34465	small	0.101783	small	-0.0854918	small	-0.0717341	small	-0.775617	medium	-0.662609	medium	-0.359641	small	-0.656274	medium	-0.440431	small	-0.544585	medium	-0.544902	medium	-0.192529	small	-0.613034	medium	-0.0561146	small	-0.2765	small	-0.256223	small	0.30348	small	-0.426941	small	0.308384	small
916	1863.83	4	1408.74	0.624822	medium	0.0640346	small	0.107165	small	0.318741	small	-0.195818	small	0.224619	small	0.106212	small	-0.00877213	small	-0.778934	medium	-0.67235	medium	-0.361571	small	-0.694933	medium	-0.448574	small	-0.54153	medium	-0.598842	medium	-0.211481	small	-0.603063	medium	-0.0683528	small	-0.234251	small	-0.335229	small	0.290778	small	-0.424613	small	0.352005	small
917	1865.03	4	806.093	0.848663	large	0.370685	small	0.389188	small	0.707469	medium	0.254708	small	0.552816	medium	0.546171	medium	0.152154	small	-0.63852	medium	-0.593196	medium	-0.287389	small	-0.648051	medium	-0.38681	small	-0.446648	small	-0.702801	medium	-0.26071	small	-0.445917	small	-0.0945844	small	-0.163124	small	-0.521283	medium	0.163042	small	-0.317022	small	0.290287	small
918	1866.06	2	8189.17	0.194111	small	-0.608761	medium	-0.473477	small	-0.444162	small	-0.70726	medium	-0.442007	small	-0.507325	medium	-0.297617	small	-0.772482	medium	-0.622142	medium	-0.4584	small	-0.678708	medium	-0.502446	medium	-0.547368	medium	-0.409729	small	0.102253	small	-0.520764	medium	0.0694202	small	-0.0281922	small	0.226781	small	0.388808	small	-0.45143	small	0.360894	small
919	1866.21	5	216.44	0.281502	small	-0.4429	small	-0.339781	small	-0.303786	small	-0.543277	medium	-0.298195	small	-0.384432	small	-0.212855	small	-0.755784	medium	-0.620391	medium	-0.426586	small	-0.631161	medium	-0.475452	small	-0.531185	medium	-0.426231	small	0.0530046	small	-0.436716	small	0.0483405	small	-0.0751736	small	0.142562	small	0.336551	small	-0.397072	small	0.323073	small
920	1867.06	2	8021.01	0.193507	small	-0.608172	medium	-0.473165	small	-0.448484	small	-0.703382	medium	-0.440804	small	-0.509727	medium	-0.296291	small	-0.772302	medium	-0.622054	medium	-0.46167	small	-0.677346	medium	-0.502117	medium	-0.549558	medium	-0.40888	small	0.108912	small	-0.500549	medium	0.0789032	small	-0.0240183	small	0.233747	small	0.382847	small	-0.445215	small	0.349419	small
921	1867.21	5	204.912	0.274438	small	-0.463347	small	-0.35578	small	-0.32689	small	-0.561733	medium	-0.314536	small	-0.406709	small	-0.217874	small	-0.760355	medium	-0.622535	medium	-0.434237	small	-0.635358	medium	-0.478868	small	-0.537948	medium	-0.422476	small	0.0684345	small	-0.430786	small	0.0618548	small	-0.0705401	small	0.167315	small	0.340424	small	-0.400581	small	0.313927	small
922	1868.06	3	3147.64	0.242582	small	-0.515429	medium	-0.397168	small	-0.372764	small	-0.634192	medium	-0.356081	small	-0.437032	small	-0.263415	small	-0.781279	medium	-0.635113	medium	-0.466163	small	-0.700037	medium	-0.503495	medium	-0.562013	medium	-0.441403	small	0.0737	small	-0.469159	small	0.0707736	small	-0.0418102	small	0.162022	small	0.362673	small	-0.436672	small	0.344515	small
923	1869.05	4	1272.37	0.378143	small	-0.20086	small	-0.151483	small	-0.0239699	small	-0.368429	small	-0.0910935	small	-0.199172	small	-0.133728	small	-0.682727	medium	-0.597413	medium	-0.358617	small	-0.692179	medium	-0.461013	small	-0.556005	medium	-0.484701	small	-0.133853	small	-0.433414	small	-0.0738968	small	-0.210321	small	-0.115885	small	0.254526	small	-0.352763	small	0.243579	small
924	1870.02	4	810.964	0.664996	medium	0.302112	small	0.298646	small	0.693042	medium	0.250105	small	0.46632	small	0.389814	small	0.110732	small	-0.330357	small	-0.364538	small	0.0199306	small	-0.382819	small	-0.207146	small	-0.320402	small	-0.506227	medium	-0.386074	small	-0.388975	small	-0.219893	small	-0.339769	small	-0.509697	medium	0.0478992	small	-0.187981	small	0.0990812	small
925	1874.04	2	6513.77	0.809487	large	0.684682	medium	0.66879	medium	1.04136	large	0.847966	large	0.878677	large	0.957211	large	0.477799	small	-0.0216242	small	-0.060127	small	0.0903629	small	0.0458878	small	0.0459989	small	0.0428942	small	-0.239263	small	-0.15196	small	-0.0426075	small	-0.0447002	small	-0.0569094	small	-0.323467	small	-0.106513	small	0.000792358	small	-0.00728128	small
926	1876.05	5	526.175	0.951126	large	0.864661	large	0.861267	large	1.38074	very large	1.05857	large	1.16749	large	1.18747	large	0.673076	medium	0.0213705	small	-0.00545378	small	0.0690558	small	0.0776426	small	0.179202	small	0.0920294	small	-0.281945	small	-0.076045	small	0.0131276	small	0.121875	small	0.0254005	small	-0.394552	small	-0.0863826	small	-0.10459	small	0.00965426	small
927	1877.04	5	593.754	0.787207	medium	0.800438	large	0.788051	medium	1.12857	large	0.922134	large	1.05751	large	1.0362	large	0.531509	medium	0.0182543	small	-0.00125459	small	0.0997334	small	0.0405557	small	0.198418	small	0.117332	small	-0.329664	small	-0.111163	small	-0.0680767	small	0.111086	small	0.01763	small	-0.528157	medium	-0.0449174	small	-0.173852	small	0.0838501	small
928	1878.03	4	737.494	0.923926	large	0.825356	large	0.829039	large	1.45592	very large	0.97364	large	1.25747	very large	1.20035	very large	0.569113	medium	-0.265949	small	-0.233593	small	-0.156391	small	-0.288617	small	0.107566	small	-0.190835	small	-0.59456	medium	-0.0578518	small	-0.177098	small	0.316476	small	-0.0270219	small	-0.767306	medium	0.0895006	small	-0.473124	small	0.148406	small
929	1879.02	5	552.903	0.952545	large	0.842387	large	0.848671	large	1.59326	very large	0.991928	large	1.28183	very large	1.26575	very large	0.596797	medium	-0.255251	small	-0.22299	small	-0.138555	small	-0.289851	small	0.117664	small	-0.166175	small	-0.611239	medium	-0.0728448	small	-0.207478	small	0.301916	small	-0.0210843	small	-0.841303	large	0.0997333	small	-0.477767	small	0.181866	small
930	1880.03	5	396.267	0.965929	large	0.838078	large	0.842789	large	1.52599	very large	0.944841	large	1.2433	very large	1.20217	very large	0.54596	medium	-0.165532	small	-0.159733	small	-0.0116277	small	-0.198055	small	0.141713	small	-0.0539452	small	-0.586043	medium	-0.163523	small	-0.235674	small	0.17372	small	-0.0538436	small	-0.870207	large	0.0525396	small	-0.375737	small	0.178402	small
931	1881.03	5	427.628	0.848127	large	0.798018	medium	0.789646	medium	1.23861	very large	0.973347	large	1.12706	large	1.06786	large	0.475107	small	0.000948189	small	-0.057488	small	0.0832596	small	0.118858	small	0.194815	small	0.0728267	small	-0.465319	small	-0.154543	small	0.0447568	small	0.125484	small	-0.0139256	small	-0.719298	medium	-0.191384	small	-0.0706726	small	-0.0578849	small
932	1882.03	5	587.846	0.894427	large	0.691286	medium	0.687275	medium	1.14175	large	0.812218	large	0.970387	large	0.931243	large	0.399841	small	-0.0791941	small	-0.135566	small	0.0606117	small	0.0149168	small	0.0840164	small	0.00460462	small	-0.52256	medium	-0.201222	small	-0.038164	small	0.0278529	small	-0.0581561	small	-0.675327	medium	-0.144799	small	-0.0624769	small	-0.0110072	small
933	1883.03	5	482.769	0.895584	large	0.691922	medium	0.691369	medium	1.14193	large	0.772784	medium	0.951713	large	0.960687	large	0.402005	small	-0.0903172	small	-0.123812	small	0.0746348	small	-0.0566357	small	0.0651727	small	0.0496908	small	-0.513216	medium	-0.201574	small	-0.126581	small	-0.00551899	small	-0.0235517	small	-0.667632	medium	-0.0614438	small	-0.117625	small	0.104087	small
934	1884.03	4	1071.75	1.14796	large	0.674329	medium	0.829629	large	1.62593	very large	0.892269	large	1.14257	large	1.2877	very large	0.594873	medium	0.0457206	small	-0.135762	small	0.0374638	small	0.338211	small	0.02453	small	0.101653	small	-0.576097	medium	-0.176347	small	0.279838	small	-0.0108105	small	0.0681343	small	-0.714387	medium	-0.512852	medium	0.319325	small	-0.282314	small
935	1885.03	4	1128.45	1.11676	large	0.647806	medium	0.798311	medium	1.57216	very large	0.881491	large	1.08829	large	1.24727	very large	0.567146	medium	0.0584906	small	-0.131555	small	0.0462817	small	0.362954	small	0.0183452	small	0.09539	small	-0.54226	medium	-0.179862	small	0.296773	small	-0.0251446	small	0.0525112	small	-0.669152	medium	-0.540632	medium	0.346648	small	-0.312573	small
936	1886.02	3	3830.74	0.89125	large	0.697698	medium	0.780707	medium	1.21478	very large	0.927122	large	1.03114	large	1.12136	large	0.526318	medium	0.0873572	small	-0.0532248	small	0.0685455	small	0.362476	small	0.117563	small	0.1248	small	-0.420898	small	-0.127505	small	0.288763	small	0.0547138	small	0.0602287	small	-0.57883	medium	-0.485225	small	0.282279	small	-0.290304	small
937	1887.03	5	396.774	0.934217	large	0.69296	medium	0.700584	medium	1.19385	large	0.866768	large	1.00223	large	0.981978	large	0.414628	small	-0.0524813	small	-0.142051	small	0.0403785	small	0.1172	small	0.0789936	small	-0.00326321	small	-0.522858	medium	-0.186982	small	0.0811587	small	0.0419915	small	-0.0462693	small	-0.640767	medium	-0.258359	small	0.0486414	small	-0.122434	small
938	1888.04	4	741.94	0.828783	large	0.46995	small	0.479865	small	0.742047	medium	0.412827	small	0.769845	medium	0.5563	medium	0.196804	small	-0.319691	small	-0.315603	small	-0.128721	small	-0.38754	small	-0.00957365	small	-0.324975	small	-0.635799	medium	-0.187364	small	-0.267329	small	0.108552	small	-0.202153	small	-0.538018	medium	0.0796357	small	-0.355352	small	0.0957185	small
939	1889.04	4	1302.8	0.988619	large	0.621916	medium	0.625118	medium	1.17022	large	0.609494	medium	0.942497	large	0.815035	large	0.314181	small	-0.28902	small	-0.304461	small	0.0384093	small	-0.35521	small	-0.0321571	small	-0.211947	small	-0.678965	medium	-0.352599	small	-0.409963	small	-0.0702109	small	-0.264755	small	-0.794644	medium	0.0607211	small	-0.318168	small	0.157597	small
940	1890.03	4	1267.73	1.05342	large	0.719286	medium	0.721587	medium	1.4958	very large	0.769132	medium	1.06882	large	0.995003	large	0.420122	small	-0.201507	small	-0.236853	small	0.185299	small	-0.244845	small	-0.000233023	small	-0.0898486	small	-0.635721	medium	-0.441054	small	-0.440704	small	-0.186807	small	-0.286722	small	-0.921323	large	0.0180069	small	-0.245988	small	0.161651	small
941	1891.04	4	675.486	1.06369	large	0.781829	medium	0.786672	medium	1.63479	very large	0.868809	large	1.14777	large	1.10578	large	0.505841	medium	-0.107005	small	-0.153598	small	0.26034	small	-0.11311	small	0.0552413	small	0.00392915	small	-0.524374	medium	-0.426446	small	-0.361552	small	-0.205623	small	-0.26436	small	-0.852619	large	-0.0324414	small	-0.166802	small	0.119034	small
942	1891.75	2	5711.51	0.722128	medium	0.77152	medium	0.761963	medium	1.23373	very large	0.802403	large	0.995129	large	0.958258	large	0.516808	medium	0.0561359	small	0.0268386	small	0.294944	small	0.0471061	small	0.213875	small	0.12163	small	-0.254264	small	-0.294748	small	-0.258655	small	-0.0748963	small	-0.208029	small	-0.647261	medium	-0.0238105	small	-0.17283	small	0.0740911	small
943	1893.04	5	425.305	0.973364	large	0.808841	large	0.804771	large	1.57221	very large	0.890842	large	1.17551	large	1.08586	large	0.529759	medium	-0.0689664	small	-0.0919597	small	0.213866	small	-0.100327	small	0.17825	small	0.0059565	small	-0.483055	small	-0.319527	small	-0.334915	small	-0.0210325	small	-0.232513	small	-0.838385	large	0.0108332	small	-0.282771	small	0.113831	small
944	1894.55	2	5703.17	0.489682	small	0.642368	medium	0.635042	medium	0.853517	large	0.675045	medium	0.772479	medium	0.715564	medium	0.465663	small	0.149867	small	0.118393	small	0.297459	small	0.17914	small	0.248824	small	0.168333	small	-0.0667464	small	-0.208793	small	-0.110191	small	-0.0518735	small	-0.15775	small	-0.414732	small	-0.0800381	small	-0.0619511	small	-0.0281364	small
945	1896.05	5	486.7	0.908199	large	0.688191	medium	0.734478	medium	1.13434	large	0.793395	medium	1.0185	large	0.985801	large	0.503466	medium	-0.00628843	small	-0.0739113	small	0.242487	small	0.0658887	small	0.0953051	small	0.0520227	small	-0.360408	small	-0.333691	small	-0.142881	small	-0.156707	small	-0.199425	small	-0.567057	medium	-0.13836	small	-0.0137815	small	-0.0232618	small
946	1897.04	5	458.762	0.860558	large	0.699083	medium	0.702773	medium	1.15996	large	0.824695	large	0.968385	large	0.932124	large	0.462977	small	0.000198235	small	-0.0607077	small	0.199536	small	0.0886936	small	0.126398	small	0.0673786	small	-0.386299	small	-0.260318	small	-0.0837461	small	-0.0673028	small	-0.131697	small	-0.603685	medium	-0.149847	small	-0.0250214	small	-0.0294123	small
947	1898.04	5	458.809	0.879668	large	0.755806	medium	0.74221	medium	1.53186	very large	0.856681	large	0.973924	large	1.05694	large	0.482003	small	0.0365713	small	-0.0258996	small	0.442793	small	0.0725697	small	0.12226	small	0.178663	small	-0.401358	small	-0.458732	small	-0.316313	small	-0.292919	small	-0.24728	small	-0.913033	large	-0.0988127	small	-0.0417324	small	0.0916287	small
948	1899.06	4	1390.41	1.09236	large	0.523527	medium	0.521055	medium	1.50454	very large	0.726157	medium	0.73803	medium	0.906557	large	0.502682	medium	-0.19448	small	-0.174586	small	-0.253337	small	-0.241944	small	0.0784455	small	-0.109485	small	-0.76786	medium	0.0217027	small	-0.0135127	small	0.222729	small	0.127341	small	-0.776434	medium	0.032214	small	-0.249107	small	0.128729	small
949	1900.07	3	1541.59	1.06257	large	0.489929	small	0.491943	small	1.35638	very large	0.685872	medium	0.709596	medium	0.856136	large	0.480445	small	-0.20242	small	-0.17551	small	-0.301444	small	-0.261365	small	0.0815129	small	-0.130565	small	-0.76612	medium	0.055974	small	0.0163374	small	0.24998	small	0.153448	small	-0.696963	medium	0.0438939	small	-0.26241	small	0.126743	small
950	1901.12	4	1140.99	1.14749	large	0.605292	medium	0.605393	medium	1.4363	very large	0.80079	large	0.844205	large	1.0048	large	0.538604	medium	-0.175981	small	-0.163476	small	-0.20402	small	-0.20913	small	0.0972382	small	-0.0790073	small	-0.742347	medium	0.000877821	small	-0.0260309	small	0.219586	small	0.113665	small	-0.71747	medium	0.0225141	small	-0.251286	small	0.128185	small
951	1902.04	4	772.507	1.10633	large	0.735134	medium	0.746969	medium	1.37691	very large	0.867089	large	1.03277	large	1.12499	large	0.542031	medium	-0.110134	small	-0.111318	small	-0.0328626	small	-0.133712	small	0.121015	small	0.0555477	small	-0.624622	medium	-0.0819388	small	-0.105292	small	0.142351	small	0.0877434	small	-0.699955	medium	0.0179349	small	-0.232875	small	0.18304	small
952	1903.04	5	430.232	0.992806	large	0.763131	medium	0.795849	medium	1.46977	very large	0.77733	medium	1.1321	large	1.15411	large	0.50425	medium	-0.0565039	small	-0.0573966	small	0.195955	small	-0.142284	small	0.162463	small	0.136331	small	-0.520252	medium	-0.251889	small	-0.332876	small	-0.020705	small	-0.0552858	small	-0.819666	large	0.0863823	small	-0.294661	small	0.274234	small
953	1905.04	5	413.64	0.897126	large	0.690288	medium	0.712057	medium	1.31688	very large	0.668428	medium	1.01244	large	0.986471	large	0.432852	small	-0.0977261	small	-0.0941831	small	0.176483	small	-0.203533	small	0.133208	small	0.0422774	small	-0.492285	small	-0.275912	small	-0.395615	small	-0.0310809	small	-0.139723	small	-0.774501	medium	0.110784	small	-0.33053	small	0.252567	small
954	1906.06	4	754.984	1.08555	large	0.707075	medium	0.769392	medium	1.56426	very large	0.681651	medium	1.10655	large	1.17003	large	0.549761	medium	-0.104531	small	-0.110404	small	0.320947	small	-0.265969	small	0.170959	small	-0.0091391	small	-0.579758	medium	-0.440041	small	-0.553502	medium	-0.121033	small	-0.347974	small	-0.940396	large	0.155617	small	-0.401114	small	0.269329	small
955	1907.05	4	867.803	1.14817	large	0.705454	medium	0.762693	medium	1.558	very large	0.703089	medium	1.11385	large	1.13228	large	0.585763	medium	-0.318372	small	-0.329307	small	0.0165169	small	-0.391357	small	-0.0187133	small	-0.297119	small	-0.675841	medium	-0.365001	small	-0.430052	small	-0.0351227	small	-0.359208	small	-0.822483	large	0.105491	small	-0.36743	small	0.148699	small
956	1908.07	4	1344.29	1.17147	large	0.702601	medium	0.839457	large	2.1177	very large	0.650681	medium	1.1627	large	1.38589	very large	0.744347	medium	0.0119602	small	-0.0930735	small	0.931265	large	-0.0917091	small	0.19537	small	-0.0257003	small	-0.545367	medium	-1.16692	large	-0.816188	large	-0.659762	medium	-1.01753	large	-1.4619	very large	0.023293	small	-0.240115	small	0.0777921	small
957	1909.06	4	1365.71	1.13978	large	0.721243	medium	0.884664	large	2.19163	very large	0.678887	medium	1.16952	large	1.42624	very large	0.80615	large	0.161633	small	0.0797293	small	1.24143	very large	0.0448198	small	0.297197	small	0.267893	small	-0.393526	small	-1.3547	very large	-0.922717	large	-0.865646	large	-1.03898	large	-1.55782	very large	0.0163078	small	-0.179394	small	0.134892	small
958	1910.06	3	1608.25	0.982246	large	0.765054	medium	0.876624	large	2.20779	very large	0.765516	medium	1.1425	large	1.35032	very large	0.732626	medium	0.226174	small	0.161437	small	1.27688	very large	0.120415	small	0.317361	small	0.41743	small	-0.28132	small	-1.25718	very large	-0.933766	large	-0.892565	large	-0.891056	large	-1.53501	very large	0.0151777	small	-0.138835	small	0.202719	small
959	1911.05	3	3761.92	0.800036	large	0.857173	large	0.8482	large	2.00968	very large	1.01177	large	1.04767	large	1.26277	very large	0.639338	medium	0.264752	small	0.187079	small	1.0038	large	0.283964	small	0.288707	small	0.463066	small	-0.204989	small	-0.816642	large	-0.633307	medium	-0.644193	medium	-0.505924	medium	-1.28806	very large	-0.10105	small	0.00172446	small	0.152148	small
960	1913.08	2	8015.36	1.03813	large	0.637496	medium	0.628233	medium	1.22787	very large	0.903413	large	0.925472	large	0.919097	large	0.484458	small	-0.0981392	small	-0.161245	small	0.2261	small	-0.0647066	small	-0.174886	small	0.149047	small	-0.644741	medium	-0.382264	small	-0.275618	small	-0.387156	small	-0.0516862	small	-0.829037	large	-0.0978626	small	0.100493	small	0.198545	small
961	1914.08	4	1177.96	1.12492	large	0.517267	medium	0.522685	medium	1.056	large	0.70888	medium	0.884092	large	0.767087	medium	0.362141	small	-0.298358	small	-0.344922	small	-0.0167235	small	-0.312053	small	-0.338108	small	-0.0448706	small	-0.838833	large	-0.30808	small	-0.259292	small	-0.282658	small	-0.0251809	small	-0.753844	medium	-0.0369659	small	-0.00341225	small	0.208958	small
962	1915.07	4	1121.13	1.14554	large	0.604641	medium	0.6172	medium	1.25336	very large	0.734368	medium	1.00912	large	0.906221	large	0.31041	small	-0.289507	small	-0.321759	small	0.00996702	small	-0.326769	small	-0.165267	small	-0.0604974	small	-0.853627	large	-0.325343	small	-0.320186	small	-0.167166	small	-0.0640922	small	-0.890505	large	0.0066687	small	-0.171168	small	0.233391	small
963	1916.05	4	788.388	0.970572	large	0.734918	medium	0.751059	medium	1.57691	very large	0.843842	large	1.15569	large	1.13652	large	0.450191	small	-0.253287	small	-0.224437	small	-0.0639573	small	-0.338072	small	-0.00580725	small	-0.0100343	small	-0.671897	medium	-0.170009	small	-0.355741	small	0.068585	small	0.0632283	small	-0.93993	large	0.133276	small	-0.379228	small	0.371881	small
964	1920.04	2	7094.63	0.867286	large	0.817426	large	0.838436	large	1.54268	very large	0.904719	large	1.13188	large	1.34485	very large	0.541994	medium	-0.04681	small	-0.0239551	small	0.0929685	small	-0.156411	small	0.0824969	small	0.278206	small	-0.480299	small	-0.132758	small	-0.320614	small	-0.0117734	small	0.211181	small	-0.833047	large	0.143655	small	-0.274484	small	0.497071	small
965	1921.04	4	692.352	1.06853	large	0.818872	large	0.858469	large	1.55084	very large	0.836843	large	1.17404	large	1.36306	very large	0.560059	medium	-0.08504	small	-0.0448775	small	0.0379729	small	-0.244644	small	0.0820143	small	0.263222	small	-0.528004	medium	-0.0826216	small	-0.315598	small	0.0496892	small	0.238665	small	-0.679833	medium	0.190449	small	-0.330139	small	0.514871	medium
966	1922.06	5	560.711	1.02171	large	0.723624	medium	0.75681	medium	1.19513	large	0.72756	medium	1.06577	large	1.16839	large	0.412179	small	-0.161808	small	-0.127611	small	-0.0887453	small	-0.276804	small	0.0693383	small	0.109628	small	-0.607202	medium	-0.0446505	small	-0.208626	small	0.156013	small	0.205796	small	-0.611354	medium	0.141979	small	-0.339048	small	0.392383	small
967	1923.05	5	484.349	0.906909	large	0.680715	medium	0.698943	medium	1.07362	large	0.708161	medium	0.994949	large	1.0343	large	0.35895	small	-0.127034	small	-0.112755	small	-0.0423113	small	-0.18879	small	0.101875	small	0.0809597	small	-0.560046	medium	-0.0739515	small	-0.159822	small	0.145472	small	0.130369	small	-0.612008	medium	0.0752641	small	-0.287097	small	0.276345	small
968	1924.46	2	4944.63	0.373216	small	0.507	medium	0.552416	medium	0.553237	medium	0.436351	small	0.580196	medium	0.876618	large	0.331691	small	0.152429	small	0.193389	small	0.117242	small	0.0370533	small	0.175205	small	0.46065	small	-0.0706528	small	0.0798089	small	-0.0875551	small	0.06097	small	0.348629	small	-0.211897	small	0.162236	small	-0.146984	small	0.447013	small
969	1927.1	1	10717.5	0.973692	large	0.552193	medium	0.574622	medium	1.11203	large	0.994632	large	0.904264	large	0.975196	large	0.577375	medium	0.134357	small	0.172795	small	0.322563	small	-0.103971	small	-0.215119	small	0.533066	medium	0.0243383	small	-0.059853	small	-0.422729	small	-0.498036	small	0.256485	small	-0.215944	small	0.227207	small	0.123035	small	0.59454	medium
970	1929.09	4	899.711	1.21424	very large	0.67712	medium	0.675007	medium	1.37753	very large	0.973865	large	1.05548	large	1.02588	large	0.657697	medium	0.0192663	small	0.00933019	small	0.156105	small	0.010007	small	-0.186113	small	0.351241	small	-0.326165	small	-0.109316	small	-0.125347	small	-0.325359	small	0.203792	small	-0.431339	small	0.00110359	small	0.168921	small	0.326636	small
971	1930.05	2	8691.33	0.867583	large	0.441206	small	0.48714	small	0.690571	medium	0.347057	small	0.60495	medium	0.791272	medium	0.26378	small	-0.268713	small	-0.207706	small	-0.186748	small	-0.507584	medium	-0.245464	small	0.0798706	small	-0.551966	medium	-0.0284255	small	-0.305955	small	-0.0479817	small	0.221975	small	-0.352682	small	0.228803	small	-0.255522	small	0.499384	small
972	1931.04	4	1114.83	1.26143	very large	0.683638	medium	0.744645	medium	1.16532	large	0.623395	medium	1.2325	very large	1.02829	large	0.428503	small	-0.468096	small	-0.3594	small	-0.424778	small	-0.730245	medium	0.0398944	small	-0.312567	small	-0.900354	large	0.0660774	small	-0.354407	small	0.434535	small	0.134999	small	-0.605368	medium	0.325815	small	-0.733047	medium	0.444088	small
973	1932.08	1	13977.6	0.224049	small	-0.556374	medium	-0.439378	small	-0.339597	small	-0.646058	medium	-0.271921	small	-0.478789	small	-0.37479	small	-0.830434	large	-0.682168	medium	-0.46155	small	-0.749443	medium	-0.45028	small	-0.617177	medium	-0.540278	medium	0.00506281	small	-0.569463	medium	0.122843	small	-0.16963	small	0.00998441	small	0.405627	small	-0.549976	medium	0.380363	small
974	1933.08	2	9434.35	0.195424	small	-0.581033	medium	-0.465906	small	-0.350682	small	-0.652023	medium	-0.305539	small	-0.499162	small	-0.383782	small	-0.808313	large	-0.666087	medium	-0.444083	small	-0.72338	medium	-0.447594	small	-0.602475	medium	-0.516818	medium	-0.00766204	small	-0.553717	medium	0.096391	small	-0.184797	small	0.0159277	small	0.385277	small	-0.51355	medium	0.343421	small
975	1933.58	5	168.112	-0.158128	small	-0.130396	small	-0.132414	small	-0.280106	small	-0.0580539	small	-0.220264	small	-0.185909	small	0.0128372	small	0.0516771	small	0.0469989	small	-0.0978774	small	0.112325	small	-0.0427235	small	-0.0110613	small	0.180492	small	0.169433	small	0.251678	small	0.067848	small	0.103505	small	0.336137	small	-0.0770799	small	0.17807	small	-0.140523	small
976	1934.09	2	5291.88	0.336962	small	-0.377333	small	-0.281788	small	-0.228112	small	-0.528084	medium	-0.0888097	small	-0.364385	small	-0.302419	small	-0.836698	large	-0.694804	medium	-0.492297	small	-0.801758	large	-0.421322	small	-0.664073	medium	-0.613199	medium	-0.00212357	small	-0.495813	small	0.181108	small	-0.177581	small	-0.0749976	small	0.364794	small	-0.573851	medium	0.30841	small
977	1935.09	1	9622.17	0.458714	small	-0.216481	small	-0.137218	small	-0.130628	small	-0.397585	small	0.0715052	small	-0.232969	small	-0.228393	small	-0.838867	large	-0.705864	medium	-0.537055	medium	-0.83947	large	-0.403217	small	-0.697672	medium	-0.687241	medium	0.0163647	small	-0.395083	small	0.230679	small	-0.131738	small	-0.118031	small	0.328013	small	-0.560906	medium	0.268922	small
978	1936.08	4	1241.29	0.65445	medium	0.11562	small	0.148778	small	0.177495	small	-0.0322724	small	0.348457	small	0.136721	small	-0.071184	small	-0.743189	medium	-0.660926	medium	-0.523598	medium	-0.793949	medium	-0.348021	small	-0.632255	medium	-0.829608	large	-0.0564043	small	-0.307742	small	0.206148	small	-0.0775386	small	-0.359115	small	0.211693	small	-0.469643	small	0.232354	small
979	1937.08	3	3957.2	0.467427	small	0.154712	small	0.149487	small	0.14111	small	0.128619	small	0.281984	small	0.117121	small	0.00939055	small	-0.454879	small	-0.451697	small	-0.392908	small	-0.416789	small	-0.234992	small	-0.451862	small	-0.59262	medium	-0.0216863	small	-0.0250162	small	0.176583	small	-0.0475743	small	-0.205809	small	0.00438013	small	-0.193847	small	-0.0186568	small
980	1938.72	3	3507.94	0.365368	small	0.445889	small	0.400183	small	0.432909	small	0.619884	medium	0.529203	medium	0.403453	small	0.296801	small	0.0765476	small	0.0221247	small	0.0353723	small	0.232568	small	0.14317	small	0.0204858	small	-0.0977892	small	-0.0152706	small	0.204584	small	0.113026	small	-0.0160481	small	-0.149177	small	-0.228278	small	0.0926173	small	-0.221329	small
981	1941.06	2	5097.33	0.251847	small	0.529126	medium	0.475519	small	0.540503	medium	0.712049	medium	0.523591	medium	0.516684	medium	0.407566	small	0.24346	small	0.184423	small	0.212213	small	0.383154	small	0.219534	small	0.206909	small	0.099586	small	-0.0536447	small	0.181784	small	0.00475787	small	-0.015529	small	-0.153454	small	-0.239687	small	0.173031	small	-0.198099	small
982	1943.06	5	496.945	0.591717	medium	0.595995	medium	0.585112	medium	1.09824	large	0.573733	medium	0.752374	medium	0.811782	large	0.305433	small	0.0330084	small	0.00722296	small	0.400531	small	-0.0307302	small	0.140784	small	0.185446	small	-0.312947	small	-0.416053	small	-0.447618	small	-0.259995	small	-0.223382	small	-0.793861	medium	0.0388319	small	-0.175531	small	0.221969	small
983	1944.06	5	535.089	0.58366	medium	0.558755	medium	0.546448	medium	1.03757	large	0.527848	medium	0.741093	medium	0.737615	medium	0.254456	small	-0.00150708	small	-0.0275121	small	0.368196	small	-0.0669582	small	0.1475	small	0.116346	small	-0.354392	small	-0.419645	small	-0.452487	small	-0.215535	small	-0.270337	small	-0.798985	medium	0.0408403	small	-0.218257	small	0.189857	small
984	1945.07	5	482.654	0.636352	medium	0.594361	medium	0.583243	medium	1.08891	large	0.617577	medium	0.81303	large	0.774372	medium	0.321107	small	0.00346757	small	-0.0247132	small	0.298136	small	-0.0244469	small	0.165932	small	0.0842538	small	-0.336432	small	-0.338374	small	-0.330251	small	-0.119839	small	-0.231503	small	-0.719638	medium	0.000418971	small	-0.192381	small	0.111266	small
985	1946.06	4	753.263	0.887519	large	0.6184	medium	0.728811	medium	1.54927	very large	0.92254	large	1.05148	large	1.05116	large	0.474013	small	0.187958	small	0.00287982	small	0.353431	small	0.52909	medium	0.275339	small	0.115406	small	-0.462719	small	-0.328297	small	0.32149	small	-0.0223827	small	-0.24172	small	-0.957626	large	-0.667915	medium	0.370313	small	-0.477643	small
986	1947.06	4	704.977	0.918082	large	0.65228	medium	0.782506	medium	1.61737	very large	0.950812	large	1.11734	large	1.14403	large	0.531531	medium	0.196735	small	0.0209407	small	0.345009	small	0.533813	medium	0.294997	small	0.150086	small	-0.462195	small	-0.307282	small	0.326137	small	0.000505322	small	-0.201285	small	-0.972409	large	-0.662609	medium	0.362839	small	-0.466541	small
987	1948.06	5	542.246	0.834165	large	0.752161	medium	0.799974	medium	1.4593	very large	1.03185	large	1.09765	large	1.12085	large	0.546804	medium	0.195526	small	0.0586339	small	0.318724	small	0.487983	small	0.282627	small	0.210695	small	-0.359456	small	-0.253968	small	0.261575	small	-0.00194844	small	-0.10712	small	-0.817872	large	-0.537203	medium	0.281495	small	-0.357346	small
988	1949.07	5	400.316	0.719184	medium	0.786174	medium	0.758481	medium	1.206	very large	1.04133	large	0.999582	large	1.01406	large	0.50741	medium	0.17235	small	0.0782601	small	0.26986	small	0.385381	small	0.243426	small	0.23947	small	-0.263675	small	-0.192127	small	0.159755	small	-0.0103207	small	-0.0207362	small	-0.630314	medium	-0.352529	small	0.170526	small	-0.181825	small
989	1950.09	5	487.708	0.996273	large	0.725416	medium	0.734622	medium	1.26268	very large	0.831975	large	0.999978	large	1.05903	large	0.579606	medium	-0.248477	small	-0.218266	small	-0.119625	small	-0.330811	small	0.0356006	small	-0.166538	small	-0.54493	medium	-0.0975152	small	-0.251665	small	0.150707	small	-0.0468575	small	-0.548465	medium	0.113512	small	-0.358894	small	0.20102	small
990	1951.09	4	723.895	1.1632	large	0.691613	medium	0.746873	medium	1.2936	very large	0.827758	large	1.14226	large	1.04951	large	0.552231	medium	-0.300289	small	-0.352209	small	0.0731432	small	-0.335137	small	-0.0162265	small	-0.299366	small	-0.764647	medium	-0.4356	small	-0.389569	small	-0.0869764	small	-0.365207	small	-0.840757	large	0.0120718	small	-0.316109	small	0.0616889	small
991	1952.08	4	760.042	1.14268	large	0.693251	medium	0.758753	medium	1.32318	very large	0.841929	large	1.19252	large	1.05419	large	0.513672	medium	-0.217403	small	-0.303167	small	0.200996	small	-0.216191	small	0.0303139	small	-0.221294	small	-0.760018	medium	-0.536514	medium	-0.387872	small	-0.173563	small	-0.412101	small	-0.920442	large	-0.0570837	small	-0.24604	small	0.0167774	small
992	1953.1	4	732.666	0.852238	large	0.57576	medium	0.593646	medium	1.1654	large	0.612353	medium	0.940426	large	0.842793	large	0.27069	small	-0.139146	small	-0.159007	small	0.161898	small	-0.202984	small	0.0668108	small	-0.00655394	small	-0.578156	medium	-0.3334	small	-0.364356	small	-0.0966947	small	-0.167305	small	-0.799754	medium	0.0489452	small	-0.270553	small	0.195624	small
993	1954.1	2	4326.41	-0.225172	small	-0.459943	small	-0.363616	small	-0.31188	small	-0.541682	medium	-0.351582	small	-0.254843	small	-0.338914	small	-0.228335	small	-0.141961	small	-0.19211	small	-0.541859	medium	-0.207004	small	-0.052009	small	-0.179777	small	0.0301153	small	-0.386048	small	-0.00896281	small	0.127271	small	-0.0197262	small	0.304757	small	-0.353789	small	0.452653	small
994	1955.1	3	1843.32	-0.270567	small	-0.541138	medium	-0.416692	small	-0.354342	small	-0.605192	medium	-0.418374	small	-0.289479	small	-0.339593	small	-0.269544	small	-0.147819	small	-0.261205	small	-0.759433	medium	-0.309945	small	-0.0455801	small	-0.136999	small	0.0726894	small	-0.578502	medium	-0.0449778	small	0.187894	small	0.0631837	small	0.422419	small	-0.462332	small	0.629501	medium
995	1956.1	4	1339.46	-0.123392	small	-0.321064	small	-0.228438	small	-0.16179	small	-0.450874	small	-0.240142	small	-0.104179	small	-0.235173	small	-0.223031	small	-0.120933	small	-0.103965	small	-0.658672	medium	-0.214253	small	0.0286255	small	-0.189781	small	-0.0264548	small	-0.596735	medium	-0.110858	small	0.122511	small	-0.0936462	small	0.408096	small	-0.409182	small	0.637118	medium
996	1957.09	2	8370.22	-0.193293	small	-0.328202	small	-0.246391	small	-0.214676	small	-0.448428	small	-0.270237	small	-0.11197	small	-0.268687	small	-0.10454	small	-0.0310381	small	-0.048023	small	-0.355488	small	-0.101402	small	0.113661	small	-0.101463	small	0.0163362	small	-0.368855	small	-0.058656	small	0.172141	small	-0.0592277	small	0.30114	small	-0.268831	small	0.506467	medium
997	1959.08	4	1166.28	0.462288	small	0.463948	small	0.441904	small	0.945121	large	0.49876	small	0.582511	medium	0.683144	medium	0.155571	small	0.047797	small	0.0019812	small	0.37444	small	0.0595017	small	0.115015	small	0.190392	small	-0.315361	small	-0.386541	small	-0.287886	small	-0.247958	small	-0.18673	small	-0.770379	medium	-0.0605603	small	-0.0505545	small	0.119771	small
998	1960.07	5	489.484	0.726421	medium	0.663321	medium	0.639479	medium	1.37417	very large	0.801669	large	0.893312	large	0.943936	large	0.337007	small	0.0566609	small	-0.00858176	small	0.419691	small	0.109456	small	0.165115	small	0.18302	small	-0.411342	small	-0.439452	small	-0.282954	small	-0.235735	small	-0.233788	small	-0.944124	large	-0.121792	small	-0.0511476	small	0.0645559	small
999	1961.06	5	510.559	0.802784	large	0.77899	medium	0.776782	medium	1.62445	very large	0.883469	large	1.04196	large	1.18375	large	0.487355	small	0.133724	small	0.095771	small	0.521412	medium	0.118193	small	0.234158	small	0.363864	small	-0.348045	small	-0.408333	small	-0.368581	small	-0.258176	small	-0.126763	small	-0.982567	large	-0.0234064	small	-0.10964	small	0.234855	small
1000	1962.06	5	562.02	0.734866	medium	0.74262	medium	0.74609	medium	1.4397	very large	0.791212	medium	0.999219	large	1.16169	large	0.405674	small	0.124685	small	0.107799	small	0.454051	small	0.0635874	small	0.239957	small	0.40052	small	-0.34807	small	-0.327912	small	-0.379174	small	-0.195222	small	-0.0249074	small	-0.905602	large	0.0452079	small	-0.174456	small	0.334759	small
[truncated: 536 more rows]
[truncated: 8 more columns]

## Sheet: Table S6
Table S6. Hypothetical identity of peptide components detected by MSI based on peptides identified in well-differentiated thyroid cancers
lp	MSI Molecular Component (m/z)	m/z Tolerance - Minimum	m/z Tolerance - Maximum	Measured Peptide m/z	Δ delta m/z	Aamimo Acid Sequence	Entry	Entry Name	Protein Name	Gene Name
[truncated: 4,022 more rows]

## Sheet: Table S7
Table S7. Hypothetical identity of peptide components detected by MSI based on peptides identified in medullary thyroid cancers
[truncated: 4,738 more rows]

[truncated: 2 more sheets: Table S8, Table S9]
